# Supplementary material for: Silver-catalyzed vinylcarbene insertion into Si–H bonds with vinyl N-triftosylhydrazones leading to allylsilanes
Source: Royal Society of Chemistry journal article supplement (doi:10.1039/d3qo00617d), 2023-01-01
Supplement: d3qo00617d1.pdf [file d3qo00617d1.pdf]

# Silver-Catalyzed Vinylcarbene Insertion into Si-H Bonds with Vinyl- *N*-Triftosylhydrazones Leading to Allylsilanes

Yong Wu,<sup>a</sup> Qingmin Song,<sup>a</sup> Ying Xia,<sup>a</sup> Yongquan Ning,<sup>a\*</sup> Sivaguru Paramasivam<sup>a</sup> and Xihe Bi<sup>a,b\*</sup>

<sup>a</sup> Jilin Province Key Laboratory of Organic Functional Molecular Design & Synthesis, Department of Chemistry, Northeast Normal University, Changchun 130024, China.

<sup>b</sup> State Key Laboratory of Elemento-Organic Chemistry, Nankai University, Tianjin 300071, China.

Email: [ningyq508@nenu.edu.cn](mailto:ningyq508@nenu.edu.cn) & [bixh507@nenu.edu.cn](mailto:bixh507@nenu.edu.cn)

## Contents

|                                                                                                          |           |
|----------------------------------------------------------------------------------------------------------|-----------|
| <b>I. General information</b> -----                                                                      | <b>2</b>  |
| <b>II. General procedures for synthesis of Vinyl-<i>N</i>-sulfonylhydrazones</b> -----                   | <b>2</b>  |
| <b>III. General procedures for synthesis of trifluoromethyl vinyl-<i>N</i>- sulfonylhydrazones</b> ----- | <b>2</b>  |
| <b>IV. General procedures for synthesis of allylsilanes</b> -----                                        | <b>4</b>  |
| <b>V. Characterization data of prepared compounds</b> -----                                              | <b>4</b>  |
| <b>VI. Copies of NMR spectra</b> -----                                                                   | <b>17</b> |
| <b>VII. Computational studies</b> -----                                                                  | <b>64</b> |

## I. General information.

All reagents were purchased from commercial sources and used without purification unless otherwise mentioned. The products were purified by column chromatography over silica gel (300-400). NMR spectra were recorded on a Bruker Advance 600 ( $^1\text{H}$ : 600 MHz,  $^{13}\text{C}$ : 150 MHz) and Bruker Advance 500 ( $^1\text{H}$ : 500 MHz,  $^{13}\text{C}$ : 125 MHz,  $^{19}\text{F}$ : 471 MHz) at ambient temperature. Data were reported as chemical shifts in ppm relative to TMS (0.00 ppm) for  $^1\text{H}$  and  $\text{CDCl}_3$  (77.0 ppm) for  $^{13}\text{C}$ . The following abbreviations were used to explain the multiplicities: s = singlet, d = doublet, t = triplet, q = quartet, m = multiplet, br = broad. Mass spectra were recorded on BRUKER AutoflexIII Smartbeam MS-spectrometer. High-resolution mass spectra (HRMS) were recorded on Bruker microTof by using ESI method.

## II. General Procedures for Synthesis of Vinyl-N-sulfonylhydrazones.

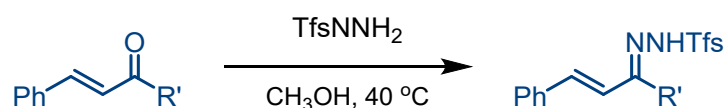

Vinyl-*N*-sulfonylhydrazones were prepared according to literature procedure. To a stirred solution of 2-(trifluoromethyl) benzenesulfonylhydrazide (2.0 mmol, 1.0 equiv) in methanol (2 mL) were added carbonyl compounds (2.0 mmol, 1.0 equiv) and the mixture was stirred for 1-2 h at room temperature. If the hydrazone precipitated, the mixture was filtered and the resulting solid was washed with ice cold diethyl ether and dried under reduced pressure to give pure vinyl-*N*-sulfonylhydrazones. If not, the solvent was removed and the residue was purified by flash chromatography on silica gel to obtain the *N*-Sulfonylhydrazone. The yields were around 70%-90% in general. (**Reference:** Yang et al., the merger of vinyl-*N*-trifosylhydrazones and silver catalysis to enable stereoselective vinylcyclopropanation of alkenes. *Chem. Catal.* **2022**, *2*, 563–577.)

## III. General procedures for the synthesis of trifluoromethyl vinyl-*N*- sulfonylhydrazones.

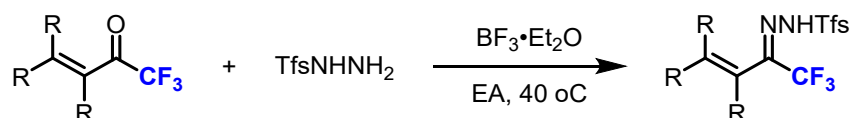

To a stirred solution of TfNNH<sub>2</sub> (2.2 mmol, 1.1 equiv) in ethyl acetate (2.0 mL) were added carbonyl compounds (2.2 mmol, 1.1 equiv) and boron trifluoride etherate. The mixture was stirred at 40 °C for 5 h. After the complete consumption of ketones, the solvent was removed

under reduced pressure, and the resultant residue was purified by flash chromatography on silica gel to obtain the trifluoromethyl vinyl-*N*- sulfonylhydrazones (**Reference:** Zhang *et al.*, A Carbene Strategy for Progressive (Deutero)Hydrodefluorination of Fluoroalkyl Ketones. *Angew. Chem. Int. Ed.* **2023**, *61*, e202116190)

**Part of select examples:**

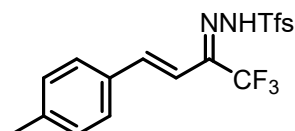

Yield 80 %.  $^1\text{H NMR}$  (500 MHz, DMSO)  $\delta$  12.76 (s, 1H), 8.18 (d,  $J = 7.5$  Hz, 1H), 8.06 (d,  $J = 7.5$  Hz, 1H), 7.99 (t,  $J = 7.5$  Hz, 1H), 7.94 (t,  $J = 7.5$  Hz, 1H), 7.68 (d,  $J = 8.0$  Hz, 2H), 7.44 (d,  $J = 16.5$  Hz, 1H), 7.30 (d,  $J = 8.0$  Hz, 2H), 7.15 (d,  $J = 16.5$  Hz, 1H), 2.37 (s, 3H).  $^{13}\text{C NMR}$  (150 MHz, DMSO)  $\delta$  140.96, 139.13, 138.22 (q,  $J = 33.0$  Hz), 137.61, 134.67, 134.01, 132.99, 132.28, 130.13, 129.16 (q,  $J = 5.5$  Hz), 128.70, 127.12 (q,  $J = 32.8$  Hz), 123.27 (q,  $J = 275.0$  Hz), 121.11 (q,  $J = 275.5$  Hz), 111.70, 60.34, 21.55, 14.60.  $^{19}\text{F NMR}$  (565 MHz, DMSO)  $\delta$  -56.46 (s, 3F), -64.18 (s, 3F). **HRMS** (ESI)  $m/z$  calculated  $\text{C}_{18}\text{H}_{14}\text{F}_6\text{N}_2\text{NaO}_2\text{S}$   $[\text{M}+\text{Na}]^+$  459.0572, found 459.0566.

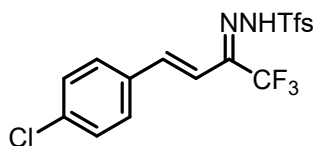

Yield 88 %. 189-190 °C.  $^1\text{H NMR}$  (500 MHz, DMSO)  $\delta$  12.72 (s, 1H), 8.13 (d,  $J = 7.5$  Hz, 1H), 8.01 (d,  $J = 7.5$  Hz, 1H), 7.96-7.88 (m, 2H), 7.76 (d,  $J = 8.5$  Hz, 2H), 7.50 (d,  $J = 8.5$  Hz, 2H), 7.42 (d,  $J = 16.5$  Hz, 1H), 7.12 (d,  $J = 16.5$  Hz, 1H).  $^{13}\text{C NMR}$  (125 MHz, DMSO)  $\delta$  141.5, 141.4 (q,  $J = 33.0$  Hz) 141.3, 138.8, 138.5, 137.8, 136.3, 136.2, 134.4, 133.0 (q,  $J = 6.5$  Hz), 131.0 (q,  $J = 33.0$  Hz), 128.1, 126.4 (q,  $J = 272.5$  Hz), 125.9, 117.3.  $^{19}\text{F NMR}$  (470 MHz, DMSO)  $\delta$  -56.47 (s, 3F), -64.25 (s, 3F). **HRMS** (ESI)  $m/z$  calculated  $\text{C}_{17}\text{H}_{11}\text{ClF}_6\text{N}_2\text{NaO}_2\text{S}$   $[\text{M}+\text{Na}]^+$  479.0026, found 479.0021.

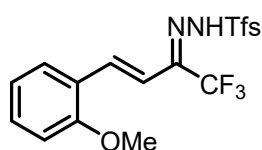

Yield 72 %.  $^1\text{H NMR}$  (600 MHz, DMSO)  $\delta$  12.72 (s, 1H), 8.12 (d,  $J = 8.0$  Hz, 1H), 8.05 (d,  $J = 8.0$

Hz, 1H), 7.96 (t,  $J = 7.5$  Hz, 1H), 7.92 (t,  $J = 7.5$  Hz, 1H), 7.88 (d,  $J = 8.0$  Hz, 1H), 7.50 (d,  $J = 16.5$  Hz, 1H), 7.44 (t,  $J = 8.0$  Hz, 1H), 7.37 (d,  $J = 16.5$  Hz, 1H), 7.09 (d,  $J = 8.0$  Hz, 1H), 7.06 (t,  $J = 7.5$  Hz, 1H), 3.85 (s, 3H).  $^{13}\text{C}$  NMR (150 MHz, DMSO)  $\delta$  157.85, 138.23 (q,  $J = 32.0$  Hz), 137.47, 134.55, 133.92, 132.80, 132.49, 132.07, 129.05 (q,  $J = 6.5$  Hz), 126.90 (q,  $J = 32.0$  Hz) 127.17, 123.74, 123.11 (q,  $J = 274.0$  Hz), 121.14, 121.01 (q,  $J = 276.0$  Hz), 112.25, 112.07, 56.26.  $^{19}\text{F}$  NMR (564 MHz, DMSO)  $\delta$  -56.38 (s, 3F), -64.08 (s, 3F). HRMS (ESI)  $m/z$  calculated  $\text{C}_{18}\text{H}_{14}\text{F}_6\text{N}_2\text{NaO}_3\text{S}$   $[\text{M}+\text{Na}]^+$  475.0521, found 475.0526.

#### IV. General procedures for synthesis of allylsilanes.

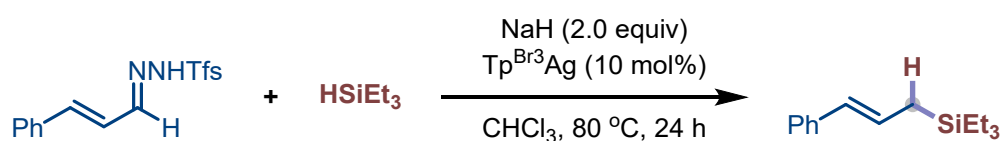

**General procedure (with 3 as an example):** In the glove box, a sealed tube was charged with alkenyl *N*-nosylhydrazones **1a** (0.3 mmol), NaH (14.0 mg, 60 wt.% dispersion in mineral oil, 1.2 equiv), **2a** (0.6 mmol, 2.0 equiv),  $\text{Tp}^{\text{Br}_3}\text{Ag}$  (5 mol%) and dry  $\text{CHCl}_3$  (5.0 mL). The resulting mixture was stirred at 80 °C for 24 h. When the reaction was completed, the reaction was allowed to cool to room temperature, and filtered through a short pad of silica gel with EtOAc as an eluent. After removal of the solvent under vacuum, the residue was purified by flash chromatography on silica gel (using PE and EA as eluent) to obtain the final product **3**.

#### V. Characterization data of prepared compounds.

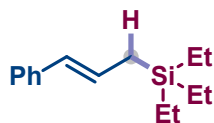

**3.** Colorless oil.  $^1\text{H}$  NMR (500 MHz,  $\text{CDCl}_3$ )  $\delta$  7.30-7.24 (m, 4H), 7.16-7.12 (m, 1H), 6.26-6.23 (m, 2H), 1.71-1.69 (m 2H), 0.96 (t,  $J = 8.0$  Hz, 9H), 0.57 (q,  $J = 8.0$  Hz, 6H).  $^{13}\text{C}$  NMR (125 MHz,  $\text{CDCl}_3$ )  $\delta$  138.6, 128.4, 128.1, 128.0, 126.1, 125.4, 18.8, 7.4, 3.2. HRMS (ESI)  $m/z$  calculated for  $\text{C}_{15}\text{H}_{25}\text{Si}$   $[\text{M}+\text{H}]^+$  233.1720, found 233.1721.

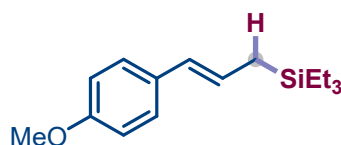

4. Colorless oil.  $^1\text{H NMR}$  (500 MHz,  $\text{CDCl}_3$ )  $\delta$  7.22 (d,  $J = 9.0$  Hz, 2H), 6.82 (d,  $J = 9.0$  Hz, 2H), 6.19 (d,  $J = 15.5$  Hz, 1H), 6.12-6.06 (m, 1H), 3.79 (s, 3H), 1.68-1.66 (m, 2H), 0.96 (t,  $J = 8.0$  Hz, 9H), 0.56 (q,  $J = 8.0$  Hz, 6H).  $^{13}\text{C NMR}$  (125MHz,  $\text{CDCl}_3$ )  $\delta$  158.2, 131.5, 127.4, 126.5, 125.8, 113.9, 55.3, 18.6, 7.4, 3.2. **HRMS** (ESI)  $m/z$  calculated for  $\text{C}_{16}\text{H}_{27}\text{OSi}$   $[\text{M}+\text{H}]^+$  263.1826, found 263.1823.

---

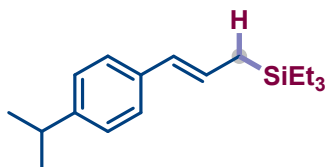

5. Colorless oil.  $^1\text{H NMR}$  (500 MHz,  $\text{CDCl}_3$ )  $\delta$  7.22 (d,  $J = 8.0$  Hz, 2H), 7.13 (d,  $J = 8.0$  Hz, 2H), 6.24-6.16 (m, 2H), 2.91-2.83 (m, 1H), 1.68 (d,  $J = 7.0$  Hz, 2H), 1.23 (d,  $J = 7.0$  Hz, 6H), 0.96 (t,  $J = 7.5$  Hz, 9H), 0.56 (q,  $J = 8.0$  Hz, 6H).  $^{13}\text{C NMR}$  (125MHz,  $\text{CDCl}_3$ )  $\delta$  146.8, 136.2, 127.9, 127.0, 126.5, 125.4, 33.8, 24.0, 18.7, 7.4, 3.2. **HRMS** (ESI)  $m/z$  calculated for  $\text{C}_{18}\text{H}_{30}\text{Si}$   $[\text{M}+\text{H}]^+$  275.2190, found 275.2181.

---

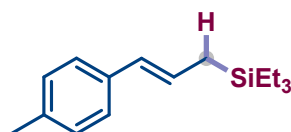

6. Colorless oil.  $^1\text{H NMR}$  (500 MHz,  $\text{CDCl}_3$ )  $\delta$  7.19 (d,  $J = 8.0$  Hz, 2H), 7.08 (d,  $J = 8.0$  Hz, 2H), 6.23-6.15 (m, 2H), 2.31 (s, 3H), 1.68 (d,  $J = 7.0$  Hz, 2H), 0.96 (t,  $J = 8.0$  Hz, 9H), 0.56 (q,  $J = 8.0$  Hz, 6H).  $^{13}\text{C NMR}$  (125MHz,  $\text{CDCl}_3$ )  $\delta$  135.8, 129.1, 127.8, 126.9, 125.3, 21.1, 18.7, 7.4, 3.2. **HRMS** (ESI)  $m/z$  calculated for  $\text{C}_{16}\text{H}_{26}\text{Si}$   $[\text{M}+\text{H}]^+$  245.1731, found 275.1715.

---

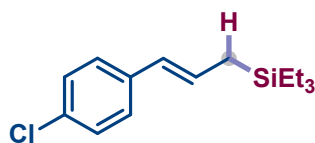

7. Colorless oil.  $^1\text{H NMR}$  (500 MHz,  $\text{CDCl}_3$ )  $\delta$  7.22-7.15 (m, 4H), 6.23-6.14 (m, 2H), 1.67 (d,  $J = 7.0$  Hz, 2H), 0.93 (t,  $J = 8.0$  Hz, 9H), 0.54 (q,  $J = 8.0$  Hz, 6H).  $^{13}\text{C NMR}$  (125MHz,  $\text{CDCl}_3$ )  $\delta$  137.0, 131.6, 128.9, 128.5, 126.8, 126.6, 18.9, 7.3, 3.2. **HRMS** (ESI)  $m/z$  calculated for  $\text{C}_{15}\text{H}_{22}\text{ClSi}$   $[\text{M}-\text{H}]^-$  265.1185, found 265.1183.

---

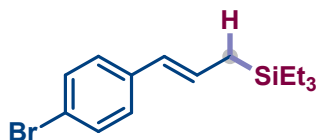

8. Colorless oil. <sup>1</sup>H NMR (500 MHz, CDCl<sub>3</sub>) δ 7.37 (d, *J* = 8.5 Hz, 2H), 7.14 (d, *J* = 8.5 Hz, 2H), 6.30-6.20 (m, 1H), 6.17 (d, *J* = 15.5 Hz, 1H), 1.69 (d, *J* = 7.5 Hz, 2H), 0.96 (t, *J* = 8.0 Hz, 9H), 0.56 (q, *J* = 8.0 Hz, 6H). <sup>13</sup>C NMR (125MHz, CDCl<sub>3</sub>) δ 137.4, 131.5, 129.1, 127.0, 126.8, 119.6, 19.0, 7.3, 3.2. HRMS (ESI) *m/z* calculated for C<sub>15</sub>H<sub>22</sub>BrSi [M-H]<sup>-</sup> 309.0680, found 309.0653.

---

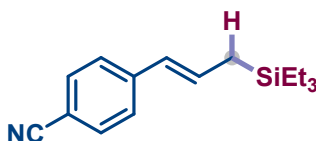

9. Colorless oil. <sup>1</sup>H NMR (500 MHz, CDCl<sub>3</sub>) δ 7.53 (d, *J* = 8.0 Hz, 2H), 7.34 (d, *J* = 8.0 Hz, 2H), 6.45-6.39 (m, 1H), 6.24 (d, *J* = 16.0 Hz, 1H), 1.76 (dd, *J* = 8.0, 1.0 Hz, 2H), 0.96 (t, *J* = 8.0 Hz, 9H), 0.57 (q, *J* = 8.0 Hz, 6H). <sup>13</sup>C NMR (150 MHz, CDCl<sub>3</sub>) δ 142.9, 133.1, 132.3, 126.6, 125.8, 119.3, 109.1, 19.7, 7.3, 3.2. HRMS (ESI) *m/z* calculated for C<sub>16</sub>H<sub>22</sub>NSi [M-H]<sup>-</sup> 256.1527, found 256.1503.

---

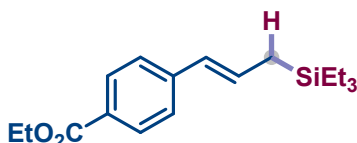

10. Colorless oil. <sup>1</sup>H NMR (500 MHz, CDCl<sub>3</sub>) δ 7.95 (d, *J* = 8.5 Hz, 2H), 7.33 (d, *J* = 8.5 Hz, 2H), 6.44-6.38 (m, 1H), 6.28 (d, *J* = 15.5 Hz, 1H), 4.36 (q, *J* = 7.0 Hz, 2H), 1.75 (dd, *J* = 8.5, 1.0 Hz, 2H), 1.39 (t, *J* = 7.0 Hz, 3H), 0.97 (t, *J* = 8.0 Hz, 9H), 0.58 (q, *J* = 7.5 Hz, 6H). <sup>13</sup>C NMR (125MHz, CDCl<sub>3</sub>) δ 166.6, 142.9, 131.4, 129.8, 127.9, 127.3, 125.1, 60.7, 19.4, 14.3, 7.3, 3.2. HRMS (ESI) *m/z* calculated for C<sub>18</sub>H<sub>29</sub>O<sub>2</sub>Si [M+H]<sup>+</sup> 305.1931, found 305.1909.

---

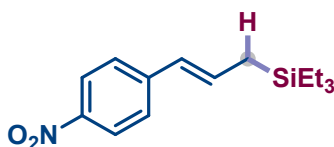

11. Colorless oil. <sup>1</sup>H NMR (600 MHz, CDCl<sub>3</sub>) δ 8.13 (d, *J* = 9.0 Hz, 2H), 7.38 (d, *J* = 9.0 Hz, 2H), 6.53-6.48 (m, 1H), 6.30 (d, *J* = 15.6 Hz, 1H), 1.80 (d, *J* = 9.0 Hz, 2H), 0.97 (t, *J* = 7.8 Hz, 9H), 0.59 (q, *J* = 7.8 Hz, 6H). <sup>13</sup>C NMR (150 MHz, CDCl<sub>3</sub>) δ 145.9, 145.0, 134.4, 126.2, 125.6, 124.0, 20.0, 7.3, 3.3. HRMS (ESI) *m/z* calculated for C<sub>15</sub>H<sub>24</sub>NO<sub>2</sub>Si [M+H]<sup>+</sup> 278.1576, found 278.1580.

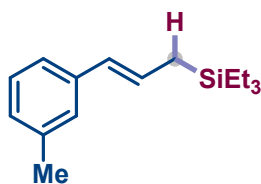

12. Colorless oil.  $^1\text{H NMR}$  (500 MHz,  $\text{CDCl}_3$ )  $\delta$  7.16 (t,  $J = 7.0$  Hz, 1H), 7.12-7.04 (m, 2H), 6.96 (d,  $J = 7.0$  Hz, 1H), 6.27-6.19 (m, 2H), 2.32 (s, 3H), 1.70-1.68 (m, 2H), 0.96 (t,  $J = 8.0$  Hz, 9H), 0.57 (q,  $J = 8.0$  Hz, 6H).  $^{13}\text{C NMR}$  (125 MHz,  $\text{CDCl}_3$ )  $\delta$  138.5, 137.9, 128.3, 128.1, 127.8, 126.9, 126.2, 122.6, 21.4, 18.8, 7.4, 3.2. **HRMS** (ESI)  $m/z$  calculated for  $\text{C}_{16}\text{H}_{25}\text{Si}$   $[\text{M}-\text{H}]^-$  245.1731, found 245.1715.

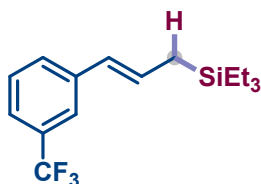

13. Colorless oil.  $^1\text{H NMR}$  (500 MHz,  $\text{CDCl}_3$ )  $\delta$  7.51 (s, 1H), 7.46 (d,  $J = 7.0$  Hz, 1H), 7.41-7.36 (m, 2H), 6.41-6.30 (m, 1H), 6.27 (d,  $J = 16.0$  Hz, 1H), 1.74 (d,  $J = 7.5$  Hz, 2H), 0.98 (t,  $J = 8.0$  Hz, 9H), 0.59 (q,  $J = 8.0$  Hz, 6H).  $^{13}\text{C NMR}$  (150 MHz,  $\text{CDCl}_3$ )  $\delta$  139.3, 130.8 (q,  $J = 30.0$  Hz), 130.4, 128.8, 128.4, 126.8, 124.3 (q,  $J = 270.0$  Hz), 122.7 (q,  $J = 4.5$  Hz), 122.1 (q,  $J = 4.5$  Hz), 19.1, 7.3, 3.2.  $^{19}\text{F NMR}$  (564 MHz,  $\text{CDCl}_3$ )  $\delta$  -62.8 (s). **HRMS** (ESI)  $m/z$  calculated for  $\text{C}_{16}\text{H}_{24}\text{F}_3\text{Si}$   $[\text{M}+\text{H}]^+$  301.1599, found 301.1593.

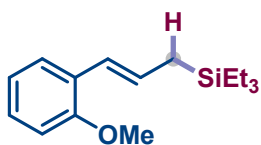

14. Colorless oil.  $^1\text{H NMR}$  (500 MHz,  $\text{CDCl}_3$ )  $\delta$  7.35 (d,  $J = 7.5$  Hz, 1H), 7.16-7.13 (m, 1H), 6.89 (t,  $J = 7.5$  Hz, 1H), 6.84 (d,  $J = 8.5$  Hz, 1H), 6.55 (d,  $J = 16.0$  Hz, 1H), 6.26-6.19 (m, 1H), 3.83 (s, 3H), 1.73 (d,  $J = 8.5$  Hz, 2H), 0.97 (t,  $J = 8.0$  Hz, 9H), 0.57 (q,  $J = 8.0$  Hz, 6H).  $^{13}\text{C NMR}$  (125 MHz,  $\text{CDCl}_3$ )  $\delta$  156.0, 128.8, 127.8, 127.1, 126.0, 122.6, 120.6, 110.8, 55.5, 19.3, 7.4, 3.3. **HRMS** (ESI)  $m/z$  calculated for  $\text{C}_{16}\text{H}_{25}\text{OSi}$   $[\text{M}-\text{H}]^-$  261.1680, found 261.1655.

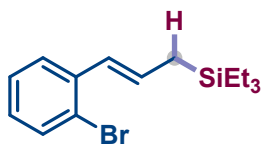

15. Colorless oil.  $^1\text{H NMR}$  (500 MHz,  $\text{CDCl}_3$ )  $\delta$  7.51 (dd,  $J = 8.0, 1.0$  Hz, 1H), 7.43 (dd,  $J = 7.5, 1.5$  Hz, 1H), 7.23 (t,  $J = 7.5$  Hz, 1H), 7.04-7.00 (m, 1H), 6.58 (d,  $J = 16.0$  Hz, 1H), 6.23-6.16 (m, 1H), 1.78 (dd,  $J = 8.5, 1.0$  Hz, 2H), 0.99 (t,  $J = 8.0$  Hz, 9H), 0.60 (q,  $J = 8.0$  Hz, 6H).  $^{13}\text{C NMR}$  (125 MHz,  $\text{CDCl}_3$ )  $\delta$  138.3, 132.7, 131.4, 127.5, 127.3, 127.0, 126.5, 122.7, 19.2, 7.4, 3.2. **HRMS** (ESI)  $m/z$  calculated for  $\text{C}_{15}\text{H}_{22}\text{BrSi}$  [M-H] $^-$  309.0680, found 309.0652.

---

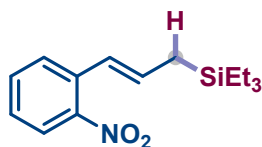

16. Colorless oil.  $^1\text{H NMR}$  (600 MHz,  $\text{CDCl}_3$ )  $\delta$  7.85 (d,  $J = 8.4$  Hz, 1H), 7.54-7.48 (m, 2H), 7.30-7.26 (m, 1H), 6.70 (d,  $J = 15.0$  Hz, 1H), 6.32-6.27 (m, 1H), 1.80 (d,  $J = 8.4$  Hz, 2H), 0.98 (t,  $J = 7.8$  Hz, 9H), 0.60 (q,  $J = 7.8$  Hz, 6H).  $^{13}\text{C NMR}$  (150 MHz,  $\text{CDCl}_3$ )  $\delta$  147.3, 134.5, 133.8, 132.7, 127.9, 126.6, 124.4, 122.8, 19.8, 7.3, 3.2. **HRMS** (ESI)  $m/z$  calculated for  $\text{C}_{15}\text{H}_{24}\text{NO}_2\text{Si}$  [M-H] $^-$  278.1576, found 278.1581.

---

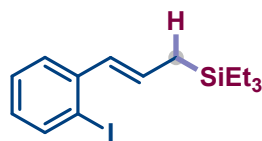

17. Colorless oil.  $^1\text{H NMR}$  (500 MHz,  $\text{CDCl}_3$ )  $\delta$  7.79 (dd,  $J = 8.0, 1.0$  Hz, 1H), 7.37 (dd,  $J = 8.0, 1.5$  Hz, 1H), 7.25 (t,  $J = 8.0$  Hz, 1H), 6.86-6.83 (m, 1H), 6.41 (d,  $J = 15.0$  Hz, 1H), 6.14-5.99 (m, 1H), 1.76 (dd,  $J = 8.5, 1.0$  Hz, 2H), 0.98 (t,  $J = 8.0$  Hz, 9H), 0.60 (q,  $J = 8.0$  Hz, 6H).  $^{13}\text{C NMR}$  (125 MHz,  $\text{CDCl}_3$ )  $\delta$  141.6, 139.3, 131.9, 131.6, 128.2, 127.7, 126.0, 99.1, 19.0, 7.4, 3.2. **HRMS** (ESI)  $m/z$  calculated for  $\text{C}_{15}\text{H}_{22}\text{ISi}$  [M-H] $^-$  357.0541, found 357.0510.

---

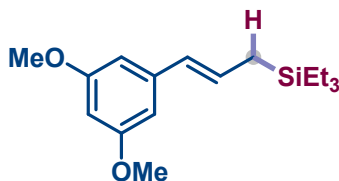

18. Colorless oil.  $^1\text{H NMR}$  (600 MHz,  $\text{CDCl}_3$ )  $\delta$  6.46 (d,  $J = 2.4$  Hz, 2H), 6.30 (t,  $J = 2.4$  Hz, 1H), 6.26-6.21 (m, 1H), 6.17 (d,  $J = 15.6$  Hz, 1H), 3.79 (s, 6H), 1.69 (d,  $J = 8.0$  Hz, 2H), 0.96 (t,  $J = 7.8$  Hz, 9H), 0.57 (q,  $J = 7.8$  Hz, 6H).  $^{13}\text{C NMR}$  (125 MHz,  $\text{CDCl}_3$ )  $\delta$  160.8, 140.6, 128.8, 127.9, 103.7, 98.3, 55.3, 18.8, 7.4, 3.2. **HRMS** (ESI)  $m/z$  calculated for  $\text{C}_{17}\text{H}_{29}\text{O}_2\text{Si}$  [M+H] $^+$  293.1931, found 293.1910.

---



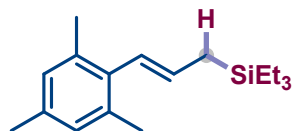

19. Colorless oil.  $^1\text{H NMR}$  (500 MHz,  $\text{CDCl}_3$ )  $\delta$  6.85 (s, 2H), 6.15 (d,  $J = 16.0$  Hz, 1H), 5.68-5.61 (m, 1H), 2.27 (s, 6H), 2.25 (s, 3H), 1.71 (dd,  $J = 8.0, 1.0$  Hz, 2H), 0.97 (t,  $J = 8.0$  Hz, 9H), 0.58 (q,  $J = 8.0$  Hz, 6H).  $^{13}\text{C NMR}$  (125 MHz,  $\text{CDCl}_3$ )  $\delta$  135.8, 135.3, 135.2, 131.9, 128.4, 125.6, 21.1, 20.8, 18.8, 7.4, 3.2. **HRMS** (ESI)  $m/z$  calculated for  $\text{C}_{18}\text{H}_{29}\text{Si}$  [M-H] $^-$  273.2044, found 273.2023.

---

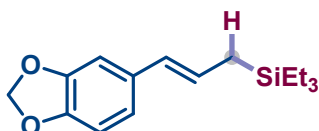

20. Colorless oil.  $^1\text{H NMR}$  (500 MHz,  $\text{CDCl}_3$ )  $\delta$  6.85 (s, 1H), 6.78-6.66 (m, 2H), 6.16 (d,  $J = 16.0$  Hz, 1H), 6.09-6.03 (m, 1H), 5.92 (s, 2H), 1.66 (d,  $J = 8.0$  Hz, 2H), 0.96 (t,  $J = 8.0$  Hz, 9H), 0.56 (q,  $J = 8.0$  Hz, 6H).  $^{13}\text{C NMR}$  (150 MHz,  $\text{CDCl}_3$ )  $\delta$  147.9, 146.0, 133.2, 127.6, 126.3, 119.5, 108.2, 105.0, 100.8, 18.6, 7.4, 3.2. **HRMS** (ESI)  $m/z$  calculated for  $\text{C}_{16}\text{H}_{25}\text{O}_2\text{Si}$  [M+H] $^+$  277.1618, found 277.1601.

---

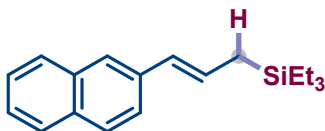

21. Colorless oil.  $^1\text{H NMR}$  (500 MHz,  $\text{CDCl}_3$ )  $\delta$  7.81-7.70 (m, 3H), 7.60 (s, 1H), 7.54 (d,  $J = 8.5$  Hz, 1H), 7.43-7.36 (m, 2H), 6.43-6.38 (m, 2H), 1.76 (d,  $J = 7.0$  Hz, 2H), 0.98 (t,  $J = 8.0$  Hz, 9H), 0.59 (q,  $J = 8.0$  Hz, 6H).  $^{13}\text{C NMR}$  (125 MHz,  $\text{CDCl}_3$ )  $\delta$  136.0, 133.8, 132.3, 128.6, 128.2, 128.0, 127.7, 127.6, 126.0, 125.1, 124.4, 123.4, 19.1, 7.4, 3.3. **HRMS** (ESI)  $m/z$  calculated for  $\text{C}_{19}\text{H}_{25}\text{Si}$  [M-H] $^-$  281.1731, found 281.1706.

---

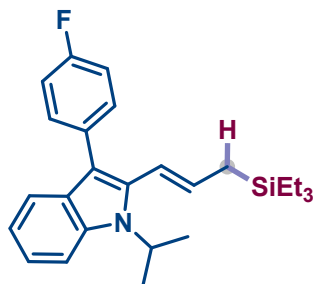

22. Colorless oil.  $^1\text{H NMR}$  (500 MHz,  $\text{CDCl}_3$ )  $\delta$  7.55-7.46 (m, 2H), 7.44-7.36 (m, 2H), 7.16-7.13 (m, 1H), 7.10-7.03 (m, 3H), 6.22 (d,  $J = 16.0$  Hz, 1H), 5.80-5.73 (m, 1H), 4.89-4.83 (m, 1H), 1.68-1.62 (m,

8H), 0.90 (t,  $J = 8.0$  Hz, 9H), 0.46 (q,  $J = 8.0$  Hz, 6H).  $^{13}\text{C}$  NMR (125 MHz,  $\text{CDCl}_3$ )  $\delta$  161.3 (d,  $J = 242.5$  Hz), 136.3, 135.4, 134.5, 132.1 (d,  $J = 3.3$  Hz), 132.0 (d,  $J = 8.8$  Hz), 128.6, 121.1, 119.3, 119.1, 117.3, 115.1 (d,  $J = 20.3$  Hz), 113.2, 111.6, 47.5, 21.6, 19.6, 7.3, 3.2.  $^{19}\text{F}$  NMR (470 MHz,  $\text{CDCl}_3$ )  $\delta$  -117.4--117.5 (m). HRMS (ESI)  $m/z$  calculated for  $\text{C}_{26}\text{H}_{35}\text{FNSi}$   $[\text{M}+\text{H}]^-$  408.2523, found 408.2529.

---

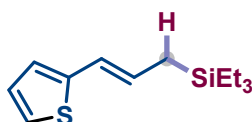

23. Colorless oil.  $^1\text{H}$  NMR (500 MHz,  $\text{CDCl}_3$ )  $\delta$  7.24-7.22 (m, 1H), 7.16-7.15 (m, 1H), 6.96 (d,  $J = 2.0$  Hz, 1H), 6.27 (d,  $J = 15.5$  Hz, 1H), 6.13-6.07 (m, 1H), 1.66 (dd,  $J = 7.5, 1.0$  Hz, 2H), 0.97 (t,  $J = 8.0$  Hz, 9H), 0.57 (q,  $J = 8.0$  Hz, 6H).  $^{13}\text{C}$  NMR (125 MHz,  $\text{CDCl}_3$ )  $\delta$  141.0, 128.0, 125.5, 124.8, 122.5, 118.9, 18.5, 7.4, 3.2. HRMS (ESI)  $m/z$  calculated for  $\text{C}_{13}\text{H}_{23}\text{SSi}$   $[\text{M}+\text{H}]^-$  239.1284, found 239.1270.

---

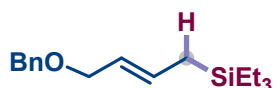

24. Colorless oil.  $^1\text{H}$  NMR (500 MHz,  $\text{CDCl}_3$ )  $\delta$  7.28-7.23 (m, 4H), 7.21-7.17 (m, 1H), 5.66-5.60 (m, 1H), 5.42- 5.36 (m, 1H), 4.40 (s, 2H), 3.88 (d,  $J = 6.0$  Hz, 2H), 1.47 (d,  $J = 8.0$  Hz, 2H), 0.86 (t,  $J = 8.0$  Hz, 9H), 0.46 (q,  $J = 8.0$  Hz, 6H).  $^{13}\text{C}$  NMR (125 MHz,  $\text{CDCl}_3$ )  $\delta$  138.6, 132.0, 128.3, 127.7, 127.4, 124.5, 71.3, 71.2, 17.6, 7.3, 3.1. HRMS (ESI)  $m/z$  calculated for  $\text{C}_{17}\text{H}_{27}\text{OSi}$   $[\text{M}-\text{H}]^-$  277.1982, found 277.1963.

---

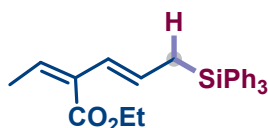

25. Colorless oil.  $^1\text{H}$  NMR (500 MHz,  $\text{CDCl}_3$ )  $\delta$  7.50-7.48 (m, 6H), 7.42-7.39 (m, 3H), 7.37-7.32 (m, 6H), 6.20-6.14 (m, 1H), 5.98 (d,  $J = 15.5$  Hz, 1H), 5.54 (s, 1H), 4.12 (q,  $J = 7.2$  Hz, 2H), 2.50 (d,  $J = 8.0$  Hz, 2H), 2.15 (s, 3H), 1.25 (t,  $J = 7.2$  Hz, 3H).  $^{13}\text{C}$  NMR (125 MHz,  $\text{CDCl}_3$ )  $\delta$  167.3, 152.6, 135.6, 133.9, 133.8, 133.2, 129.7, 127.9, 116.6, 59.5, 21.0, 14.3, 13.7. HRMS (ESI)  $m/z$  calculated for  $\text{C}_{27}\text{H}_{27}\text{O}_2\text{Si}$   $[\text{M}-\text{H}]^-$  411.1786, found 411.1748.

---

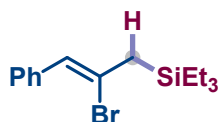

26. Colorless oil.  $^1\text{H NMR}$  (500 MHz,  $\text{CDCl}_3$ )  $\delta$  7.41 (d,  $J = 7.5$  Hz, 2H), 7.24 (t,  $J = 8.0$  Hz, 2H), 7.15 (t,  $J = 7.0$  Hz, 1H), 6.46 (s, 1H), 2.22 (s, 2H), 0.91 (t,  $J = 8.0$  Hz, 9H), 0.59 (q,  $J = 8.0$  Hz, 6H).  $^{13}\text{C NMR}$  (150 MHz,  $\text{CDCl}_3$ )  $\delta$  136.9, 128.7, 128.0, 127.0, 124.9, 30.1, 7.3, 3.5. **HRMS** (ESI)  $m/z$  calculated for  $\text{C}_{15}\text{H}_{24}\text{BrSi}$  [ $\text{M}+\text{H}$ ] $^-$  311.0825, found 311.0868.

---

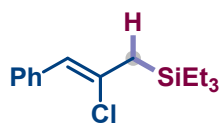

27. Colorless oil.  $^1\text{H NMR}$  (500 MHz,  $\text{CDCl}_3$ )  $\delta$  7.53 (d,  $J = 7.5$  Hz, 2H), 7.32 (t,  $J = 7.5$  Hz, 2H), 7.23-7.20 (m, 1H), 6.30 (s, 1H), 2.08 (s, 2H), 0.99 (t,  $J = 8.0$  Hz, 9H), 0.67 (q,  $J = 8.0$  Hz, 6H).  $^{13}\text{C NMR}$  (150 MHz,  $\text{CDCl}_3$ )  $\delta$  135.9, 133.4, 128.7, 128.1, 126.8, 121.9, 27.7, 7.3, 3.5. **HRMS** (ESI)  $m/z$  calculated for  $\text{C}_{15}\text{H}_{22}\text{ClSi}$  [ $\text{M}-\text{H}$ ] $^-$  265.1185, found 265.1183.

---

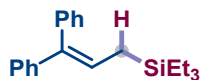

28. Colorless oil.  $^1\text{H NMR}$  (500 MHz,  $\text{CDCl}_3$ )  $\delta$  7.36 (t,  $J = 7.5$  Hz, 2H), 7.28 (t,  $J = 7.0$  Hz, 1H), 7.25-7.22 (m, 2H), 7.20-7.15 (m, 5H), 6.15 (t,  $J = 9.0$  Hz, 1H), 1.68 (d,  $J = 9.0$  Hz, 2H), 0.87 (t,  $J = 8.0$  Hz, 9H), 0.52 (q,  $J = 8.0$  Hz, 6H).  $^{13}\text{C NMR}$  (150 MHz,  $\text{CDCl}_3$ )  $\delta$  143.5, 140.5, 139.3, 130.3, 128.2, 128.0, 126.9, 126.7, 126.5, 126.3, 15.9, 7.3, 3.4. **HRMS** (ESI)  $m/z$  calculated for  $\text{C}_{21}\text{H}_{27}\text{Si}$  [ $\text{M}-\text{H}$ ] $^-$  309.2033, found 309.2013.

---

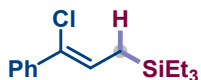

29. Colorless oil.  $^1\text{H NMR}$  (500 MHz,  $\text{CDCl}_3$ )  $\delta$  7.54-7.53 (m, 2H), 7.33 (t,  $J = 7.0$  Hz, 2H), 7.28-7.25 (m, 1H), 6.21 (t,  $J = 8.5$  Hz, 1H), 1.92 (d,  $J = 9.0$  Hz, 2H), 1.00 (t,  $J = 8.0$  Hz, 9H), 0.62 (q,  $J = 8.0$  Hz, 6H).  $^{13}\text{C NMR}$  (125 MHz,  $\text{CDCl}_3$ )  $\delta$  138.8, 129.7, 128.2, 127.6, 126.0, 125.3, 16.7, 7.4, 3.6. **HRMS** (ESI)  $m/z$  calculated for  $\text{C}_{15}\text{H}_{22}\text{ClSi}$  [ $\text{M}-\text{H}$ ] $^-$  265.1185, found 265.1183.

---

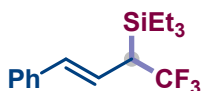

30. Colorless oil.  $^1\text{H NMR}$  (500 MHz,  $\text{CDCl}_3$ )  $\delta$  7.35-7.29 (m, 4H), 7.24-7.21 (m, 1H), 6.40 (d,  $J = 15.5$  Hz, 1H), 6.11 (dd,  $J = 15.5, 10.5$  Hz, 1H), 2.75-2.65 (m, 1H), 0.99 (t,  $J = 8.0$  Hz, 9H), 0.71 (q,  $J = 8.0$  Hz, 6H).  $^{13}\text{C NMR}$  (125 MHz,  $\text{CDCl}_3$ )  $\delta$  137.0, 132.5, 128.6, 128.3 (q,  $J = 275.0$  Hz), 127.5, 126.1, 121.5 (q,  $J = 4.2$  Hz), 38.5 (q,  $J = 28.0$  Hz), 7.1, 2.7.  $^{19}\text{F NMR}$  (470 MHz,  $\text{CDCl}_3$ )  $\delta$  -59.0 (d,  $J = 11.5$  Hz). **HRMS** (ESI)  $m/z$  calculated for  $\text{C}_{16}\text{H}_{24}\text{F}_3\text{Si}$  [ $\text{M}+\text{H}$ ] $^-$  301.4482, found 301.4488.

---

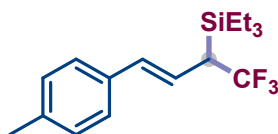

31. Colorless oil.  $^1\text{H NMR}$  (600 MHz,  $\text{CDCl}_3$ )  $\delta$  7.24 (d,  $J = 8.0$  Hz, 2H), 7.12 (d,  $J = 8.0$  Hz, 2H), 6.36 (d,  $J = 15.6$  Hz, 1H), 6.05 (dd,  $J = 15.6, 10.8$  Hz, 1H), 2.71-2.63 (m, 1H), 2.33 (s, 3H), 0.98 (t,  $J = 7.8$  Hz, 9H), 0.70 (q,  $J = 7.8$  Hz, 6H).  $^{13}\text{C NMR}$  (150 MHz,  $\text{CDCl}_3$ )  $\delta$  137.3, 134.2, 132.4, 129.3, 128.3 (q,  $J = 275.0$  Hz), 126.0, 120.4 (q,  $J = 4.5$  Hz), 38.4 (q,  $J = 28.5$  Hz), 21.1, 7.1, 2.7.  $^{19}\text{F NMR}$  (565 MHz,  $\text{CDCl}_3$ )  $\delta$  -59.0 (d,  $J = 13.0$  Hz). **HRMS** (ESI)  $m/z$  calculated for  $\text{C}_{17}\text{H}_{24}\text{F}_3\text{Si}$  [ $\text{M}-\text{H}$ ] $^-$  313.1605, found 313.1620.

---

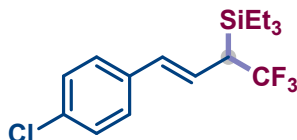

32. Colorless oil.  $^1\text{H NMR}$  (500 MHz,  $\text{CDCl}_3$ )  $\delta$  7.29-7.24 (m, 4H), 6.35 (d,  $J = 16.0$  Hz, 1H), 6.09 (dd,  $J = 16.0, 10.5$  Hz, 1H), 2.74-2.65 (m, 1H), 0.98 (t,  $J = 7.5$  Hz, 9H), 0.70 (q,  $J = 7.5$  Hz, 6H).  $^{13}\text{C NMR}$  (125 MHz,  $\text{CDCl}_3$ )  $\delta$  135.4, 133.1, 131.2, 128.8, 128.2 (q,  $J = 275.0$  Hz), 127.3, 122.4 (q,  $J = 4.5$  Hz), 38.6 (q,  $J = 28.4$  Hz), 7.1, 2.7.  $^{19}\text{F NMR}$  (470 MHz,  $\text{CDCl}_3$ )  $\delta$  -59.0 (d,  $J = 12.5$  Hz). **HRMS** (ESI)  $m/z$  calculated for  $\text{C}_{16}\text{H}_{23}\text{F}_3\text{ClSi}$  [ $\text{M}+\text{H}$ ] $^-$  335.1210, found 335.1217.

---

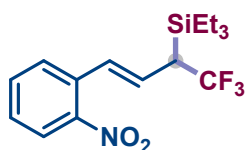

33. Colorless oil.  $^1\text{H NMR}$  (500 MHz,  $\text{CDCl}_3$ )  $\delta$  7.95 (d,  $J = 8.5$  Hz, 1H), 7.59-7.56 (m, 2H), 7.42-7.38 (m, 1H), 6.91 (d,  $J = 15.5$  Hz, 1H), 6.13 (dd,  $J = 15.5, 10.5$  Hz, 1H), 2.87-2.78 (m, 1H), 1.01 (t,  $J = 8.0$

Hz, 9H), 0.74 (q,  $J = 8.0$  Hz, 6H).  $^{13}\text{C}$  NMR (125 MHz,  $\text{CDCl}_3$ )  $\delta$  147.5, 133.2, 132.6, 128.5, 128.039 (q,  $J = 278.0$  Hz), 128.038, 127.7, 127.3 (q,  $J = 4.2$  Hz), 124.6, 38.9 (q,  $J = 28.0$  Hz), 7.1, 2.6.  $^{19}\text{F}$  NMR (470 MHz,  $\text{CDCl}_3$ )  $\delta$  -58.8 (d,  $J = 11.0$  Hz). HRMS (ESI)  $m/z$  calculated for  $\text{C}_{16}\text{H}_{21}\text{F}_3\text{NO}_2\text{Si}$  [M-H]<sup>-</sup> 344.1299, found 344.1267.

---

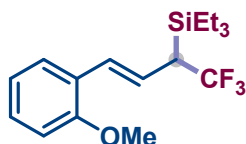

**34.** Colorless oil.  $^1\text{H}$  NMR (500 MHz,  $\text{CDCl}_3$ )  $\delta$  7.38 (dd,  $J = 7.5, 1.0$  Hz, 1H), 7.24-7.19 (m, 1H), 6.92 (t,  $J = 7.0$  Hz, 1H), 6.86 (d,  $J = 7.5$  Hz, 1H), 6.70 (d,  $J = 16.0$  Hz, 1H), 6.13 (dd,  $J = 16.0, 10.5$  Hz, 1H), 3.83 (s, 3H), 2.77-2.68 (m, 1H), 0.99 (t,  $J = 8.0$  Hz, 9H), 0.71 (q,  $J = 8.0$  Hz, 6H).  $^{13}\text{C}$  NMR (150 MHz,  $\text{CDCl}_3$ )  $\delta$  156.5, 128.44, 128.41 (q,  $J = 277.0$  Hz), 127.5, 126.5, 126.1, 121.9 (q,  $J = 4.0$  Hz), 120.6, 110.9, 55.4, 38.9 (q,  $J = 28.5$  Hz), 7.1, 2.7.  $^{19}\text{F}$  NMR (565 MHz,  $\text{CDCl}_3$ )  $\delta$  -59.0 (d,  $J = 12.4$  Hz). HRMS (ESI)  $m/z$  calculated for  $\text{C}_{17}\text{H}_{25}\text{F}_3\text{OSi}$  [M-H]<sup>-</sup> 329.1554, found 329.1525.

---

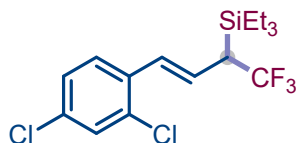

**35.** Colorless oil.  $^1\text{H}$  NMR (600 MHz,  $\text{CDCl}_3$ )  $\delta$  7.39 (d,  $J = 8.4$  Hz, 1H), 7.36 (d,  $J = 1.8$  Hz, 1H), 7.19 (dd,  $J = 8.4, 1.8$  Hz, 1H), 6.70 (d,  $J = 15.6$  Hz, 1H), 6.08 (dd,  $J = 15.6, 10.4$  Hz, 1H), 2.86-2.73 (m, 1H), 0.99 (t,  $J = 7.8$  Hz, 9H), 0.72 (q,  $J = 7.8$  Hz, 6H).  $^{13}\text{C}$  NMR (150 MHz,  $\text{CDCl}_3$ )  $\delta$  133.8, 133.5, 133.3, 129.4, 128.1 (q,  $J = 274.5$  Hz), 127.7, 127.4, 127.3, 125.2 (q,  $J = 4.5$  Hz), 38.9 (q,  $J = 28.5$  Hz), 7.1, 2.7.  $^{19}\text{F}$  NMR (565 MHz,  $\text{CDCl}_3$ )  $\delta$  -58.9 (d,  $J = 12.5$  Hz). HRMS (ESI)  $m/z$  calculated for  $\text{C}_{16}\text{H}_{22}\text{F}_3\text{Cl}_2\text{Si}$  [M+H]<sup>+</sup> 369.0820, found 369.0825.

---

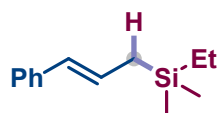

**36.** Colorless oil.  $^1\text{H}$  NMR (500 MHz,  $\text{CDCl}_3$ )  $\delta$  7.43-7.34 (m, 4H), 7.26 (t,  $J = 7.0$  Hz, 1H), 6.40-6.30 (m, 2H), 1.78 (d,  $J = 6.5$  Hz, 2H), 1.06 (t,  $J = 8.0$  Hz, 3H), 0.65 (q,  $J = 8.0$  Hz, 2H), 0.12 (s, 6H).  $^{13}\text{C}$  NMR (125 MHz,  $\text{CDCl}_3$ )  $\delta$  138.5, 128.4, 128.1, 127.9, 126.2, 125.5, 22.2, 7.3, 6.7, -4.1. HRMS (ESI)  $m/z$  calculated for  $\text{C}_{13}\text{H}_{21}\text{Si}$  [M+H]<sup>+</sup> 205.1413, found 205.1420.

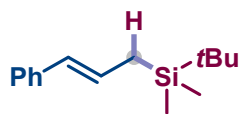

**37.** Colorless oil.  $^1\text{H NMR}$  (500 MHz,  $\text{CDCl}_3$ )  $\delta$  7.44-7.39 (m, 4H), 7.28 (t,  $J = 7.0$  Hz, 1H), 6.42-6.35 (m, 2H), 1.84-1.80 (m, 2H), 1.05 (s, 9H), 0.12 (s, 6H).  $^{13}\text{C NMR}$  (150 MHz,  $\text{CDCl}_3$ )  $\delta$  135.8, 128.4, 128.3, 128.2, 126.1, 125.5, 26.6, 20.0, 16.8, -6.4. **HRMS** (ESI)  $m/z$  calculated for  $\text{C}_{15}\text{H}_{23}\text{Si}$   $[\text{M}-\text{H}]^-$  234.1575, found 234.1551.

---

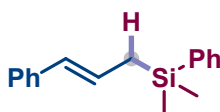

**38.** Colorless oil.  $^1\text{H NMR}$  (500 MHz,  $\text{CDCl}_3$ )  $\delta$  7.58-7.56 (m, 2H), 7.42-7.39 (m, 3H), 7.33-7.27 (m, 4H), 7.22-7.17 (m, 1H), 6.30-6.22 (m, 2H), 1.94 (d,  $J = 6.5$  Hz, 2H), 0.36 (s, 6H).  $^{13}\text{C NMR}$  (150 MHz,  $\text{CDCl}_3$ )  $\delta$  138.5, 138.4, 133.6, 129.1, 128.9, 128.4, 127.8, 127.1, 126.3, 125.5, 23.0, -3.3. **HRMS** (ESI)  $m/z$  calculated for  $\text{C}_{17}\text{H}_{21}\text{Si}$   $[\text{M}+\text{H}]^+$  253.1413, found 253.1419.

---

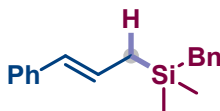

**39.** Colorless oil.  $^1\text{H NMR}$  (500 MHz,  $\text{CDCl}_3$ )  $\delta$  7.39-7.35 (m, 4H), 7.32 (t,  $J = 7.5$  Hz, 2H), 7.27-7.24 (m, 1H), 7.18 (t,  $J = 7.5$  Hz, 1H), 7.12 (d,  $J = 7.5$  Hz, 2H), 6.34-6.24 (m, 2H), 2.24 (s, 2H), 1.77 (d,  $J = 7.5$  Hz, 2H), 0.12 (s, 6H).  $^{13}\text{C NMR}$  (125 MHz,  $\text{CDCl}_3$ )  $\delta$  139.8, 138.3, 128.7, 128.4, 128.2, 128.1, 127.1, 126.3, 125.5, 124.1, 25.3, 22.0, -3.8. **HRMS** (ESI)  $m/z$  calculated for  $\text{C}_{18}\text{H}_{21}\text{Si}$   $[\text{M}-\text{H}]^-$  265.1418, found 265.1456.

---

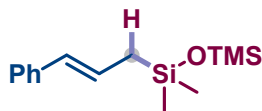

**40.** Colorless oil.  $^1\text{H NMR}$  (500 MHz,  $\text{CDCl}_3$ )  $\delta$  7.23-7.17 (m, 4H), 7.09-7.05 (m, 1H), 6.20- 6.15 (m, 2H), 1.63-1.61 (m, 2H), 0.03 (s, 6H), 0.00 (s, 9H).  $^{13}\text{C NMR}$  (125 MHz,  $\text{CDCl}_3$ )  $\delta$  138.5, 128.8, 128.4, 126.9, 126.2, 125.5, 25.6, 2.0, 0.1. **HRMS** (ESI)  $m/z$  calculated for  $\text{C}_{14}\text{H}_{25}\text{OSi}_2$   $[\text{M}+\text{H}]^+$  265.1444, found 265.1438.

---

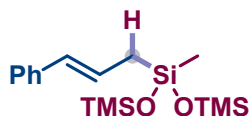

41. Colorless oil.  $^1\text{H NMR}$  (500 MHz,  $\text{CDCl}_3$ )  $\delta$  7.34-7.29 (m, 4H), 7.20-7.17 (m, 1H), 6.37-6.20 (m, 2H), 1.68 (d,  $J = 7.5$  Hz, 2H), 0.14 (s, 18H), 0.10 (s, 3H).  $^{13}\text{C NMR}$  (125 MHz,  $\text{CDCl}_3$ )  $\delta$  138.4, 129.2, 128.4, 126.5, 126.2, 125.5, 24.8, 1.9, -0.6. **HRMS** (ESI)  $m/z$  calculated for  $\text{C}_{16}\text{H}_{29}\text{O}_2\text{Si}_3$  [M-H]- 337.1481, found 337.1448.

---

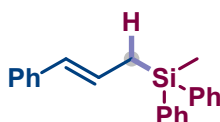

42. Colorless oil.  $^1\text{H NMR}$  (600 MHz,  $\text{CDCl}_3$ )  $\delta$  7.56-7.51 (m, 4H), 7.39-7.33 (m, 6H), 7.24-7.21 (m, 4H), 7.15-7.11 (m, 1H), 6.28-6.18 (m, 2H), 2.21 (d,  $J = 7.2$  Hz, 2H), 0.58 (s, 3H).  $^{13}\text{C NMR}$  (125 MHz,  $\text{CDCl}_3$ )  $\delta$  138.2, 136.4, 134.5, 129.6, 129.4, 128.4, 127.9, 126.5, 126.4, 125.6, 21.4, -4.6. **HRMS** (ESI)  $m/z$  calculated for  $\text{C}_{22}\text{H}_{21}\text{Si}$  [M-H]- 313.1418, found 313.1391.

---

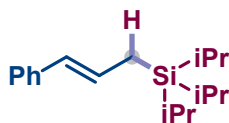

43. Colorless oil.  $^1\text{H NMR}$  (500 MHz,  $\text{CDCl}_3$ )  $\delta$  7.29-7.25 (m, 4H), 7.16-7.13 (m, 1H), 6.30-6.26 (m, 2H), 1.81-1.78 (m, 2H), 1.10-1.05 (m, 21H).  $^{13}\text{C NMR}$  (125 MHz,  $\text{CDCl}_3$ )  $\delta$  138.6, 128.7, 128.4, 128.1, 126.1, 125.4, 18.7, 16.7, 11.1. **HRMS** (ESI)  $m/z$  calculated for  $\text{C}_{18}\text{H}_{30}\text{Si}$  [M-H]- 330.0723, found 330.0724. **HRMS** (ESI)  $m/z$  calculated for  $\text{C}_{18}\text{H}_{29}\text{Si}$  [M-H]- 273.2044, found 273.2050.

---

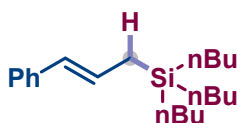

44. Colorless oil.  $^1\text{H NMR}$  (500 MHz,  $\text{CDCl}_3$ )  $\delta$  7.29-7.25 (m, 4H), 7.16-7.12 (m, 1H), 6.24-6.22 (m, 2H), 1.72-1.65 (m, 2H), 1.35-1.28 (m, 12H), 0.88 (t,  $J = 7.0$  Hz, 9H), 0.58-0.54 (m, 6H).  $^{13}\text{C NMR}$  (125 MHz,  $\text{CDCl}_3$ )  $\delta$  138.6, 128.4, 128.2, 128.1, 126.1, 125.4, 26.8, 26.1, 19.9, 13.8, 12.0. **HRMS** (ESI)  $m/z$  calculated for  $\text{C}_{21}\text{H}_{35}\text{Si}$  [M-H]- 315.2514, found 315.2485.

---

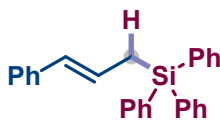

45. Colorless oil.  $^1\text{H NMR}$  (500 MHz,  $\text{CDCl}_3$ )  $\delta$  7.56-7.51 (m, 6H), 7.43-7.38 (m, 3H), 7.37-7.32 (m, 6H), 7.24-7.16 (m, 4H), 7.14-7.10 (m, 1H), 6.29-6.22 (m, 2H), 2.55-2.52 (m, 2H).  $^{13}\text{C NMR}$  (125 MHz,  $\text{CDCl}_3$ )  $\delta$  138.2, 135.7, 134.4, 130.3, 129.6, 128.4, 127.9, 126.4, 126.1, 125.6, 20.4. **HRMS** (ESI)  $m/z$  calculated for  $\text{C}_{27}\text{H}_{23}\text{Si}$  [M-H] $^-$  375.1575, found 375.1543.

---

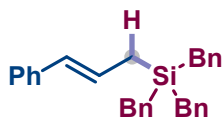

46. Colorless oil.  $^1\text{H NMR}$  (500 MHz,  $\text{CDCl}_3$ )  $\delta$  7.30-7.20 (m, 8H), 7.18-7.15 (m, 3H), 7.12 (t,  $J = 7.0$  Hz, 3H), 6.99 (d,  $J = 7.5$  Hz, 6H), 6.14 (d,  $J = 16.0$  Hz, 1H), 5.86-5.79 (m, 1H), 2.17 (s, 6H), 1.63 (d,  $J = 8.0$  Hz, 2H).  $^{13}\text{C NMR}$  (150 MHz,  $\text{CDCl}_3$ )  $\delta$  138.9, 138.0, 129.8, 128.6, 128.43, 128.40, 126.4, 126.2, 125.6, 124.5, 21.8, 19.1. **HRMS** (ESI)  $m/z$  calculated for  $\text{C}_{30}\text{H}_{29}\text{Si}$  [M-H] $^-$  417.2044, found 417.2010.



VI. Copies of NMR spectra.

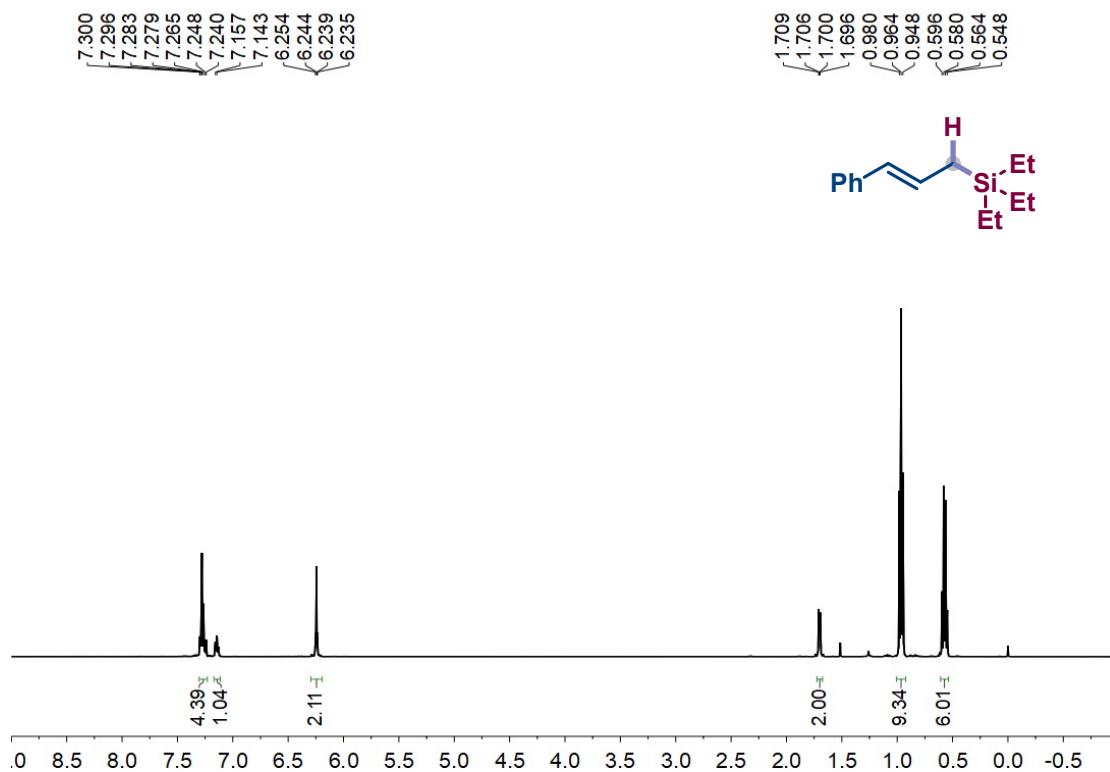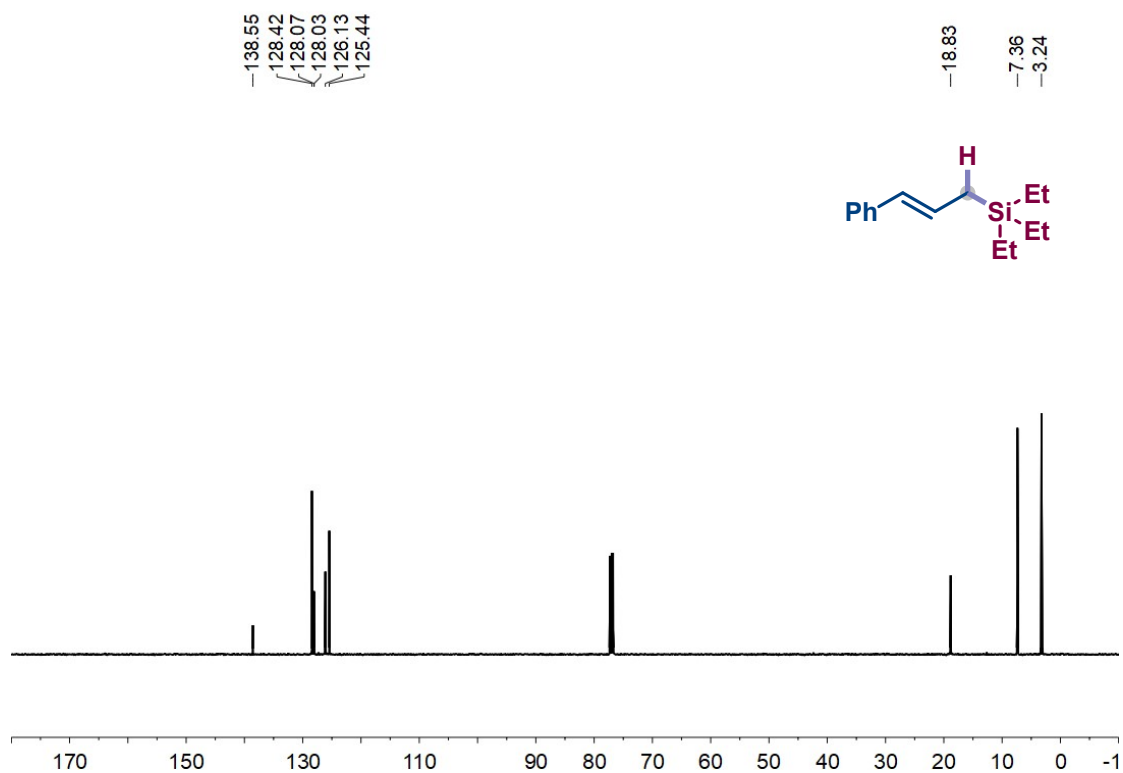

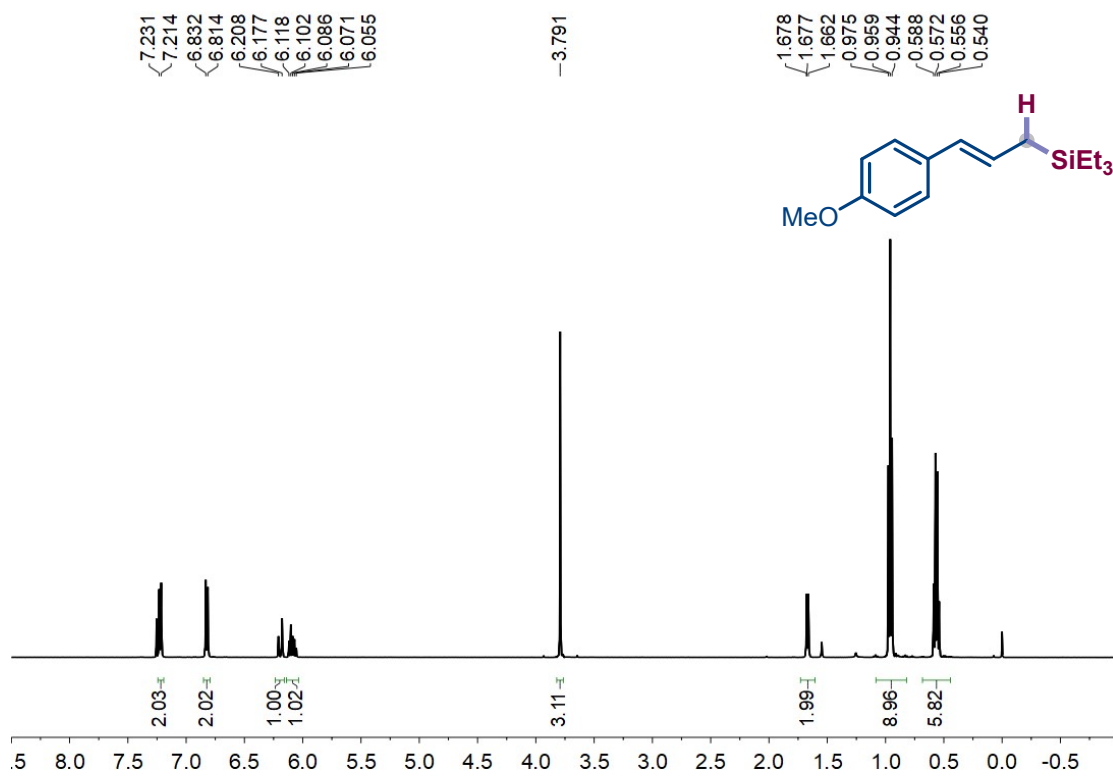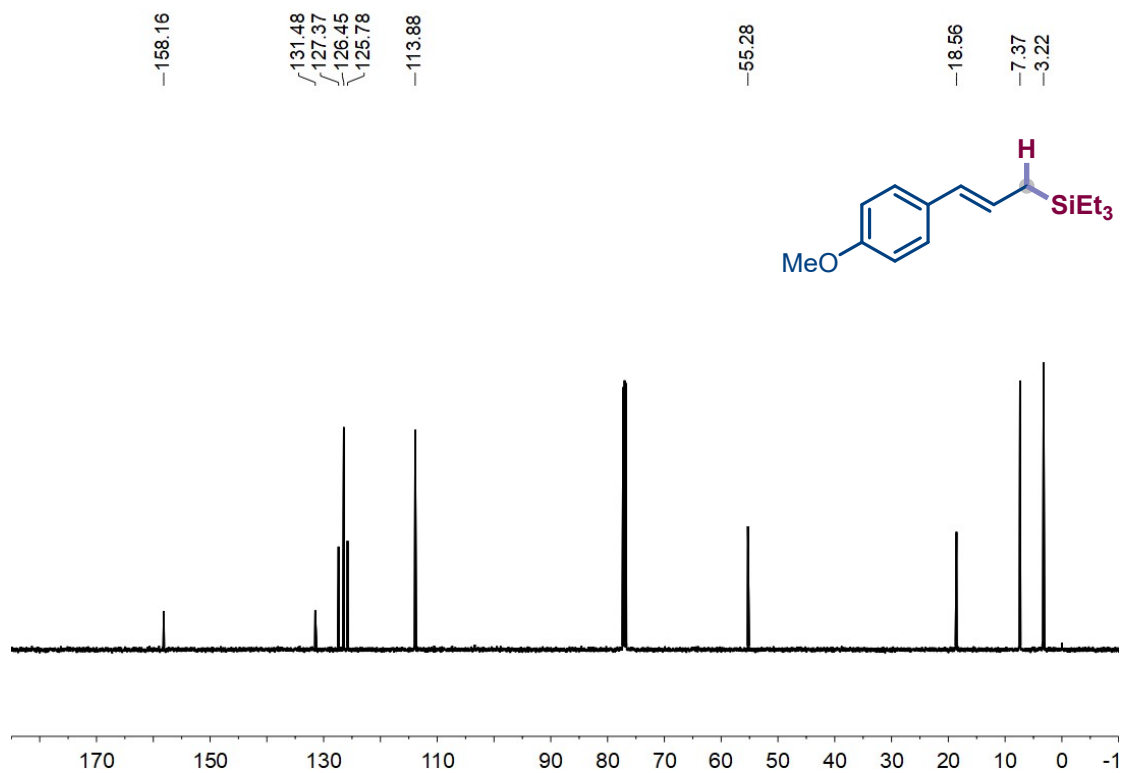

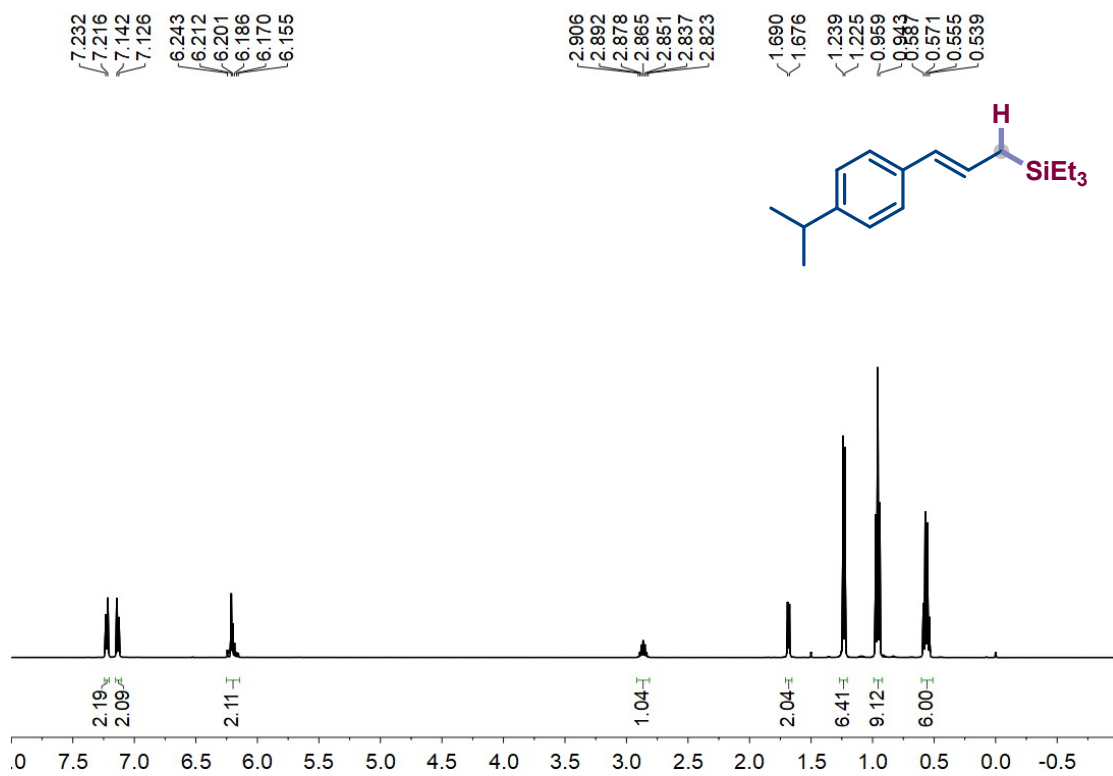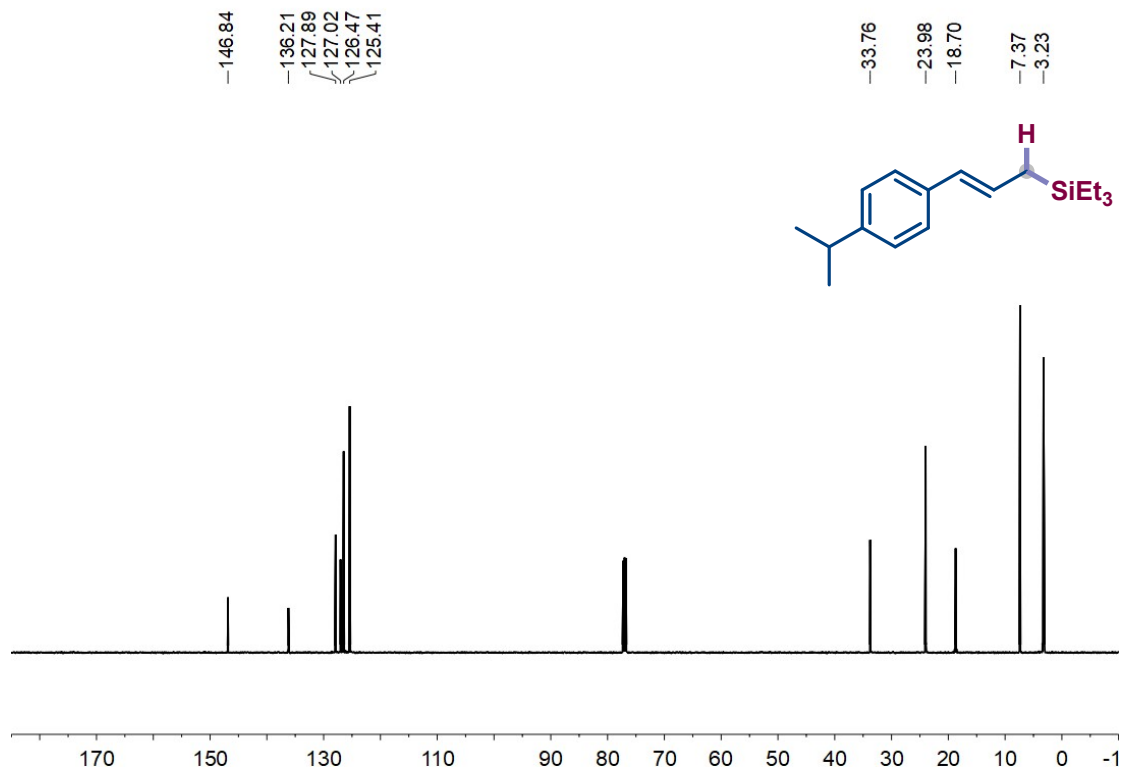

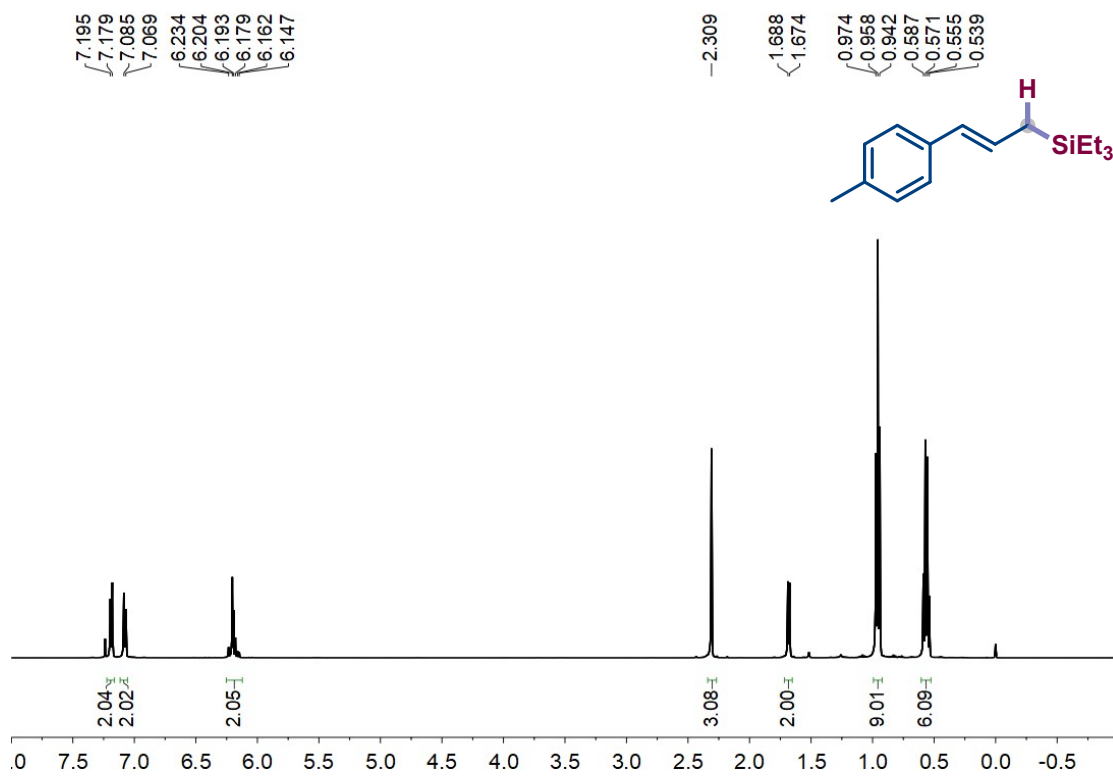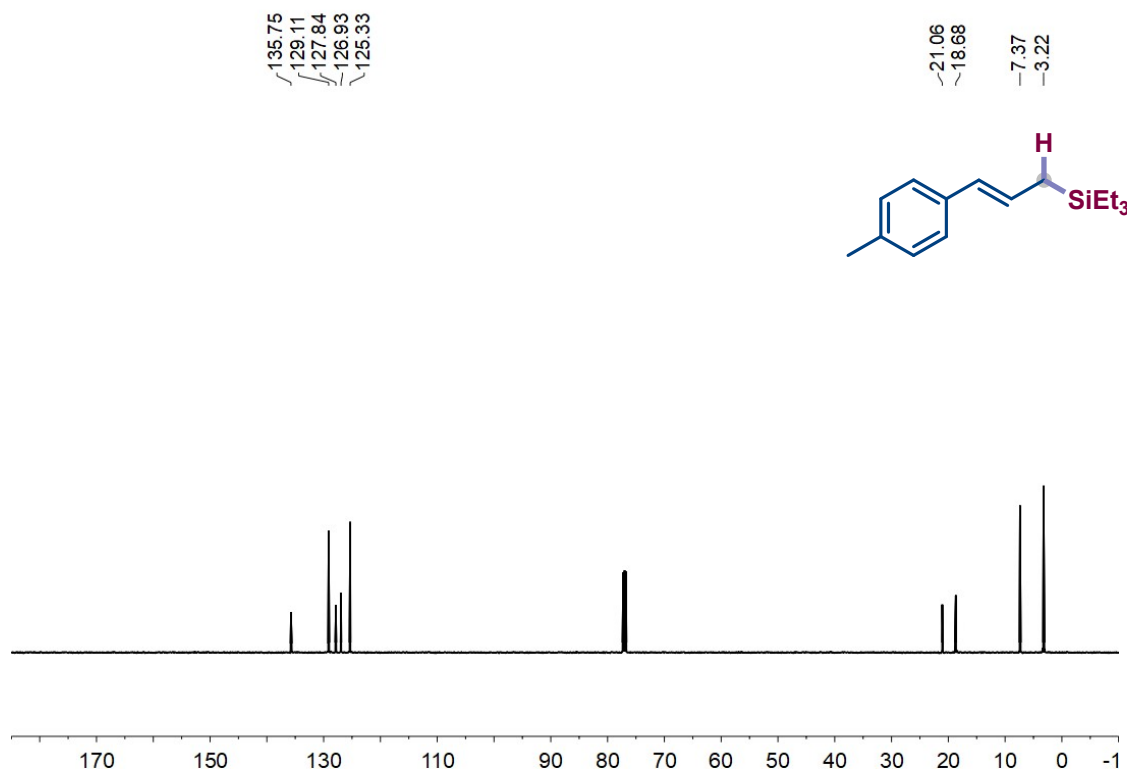

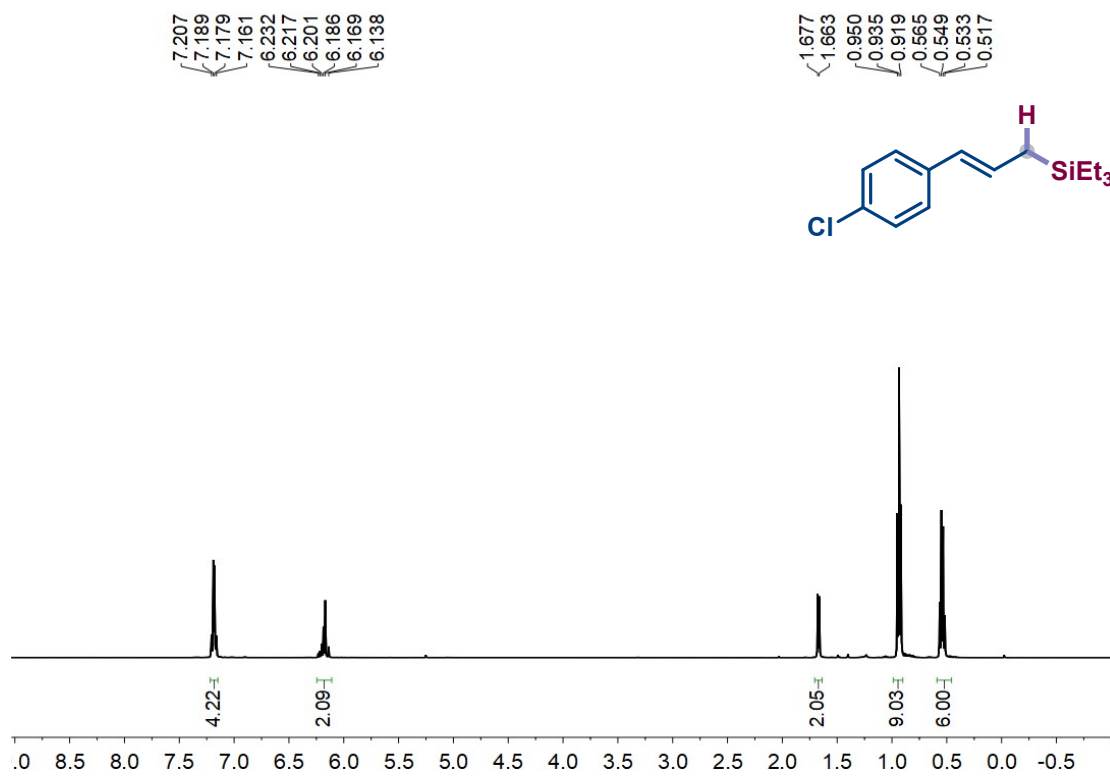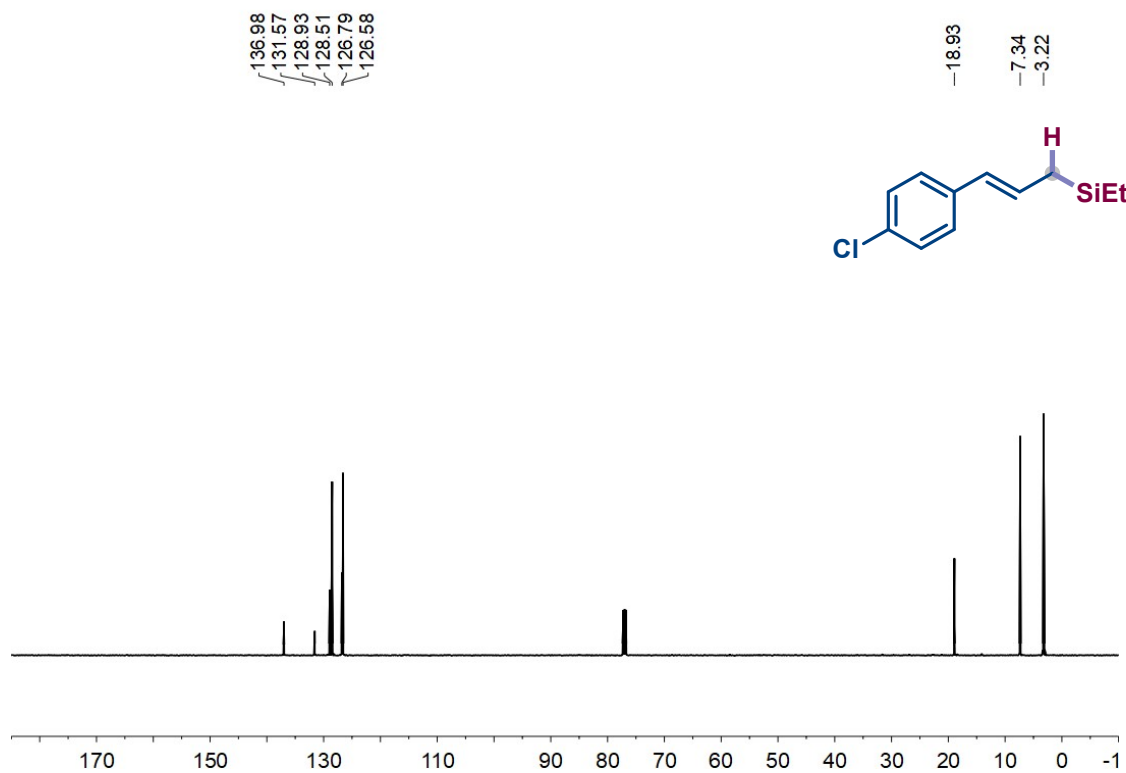

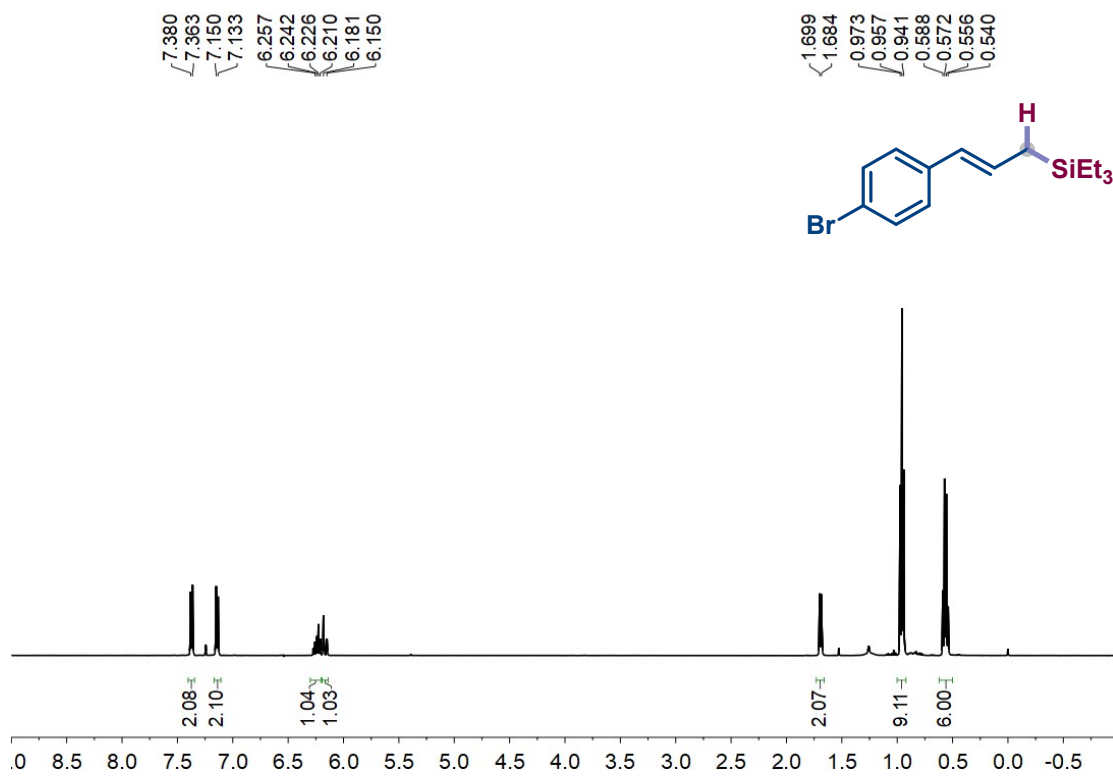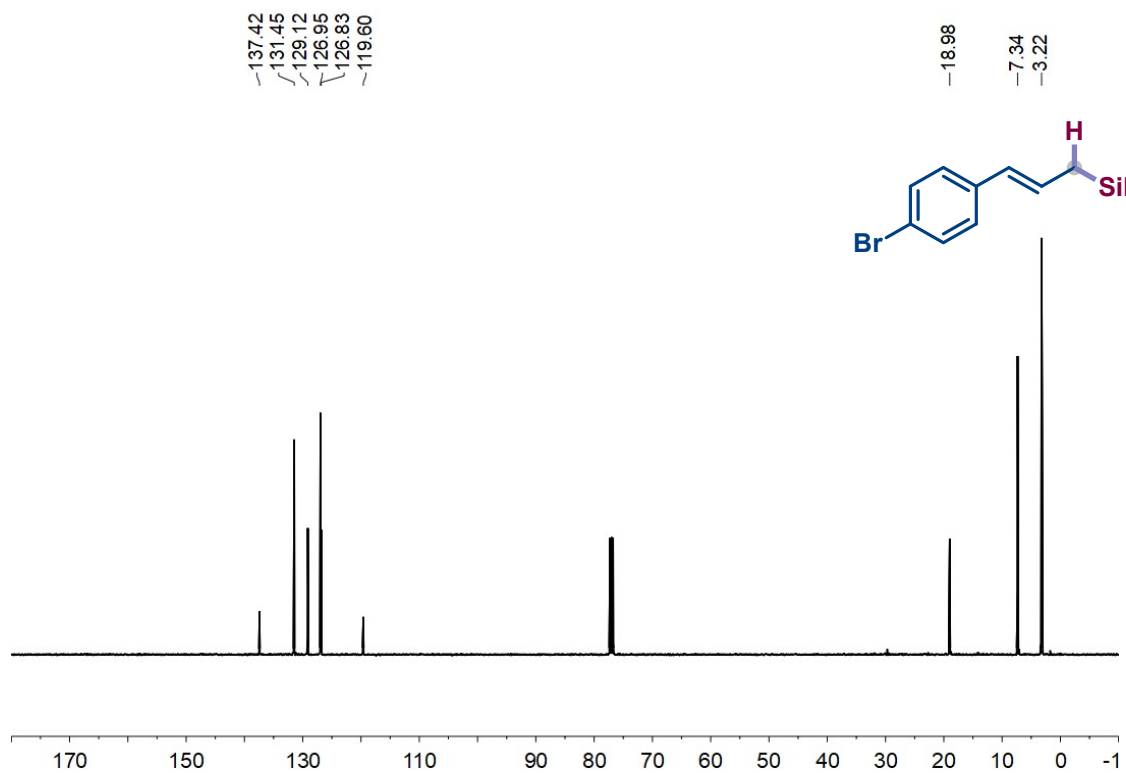

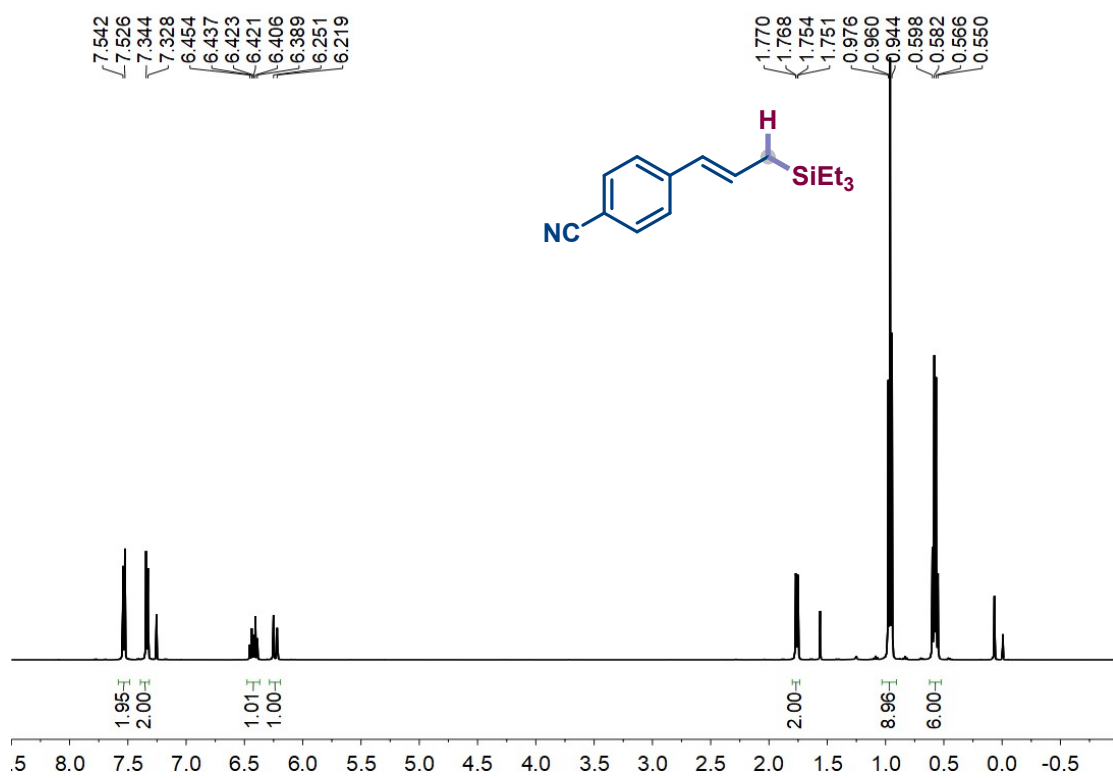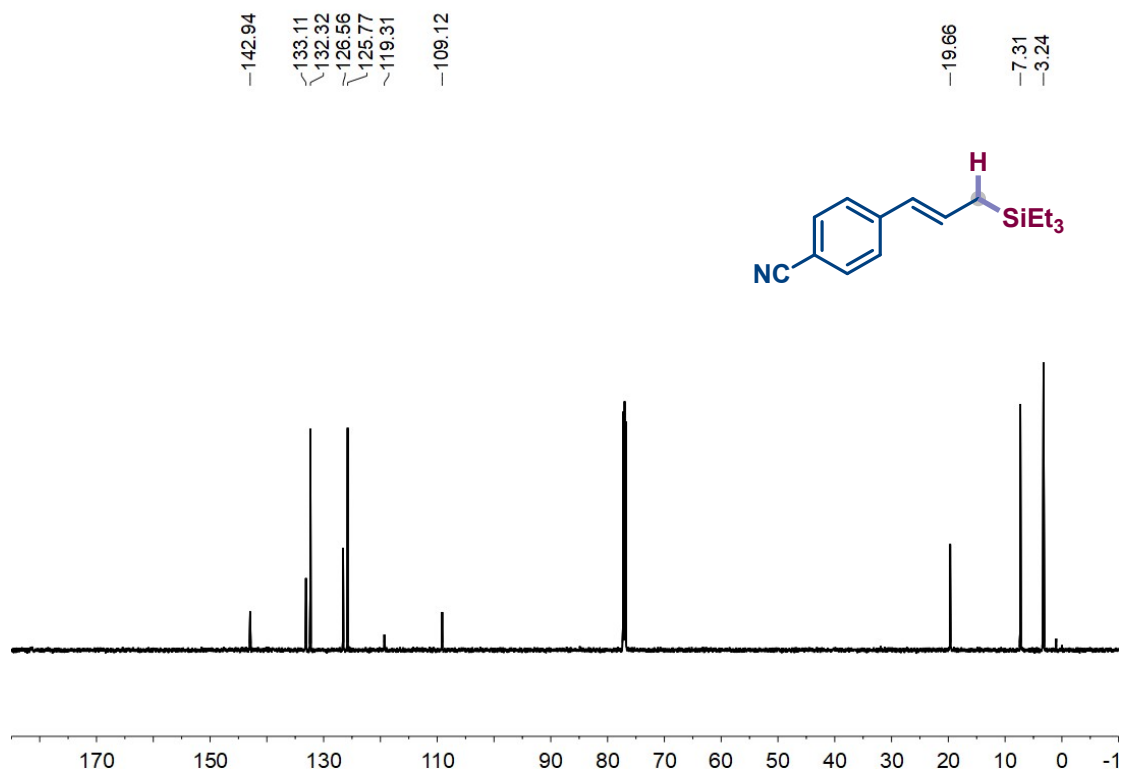

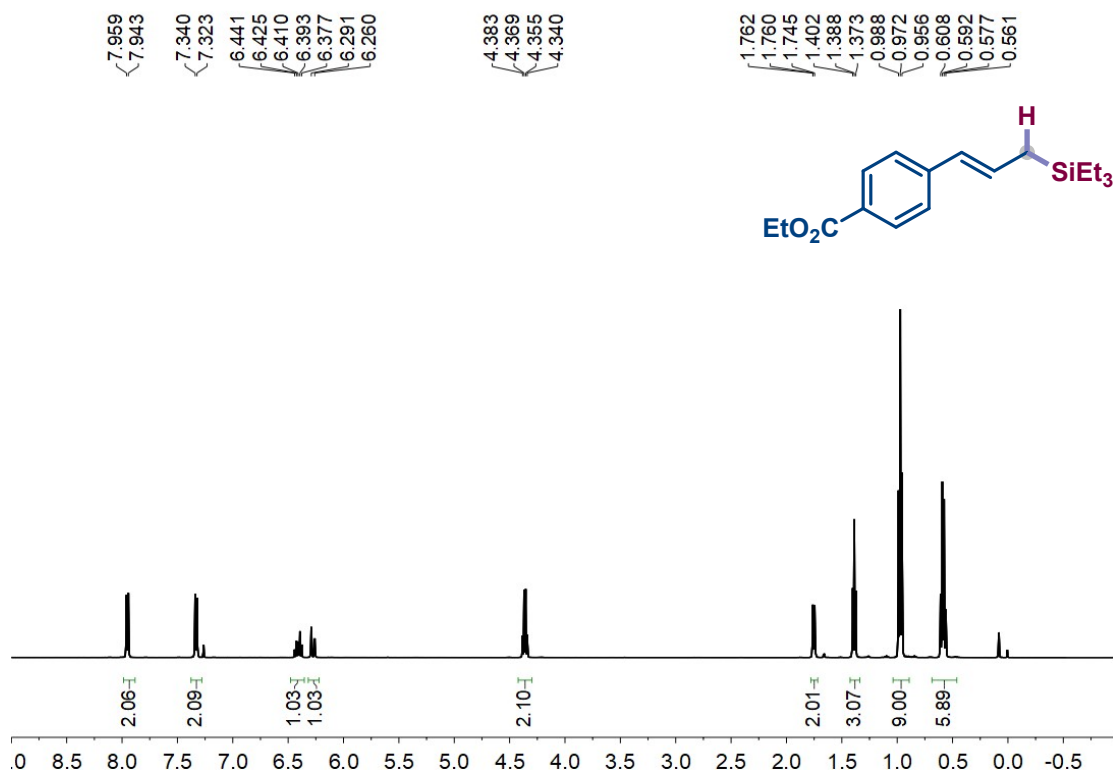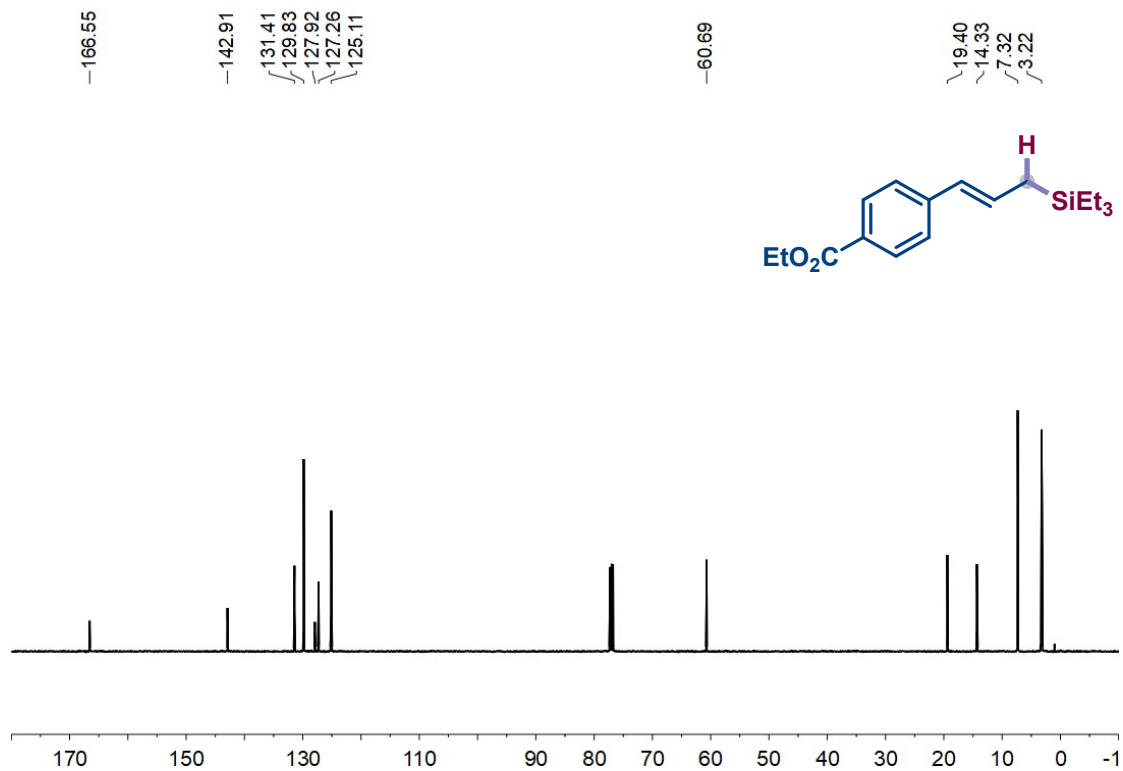



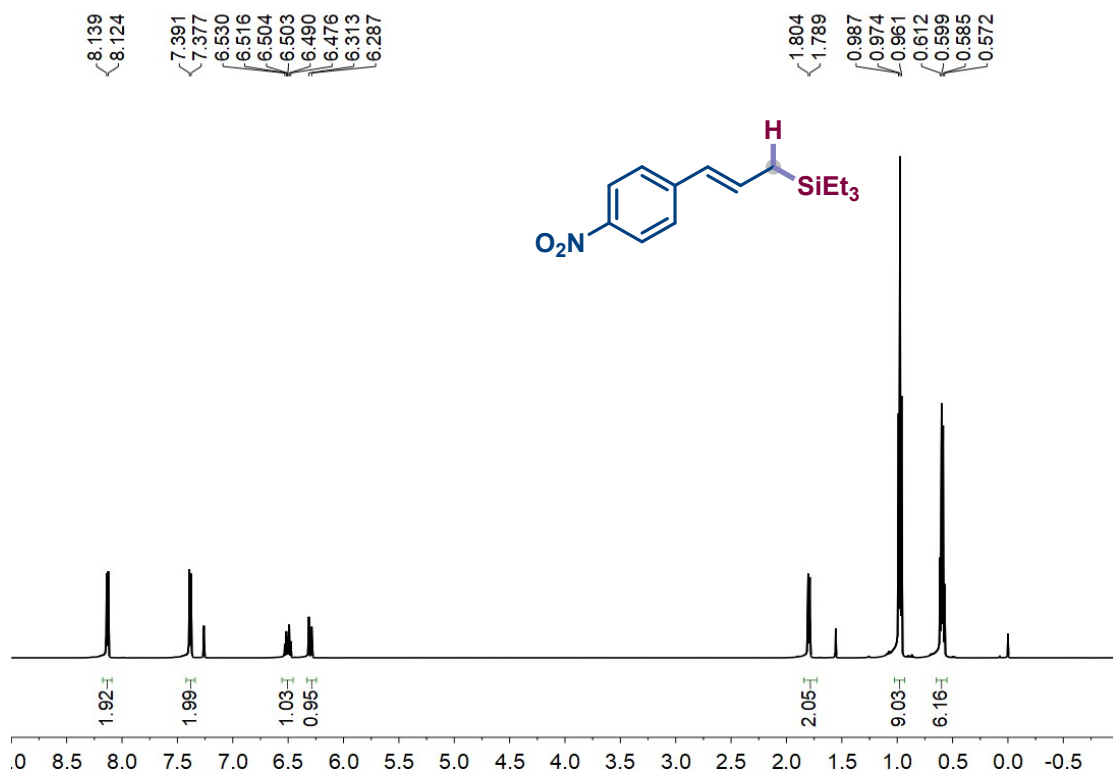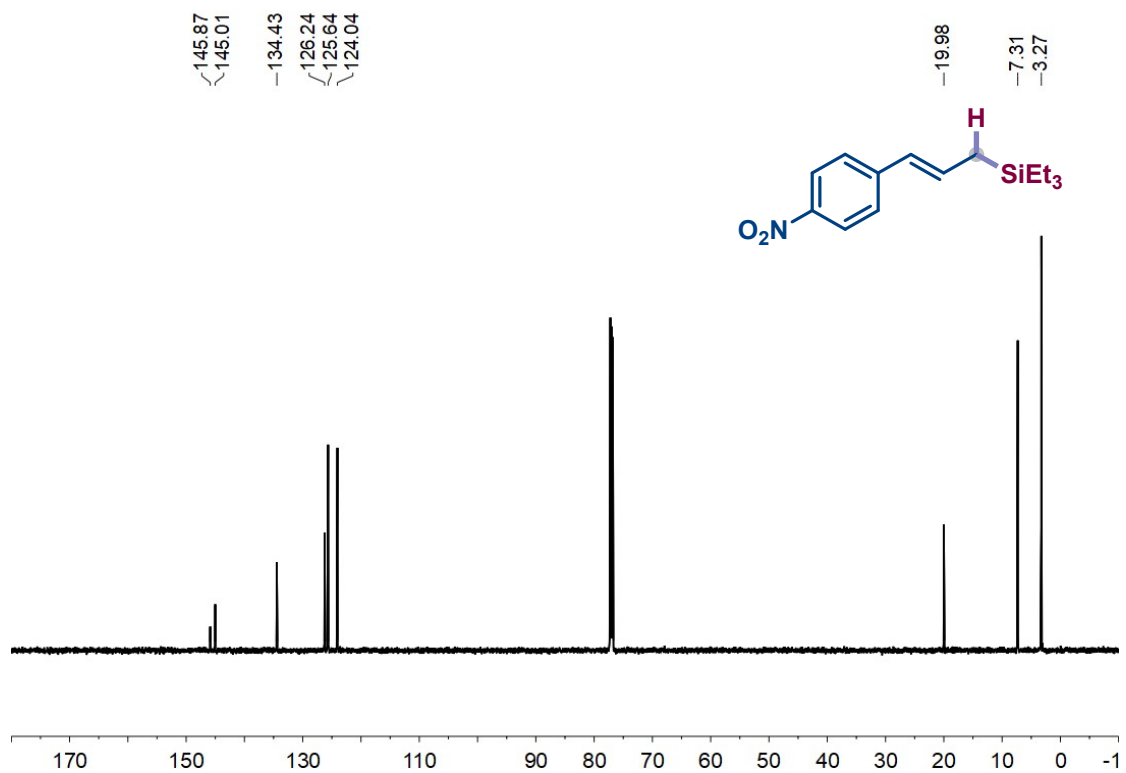

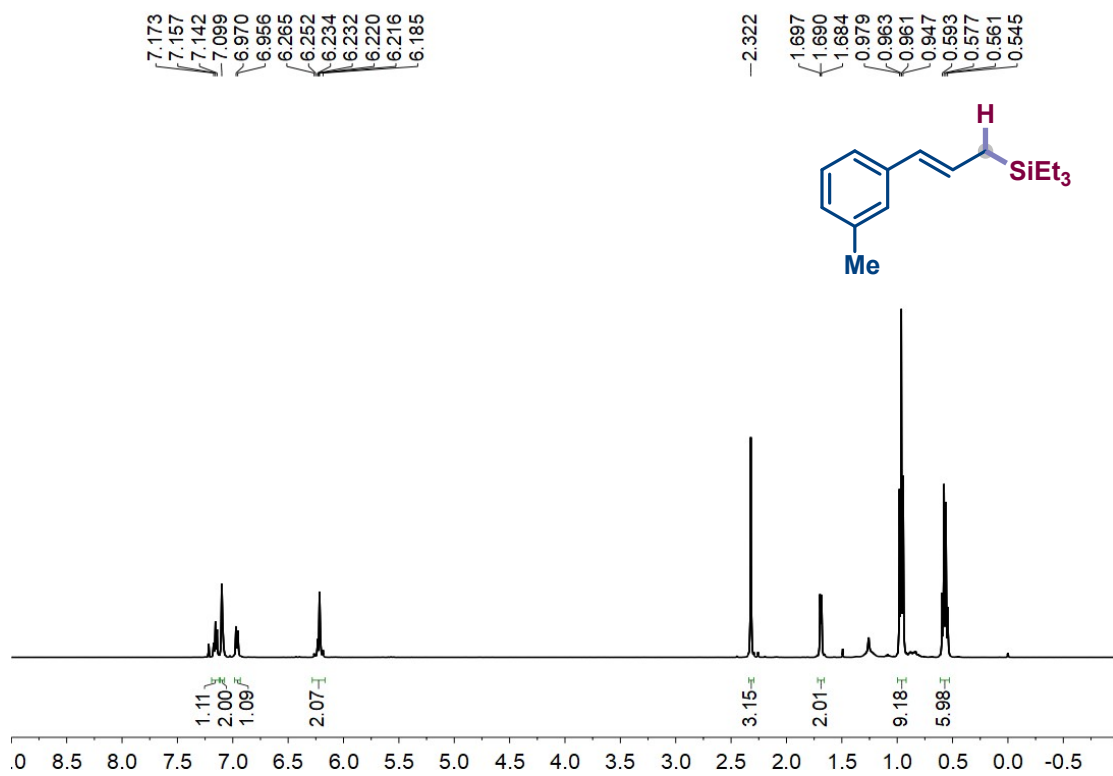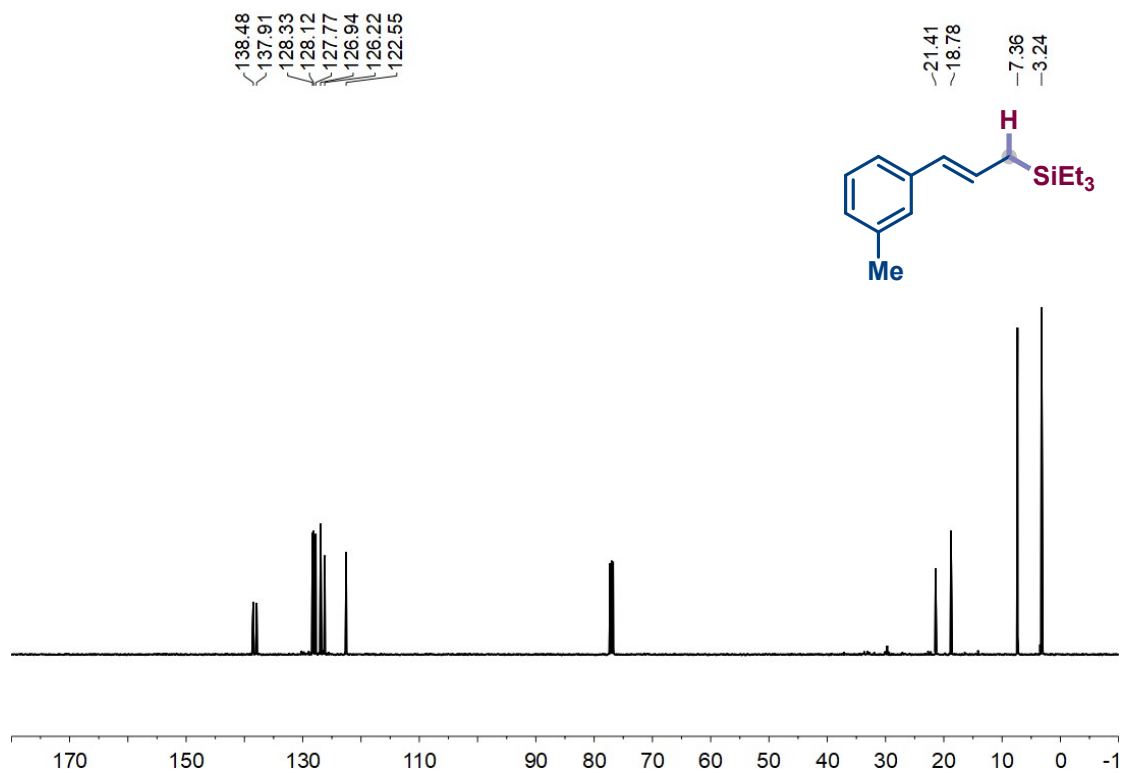

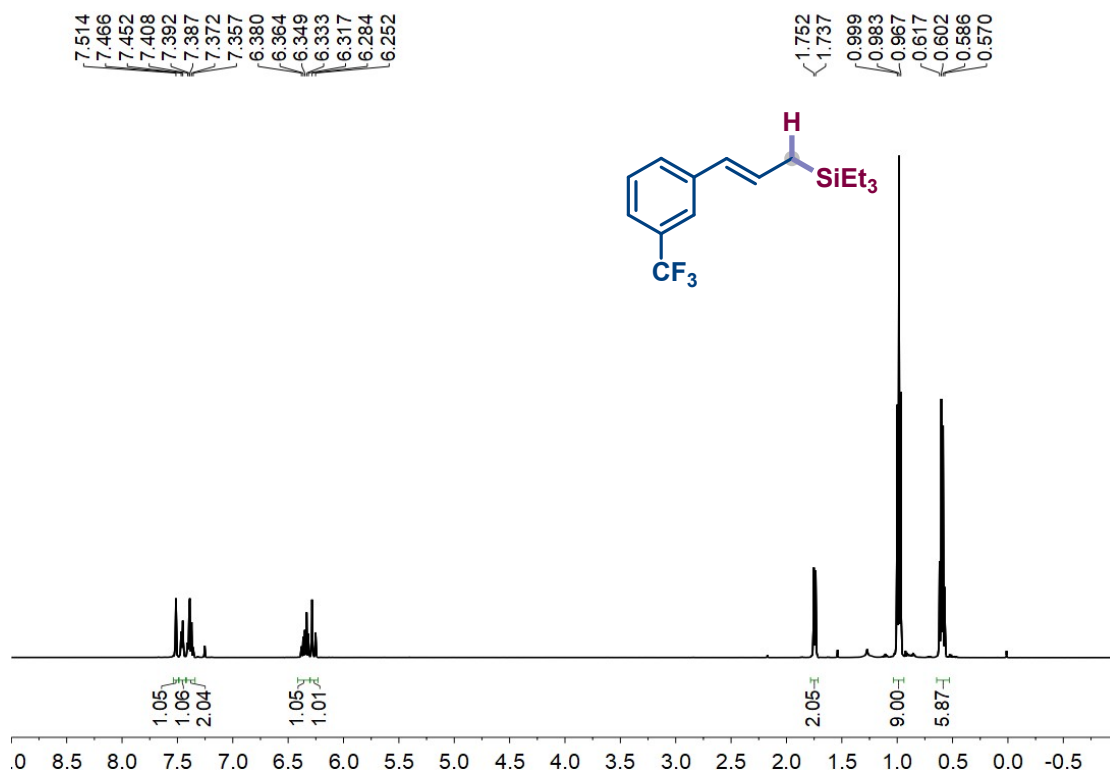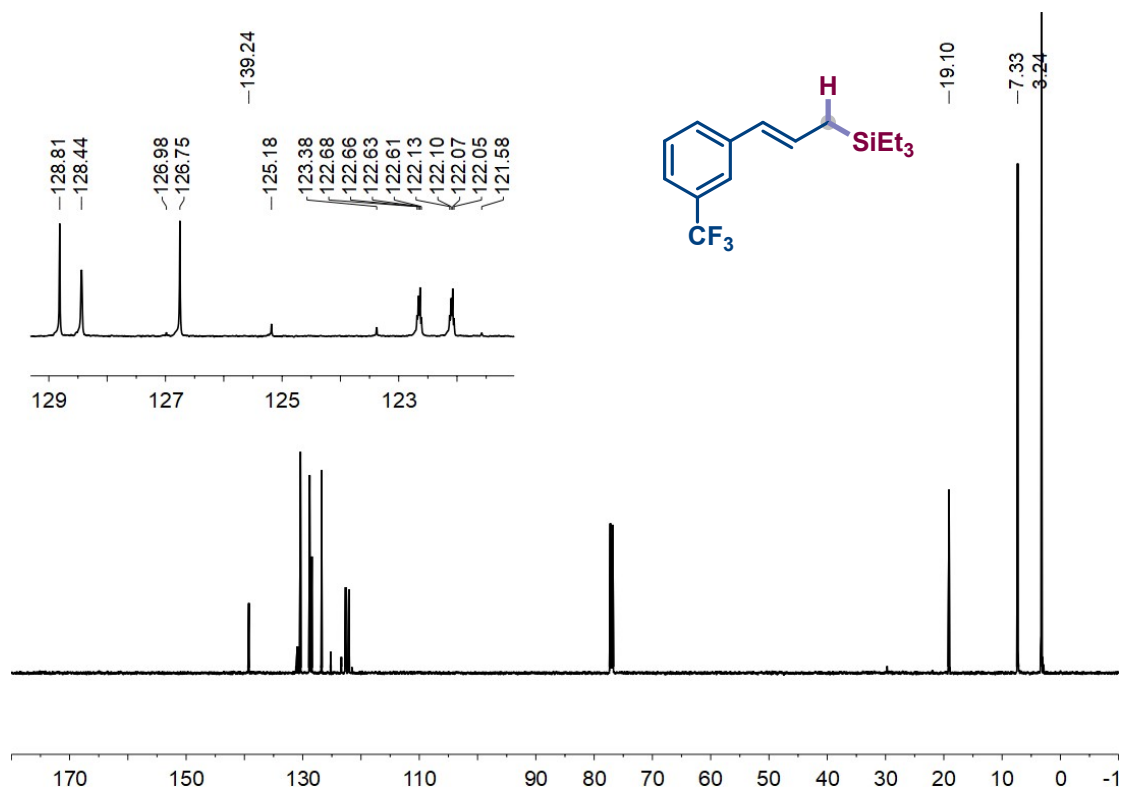

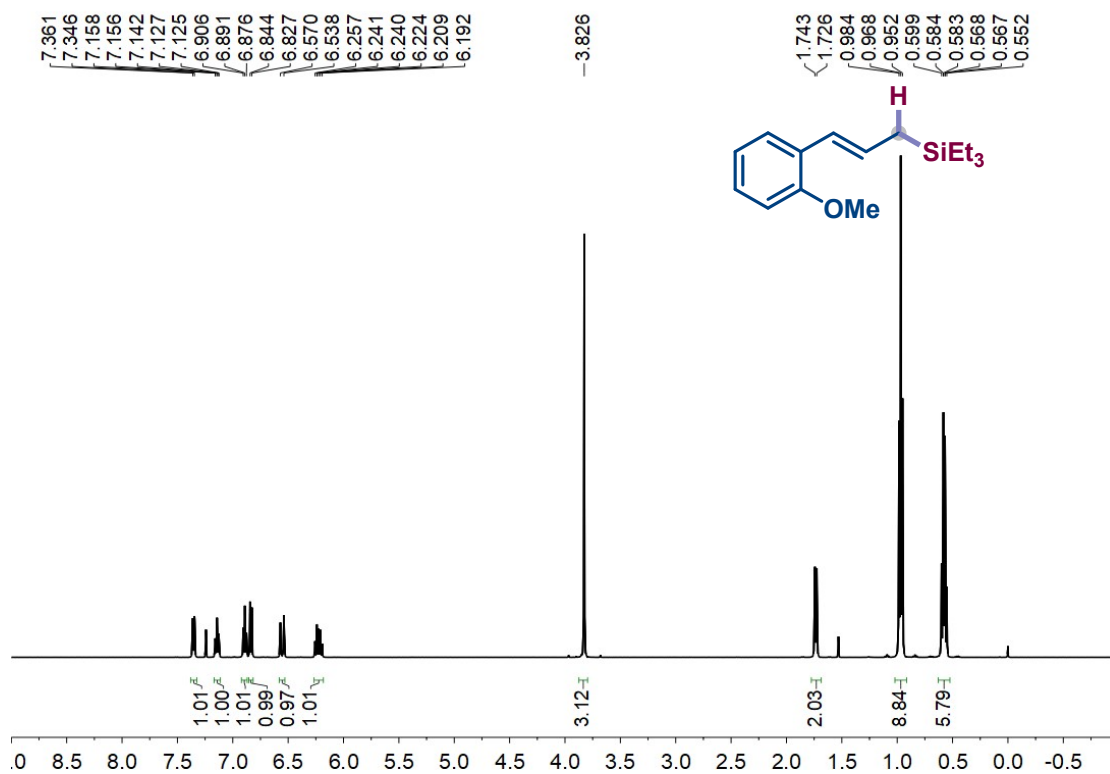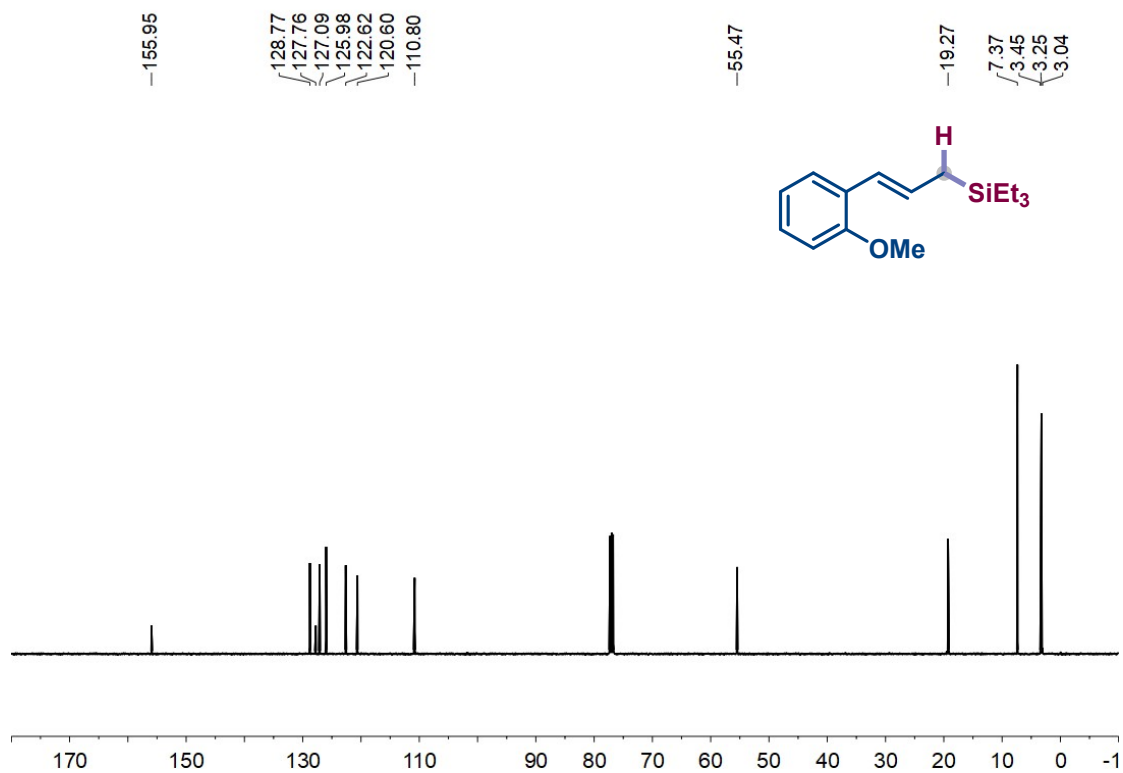

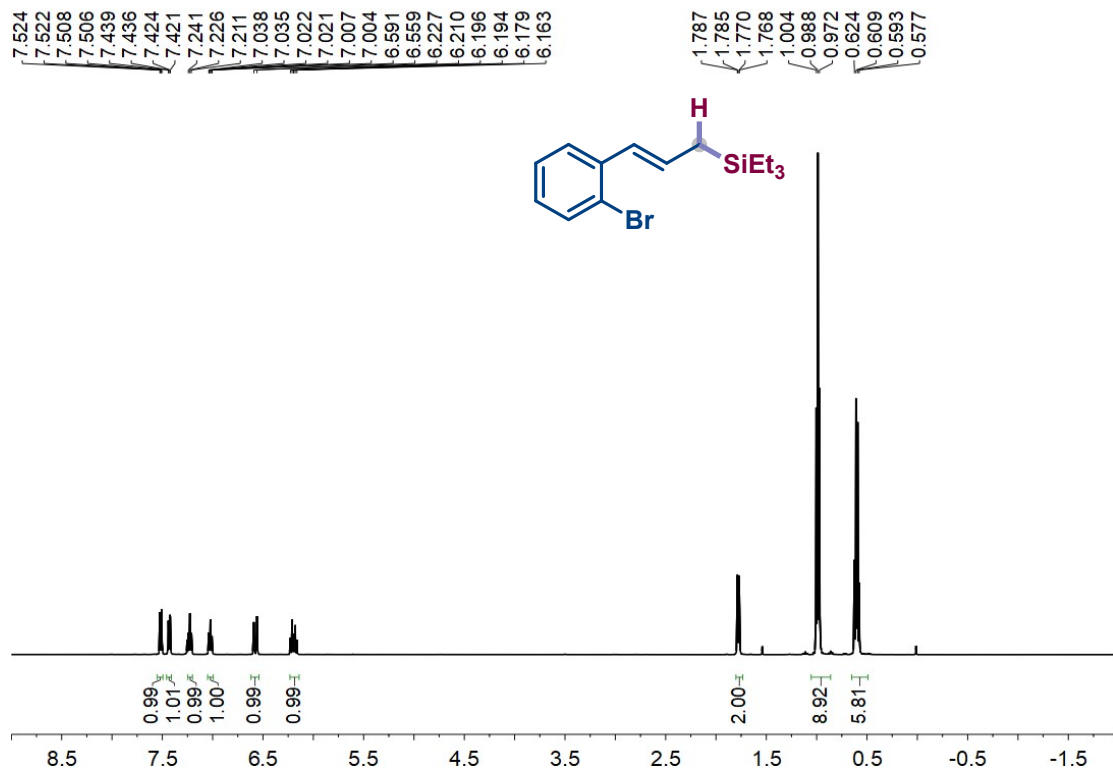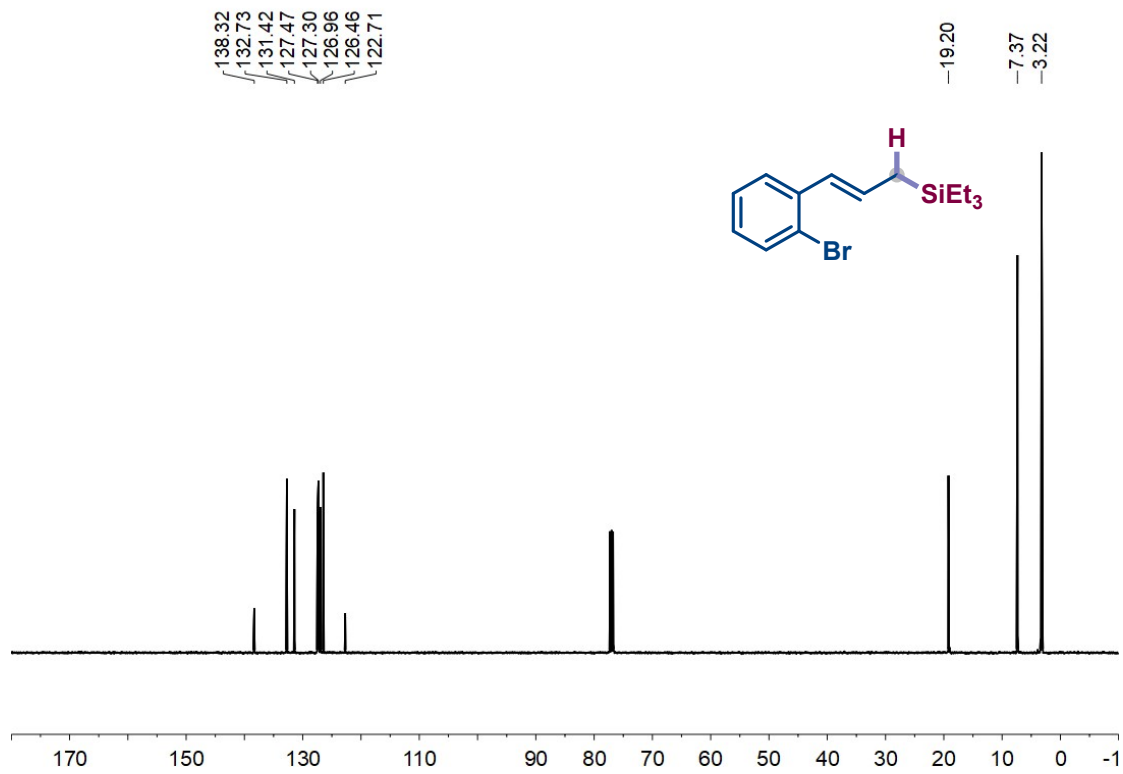

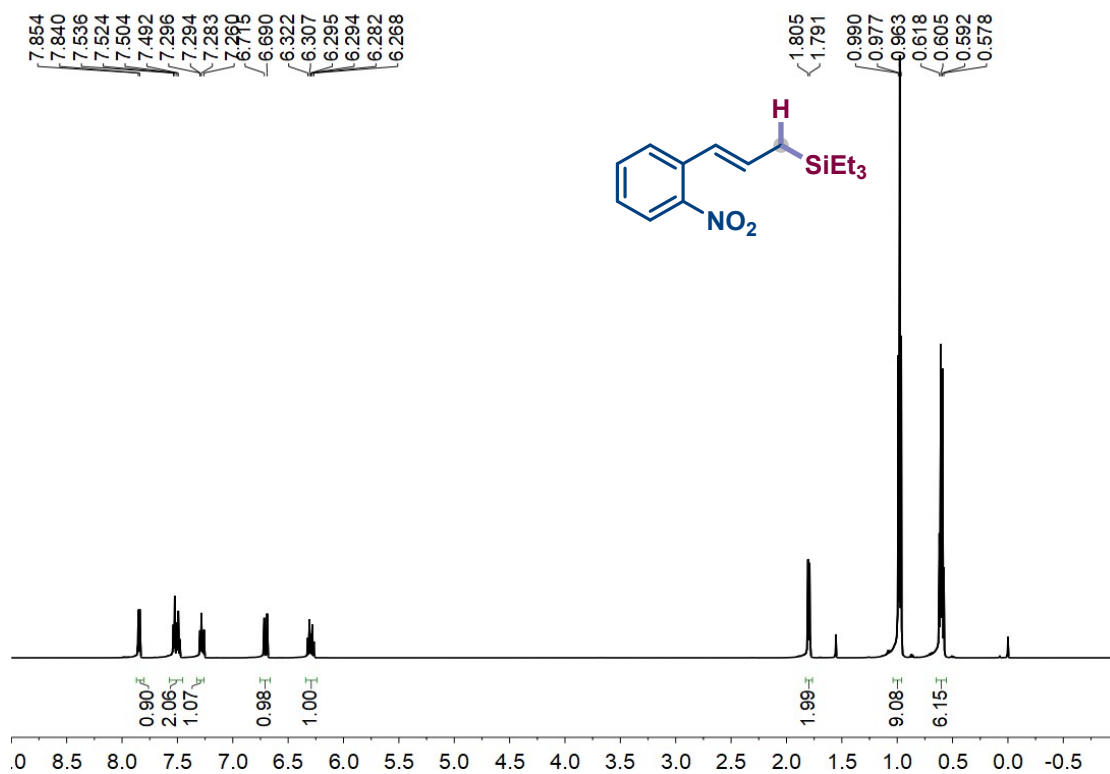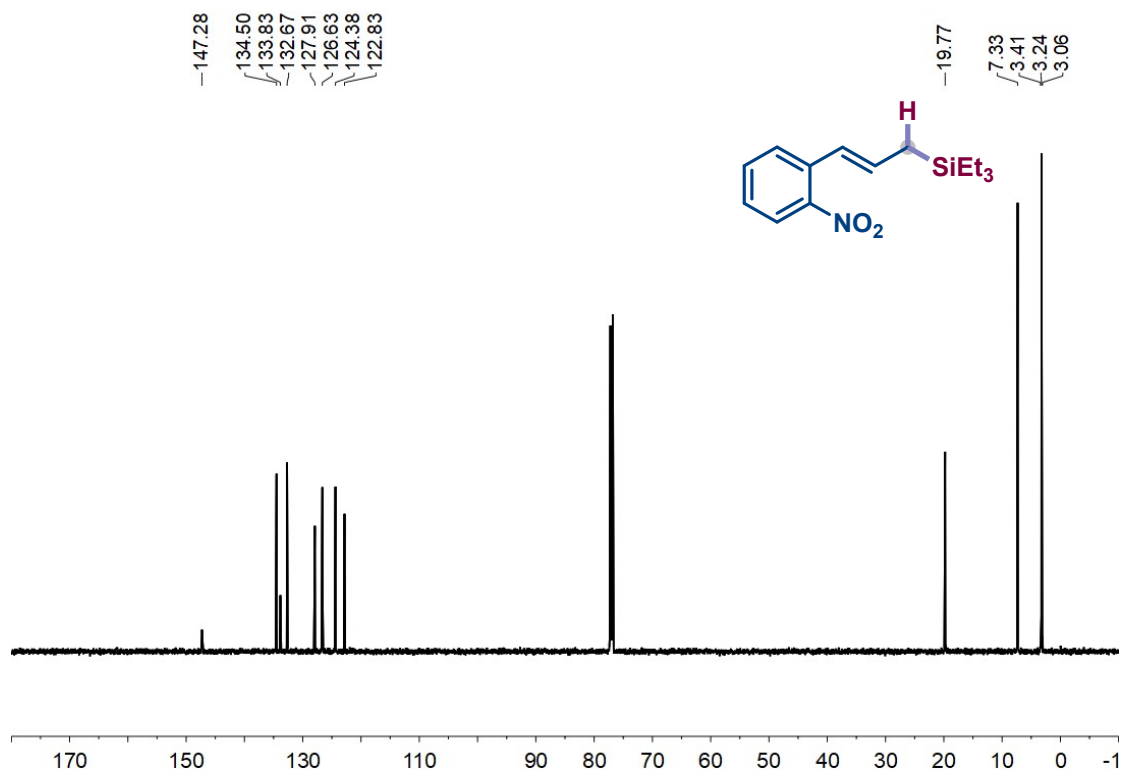

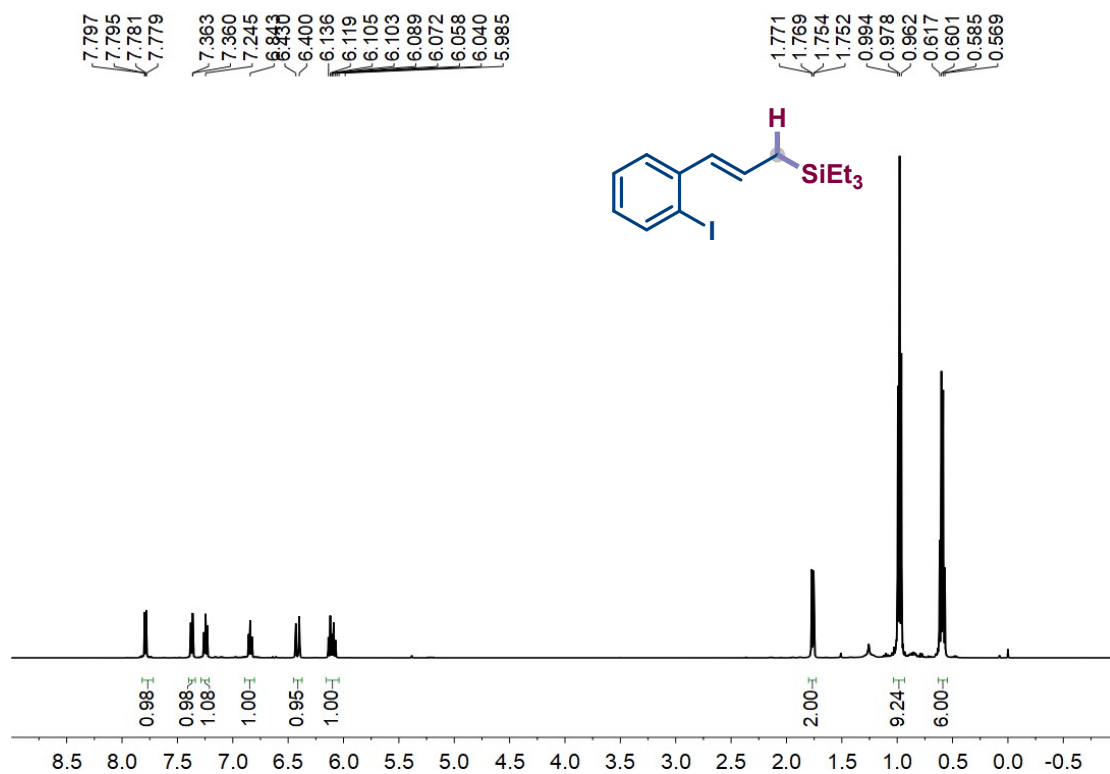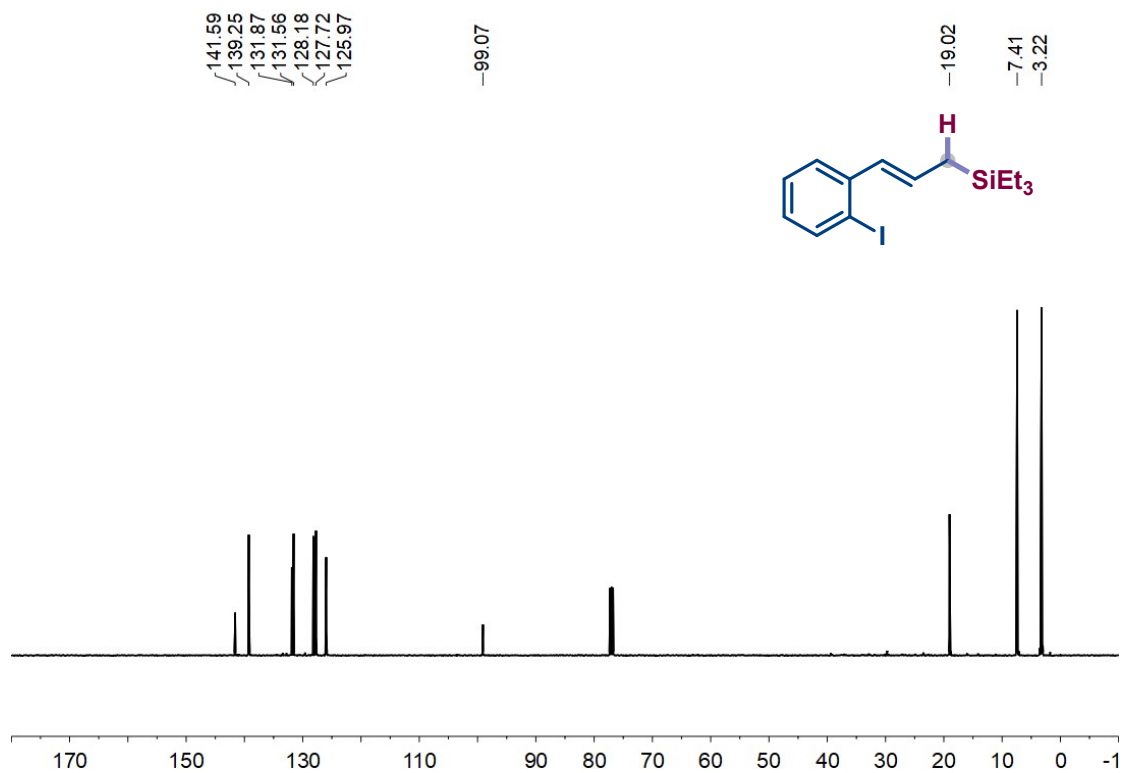

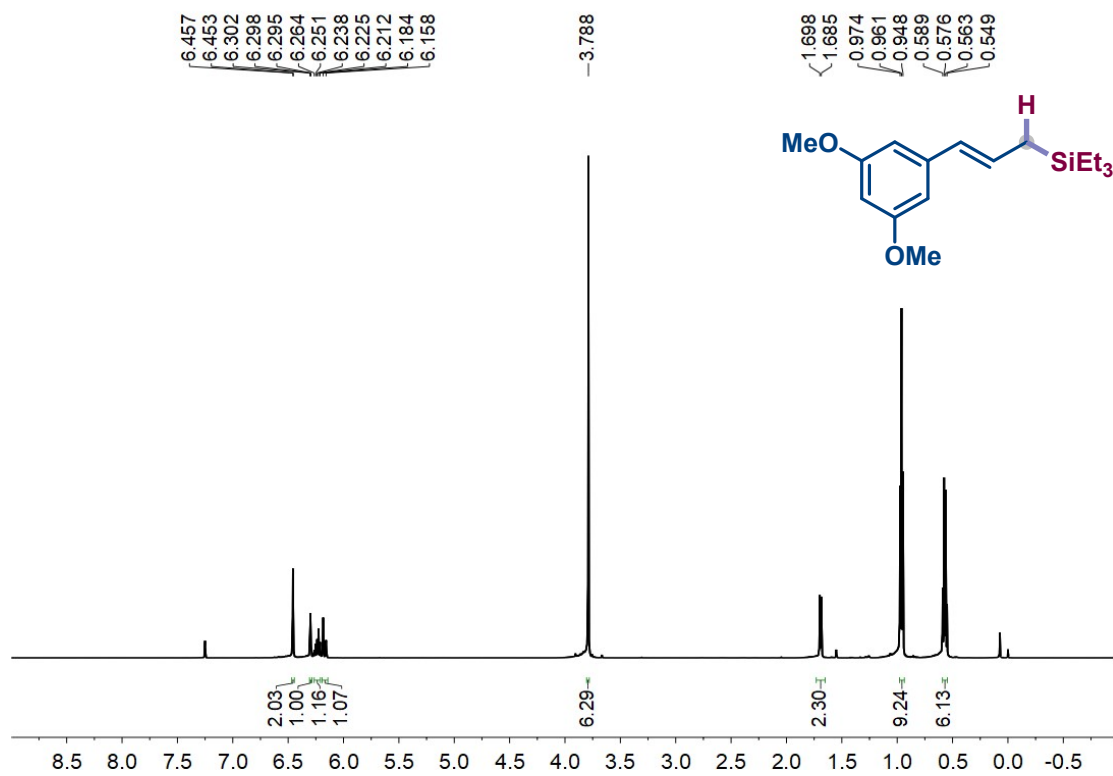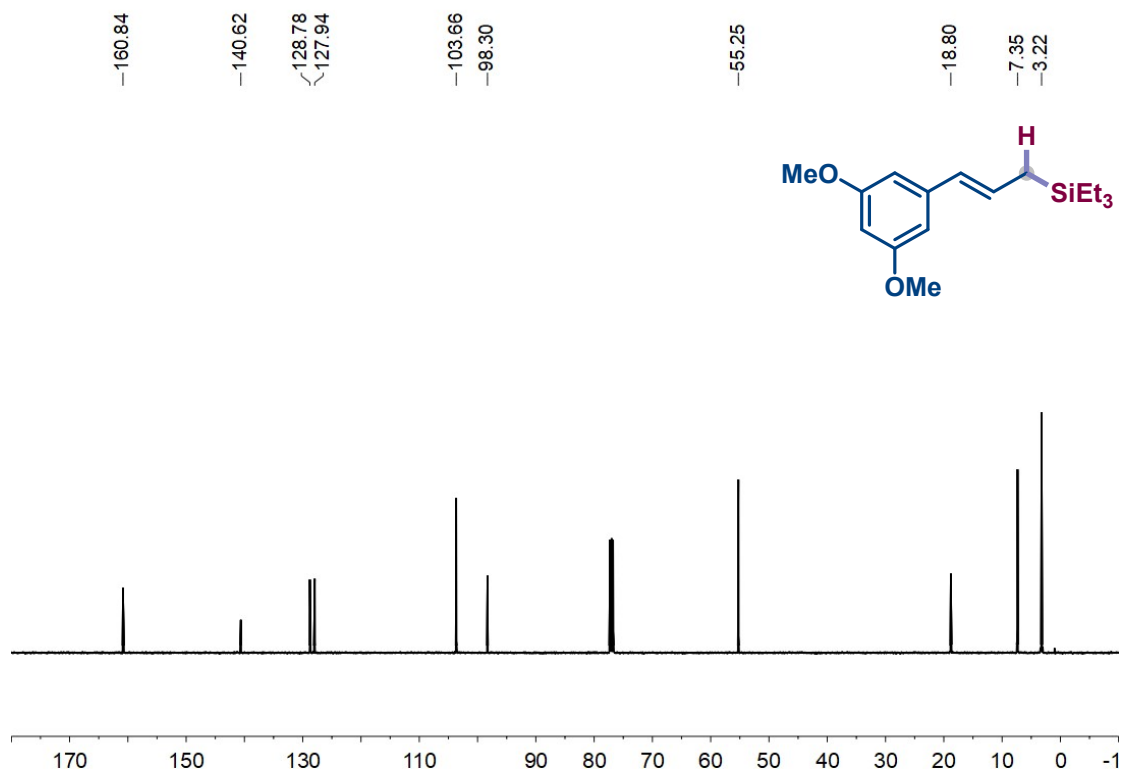



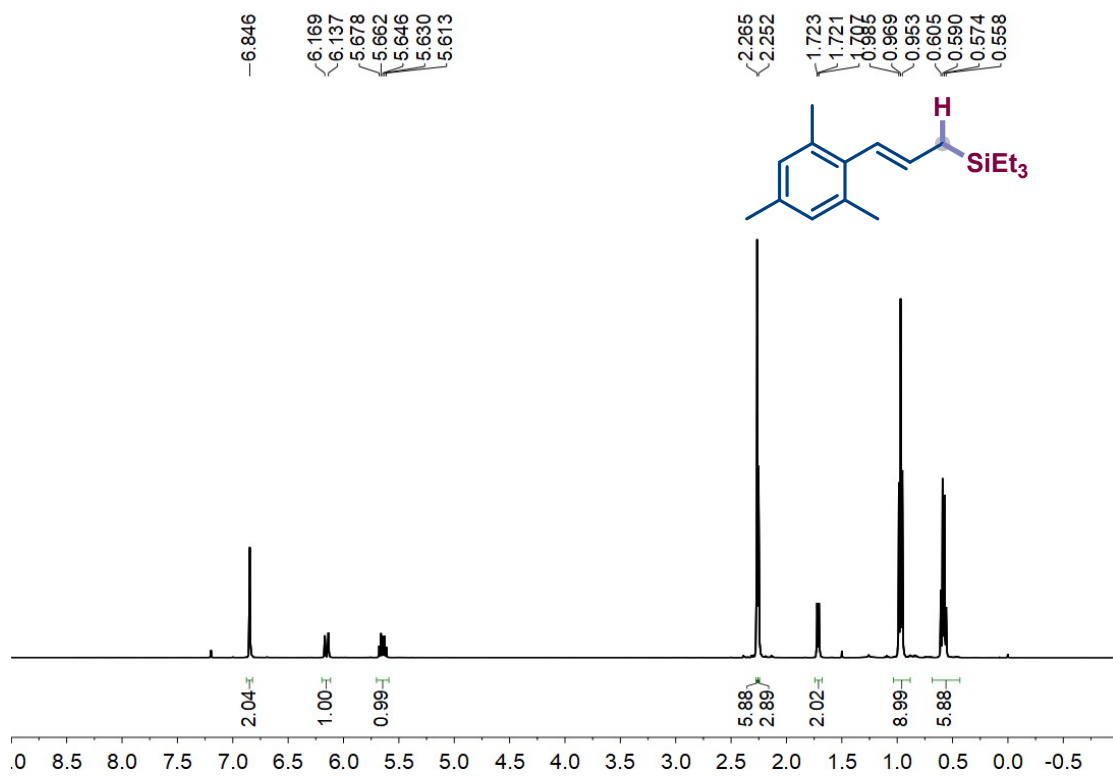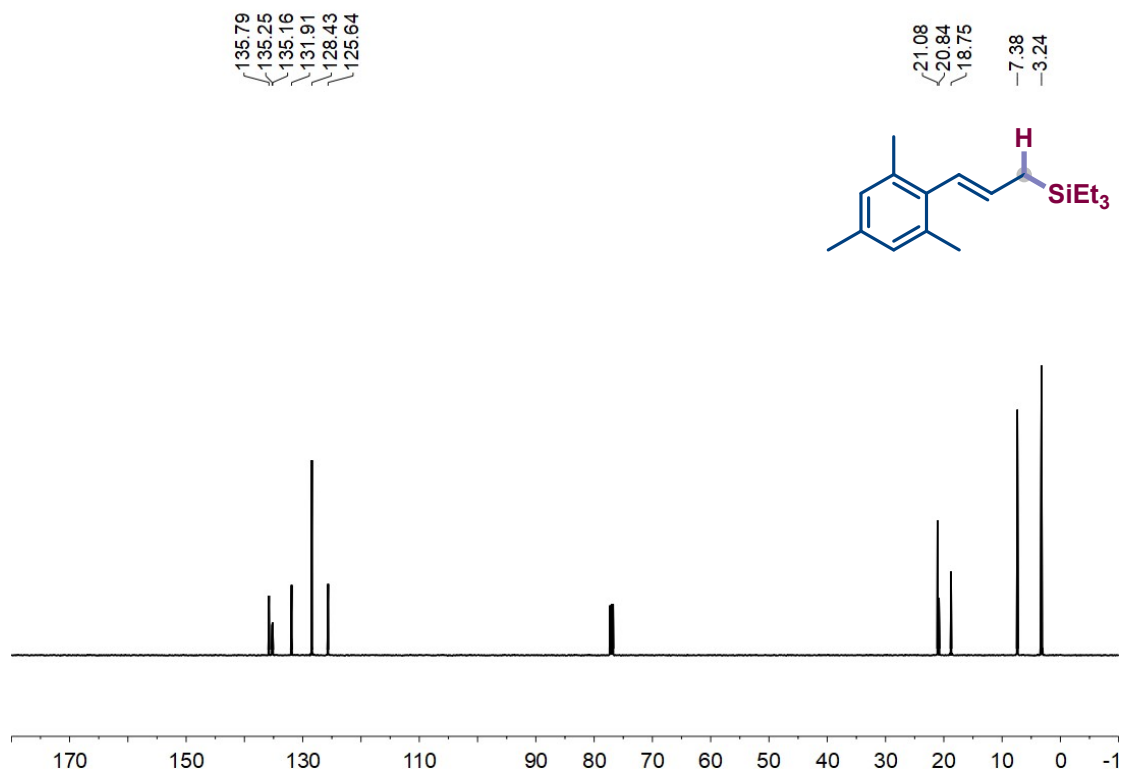

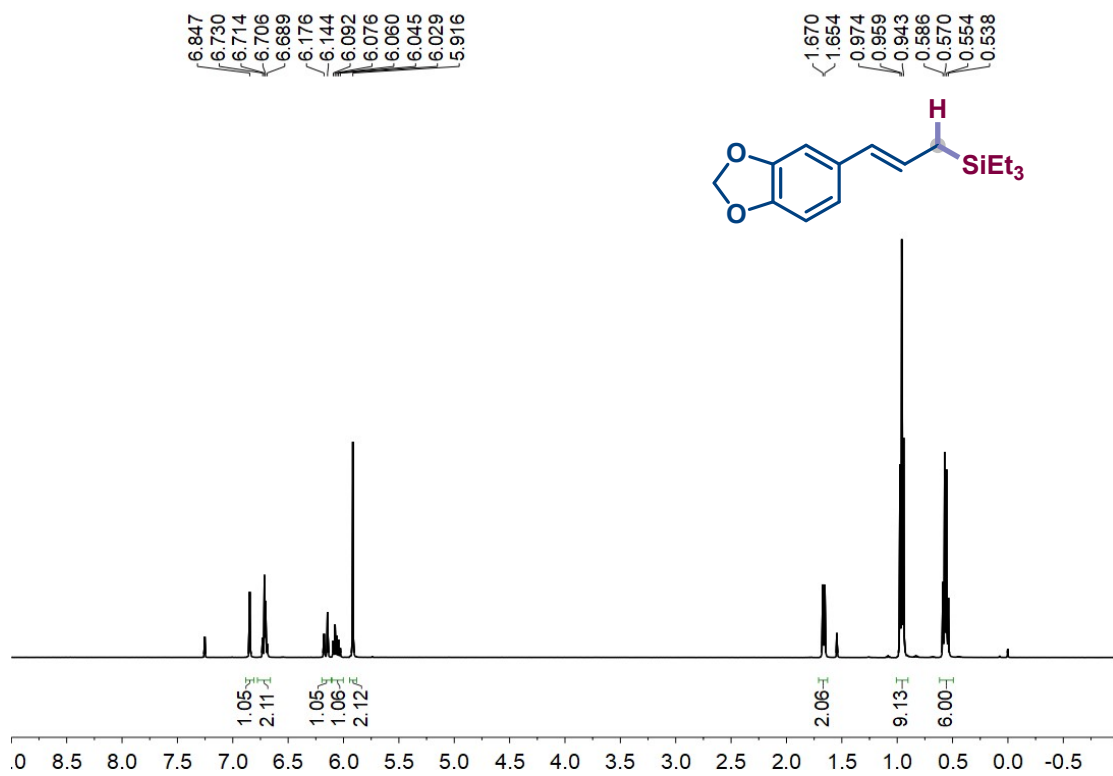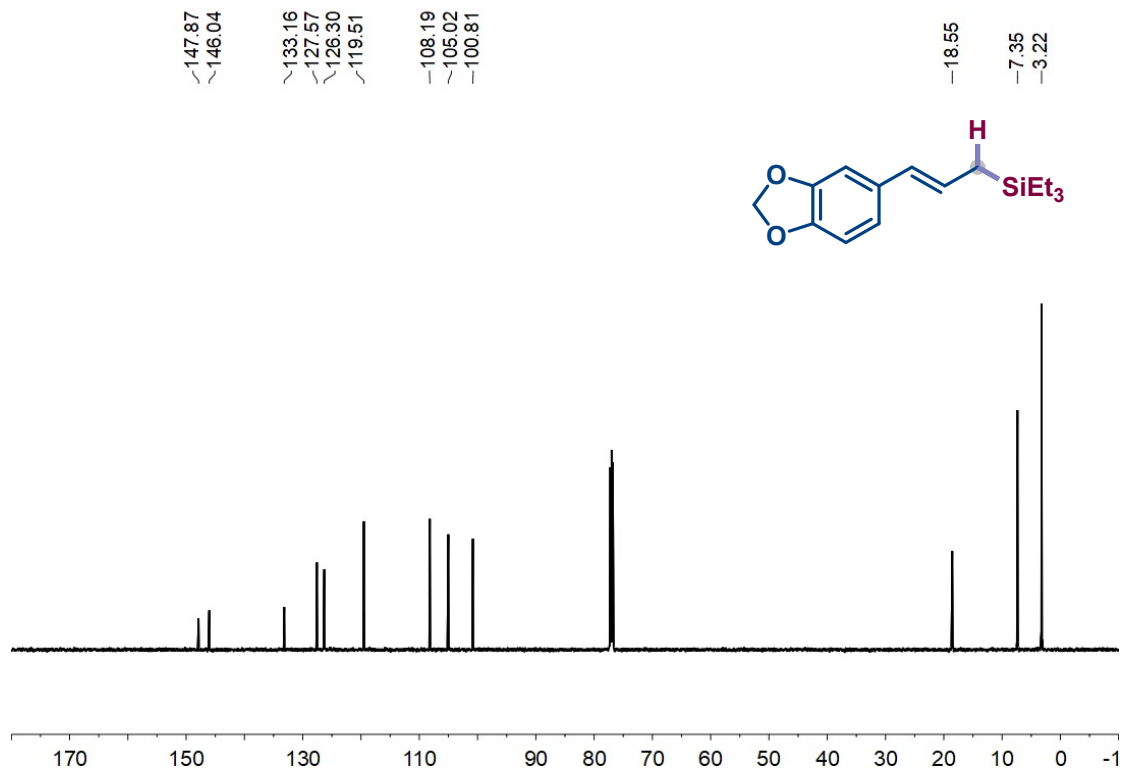

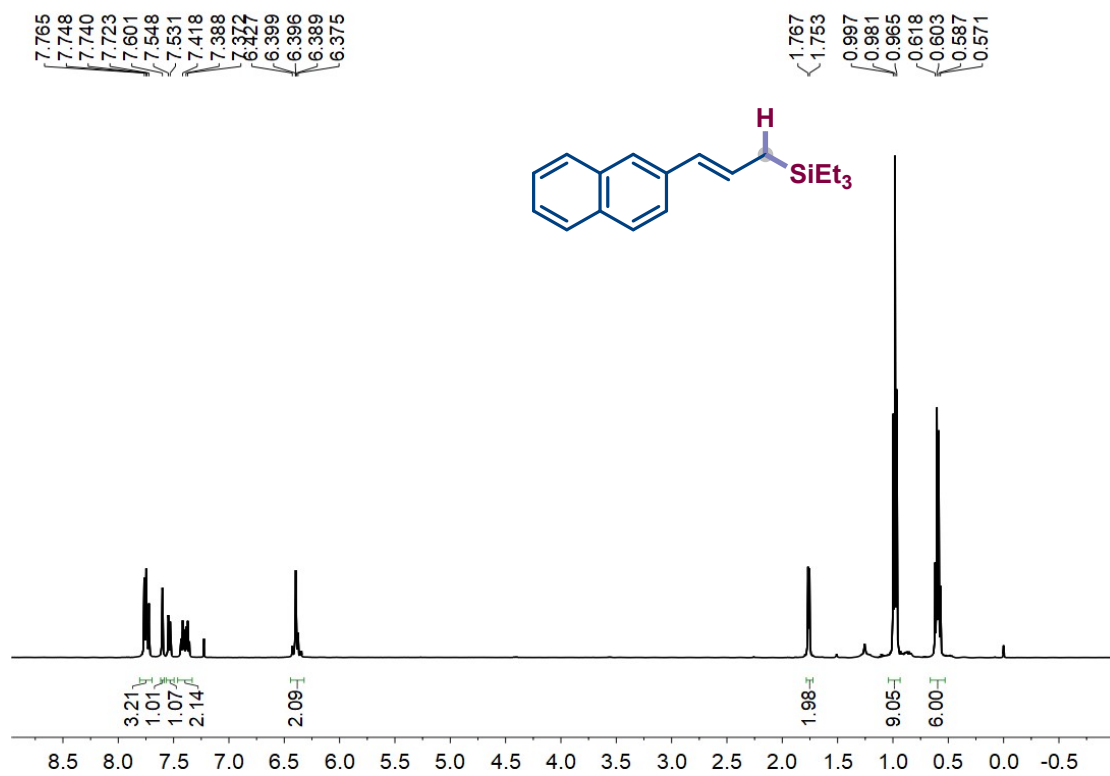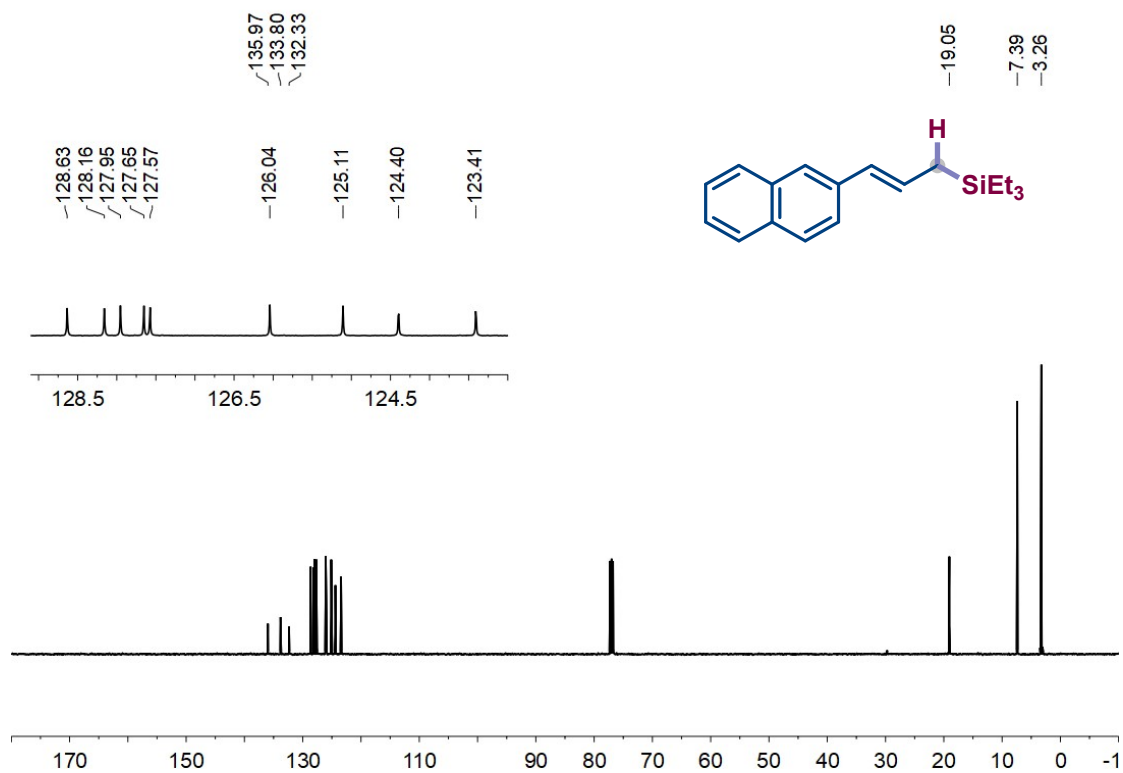

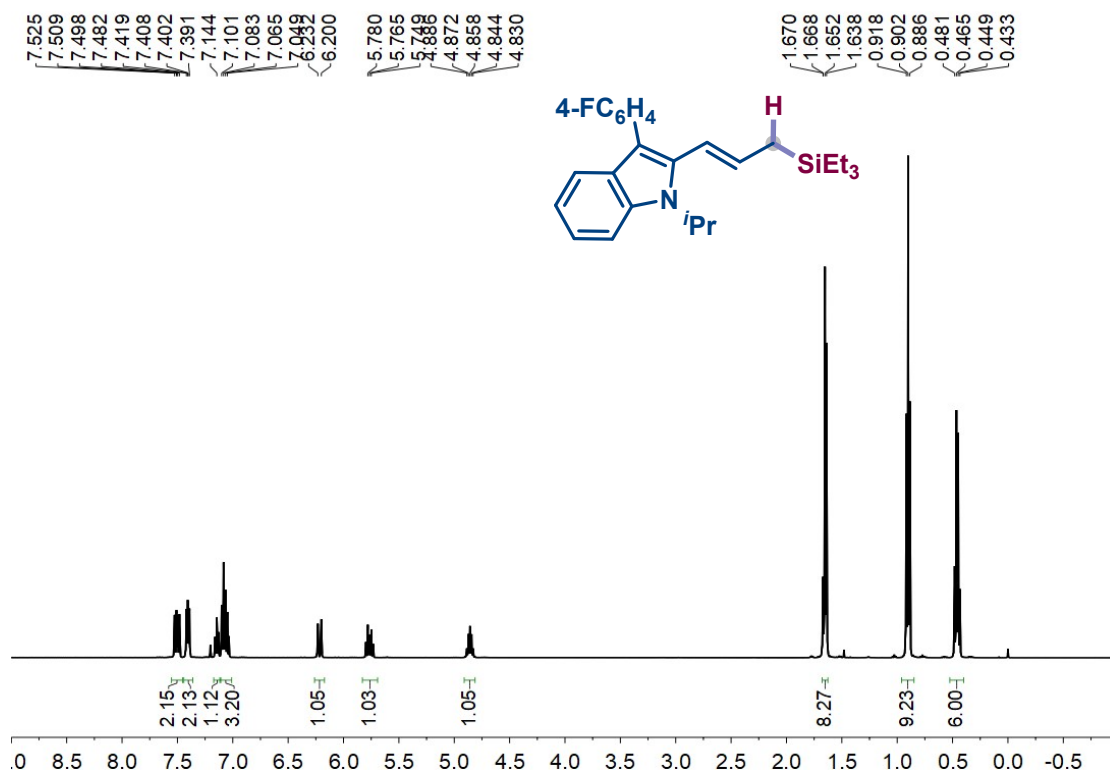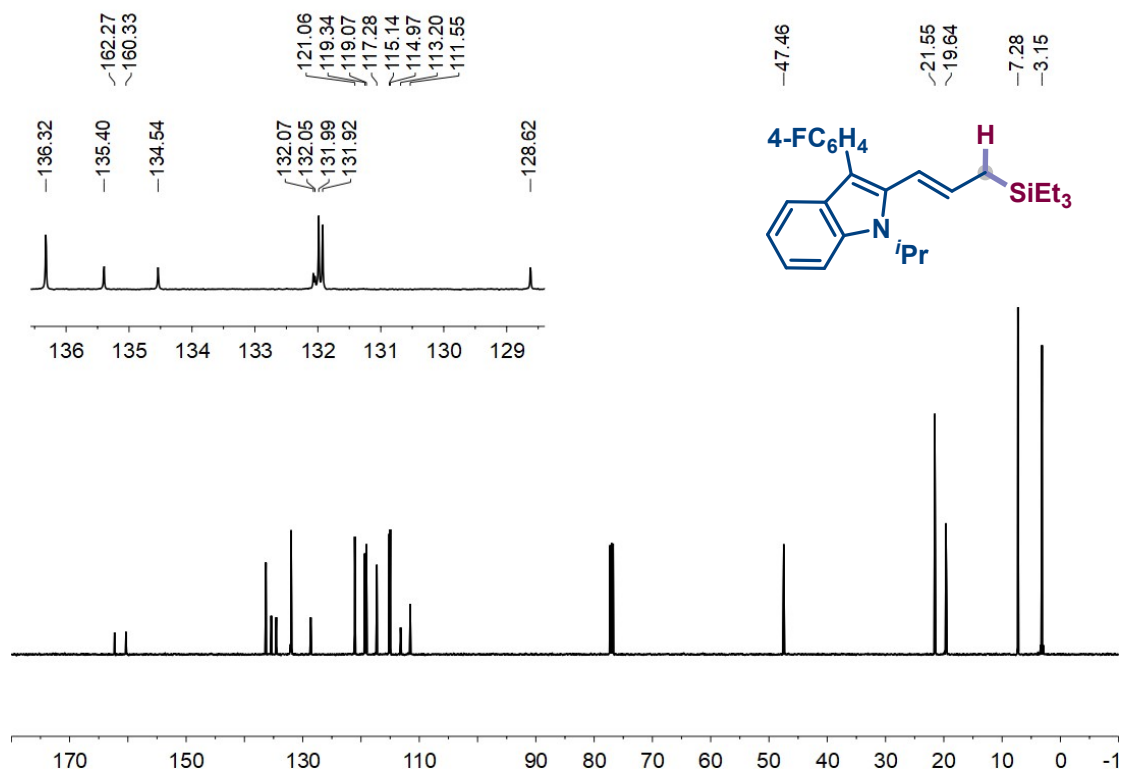

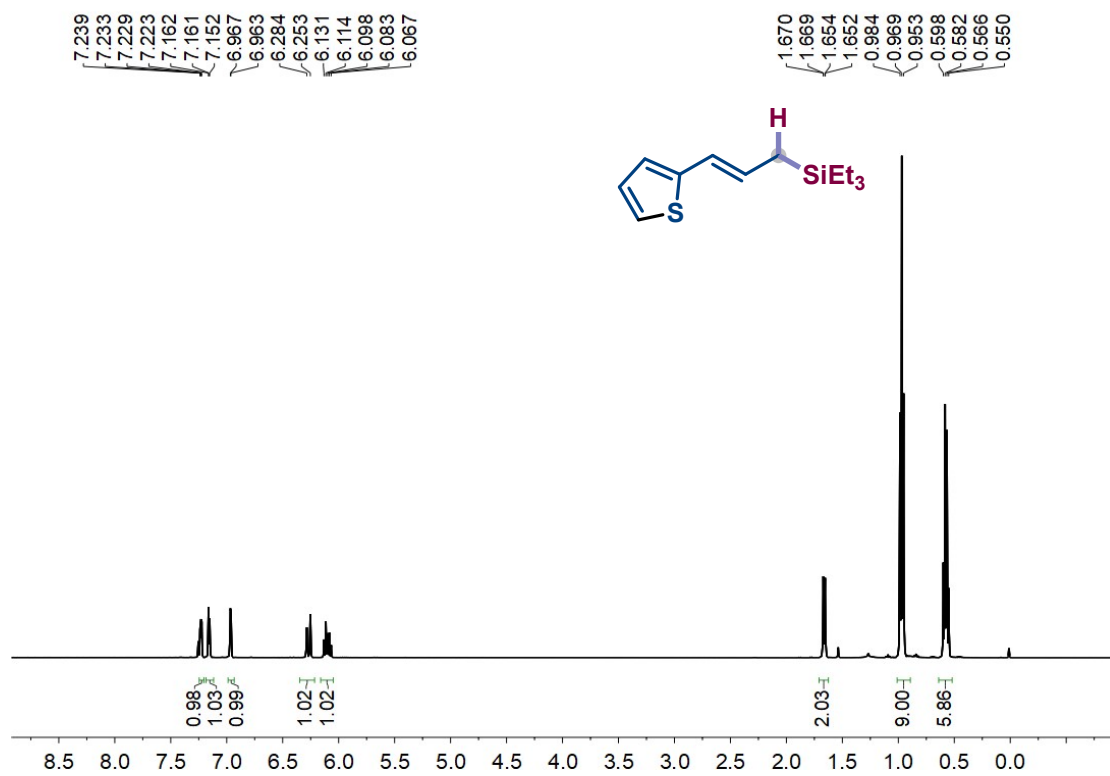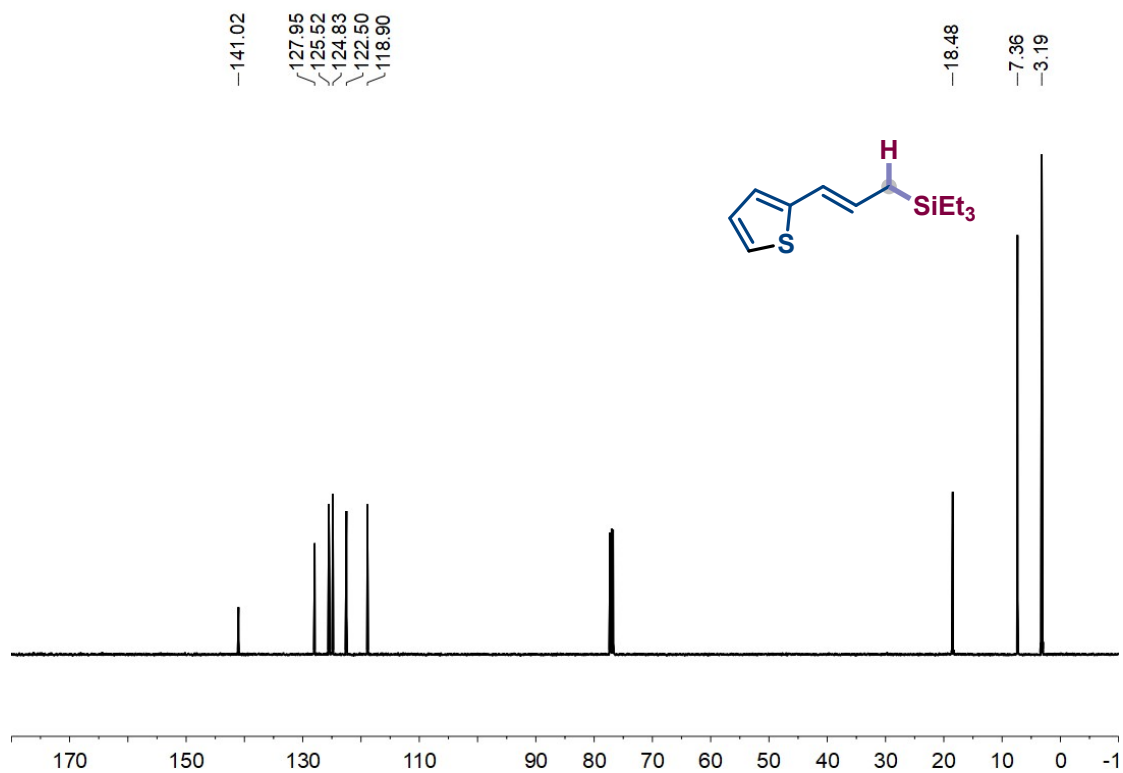

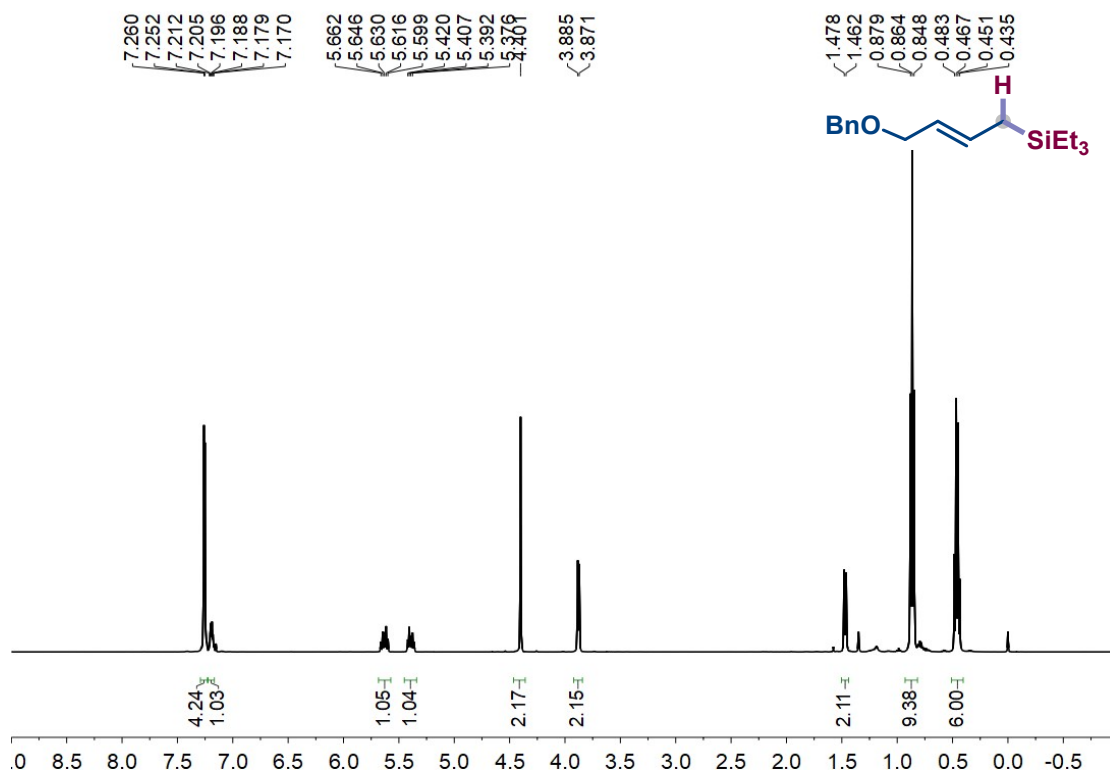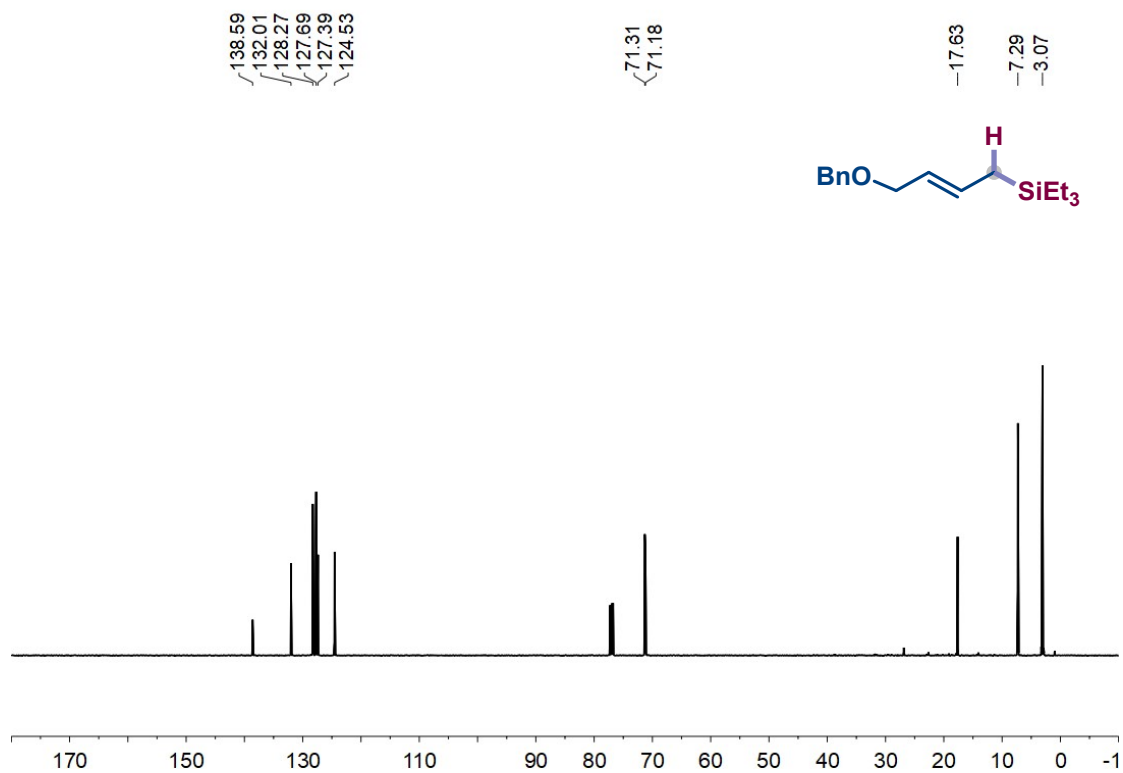

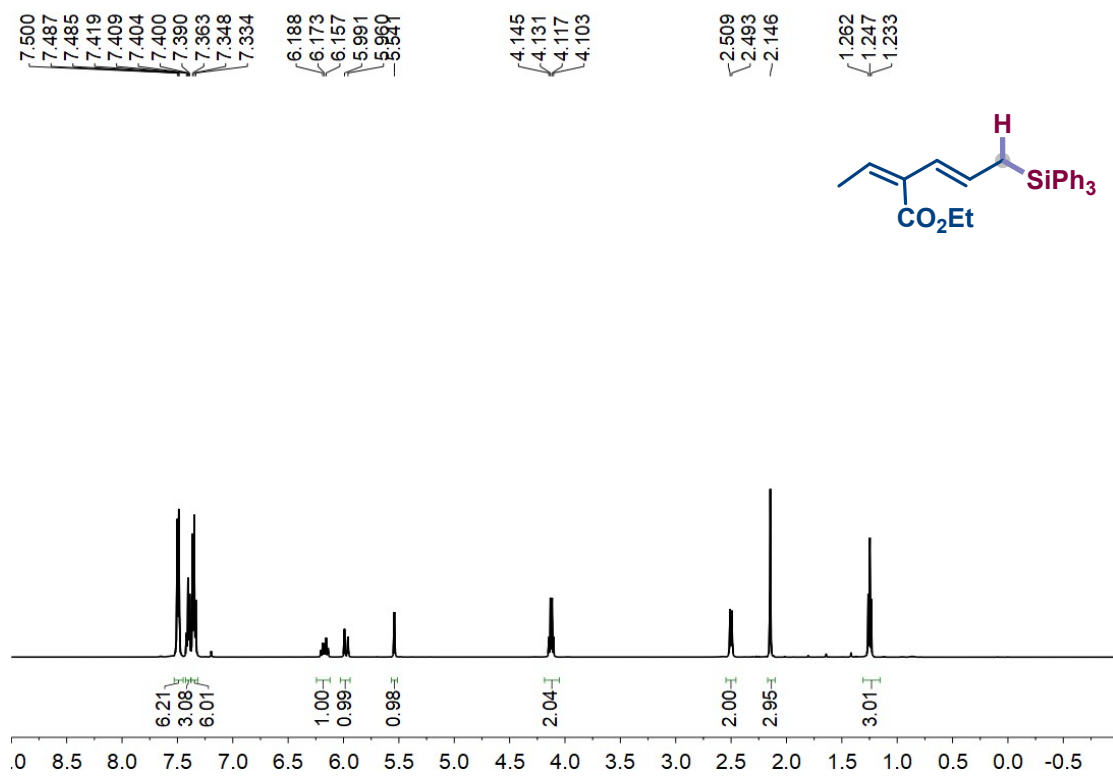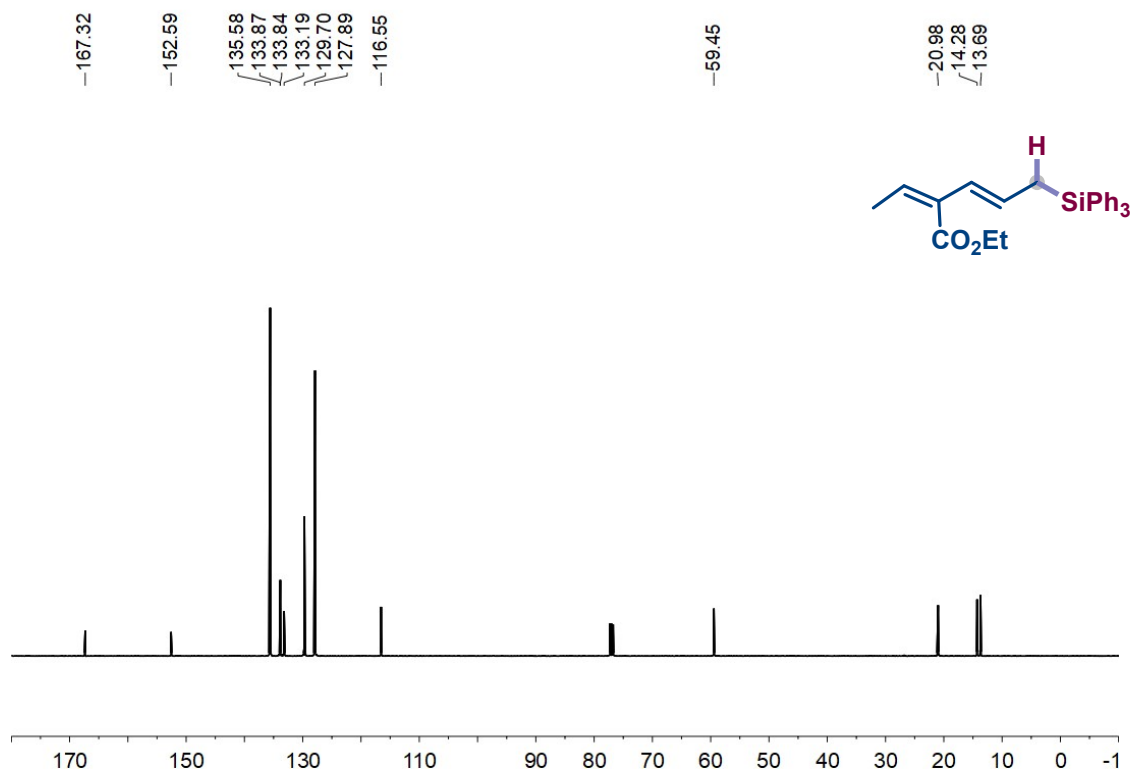

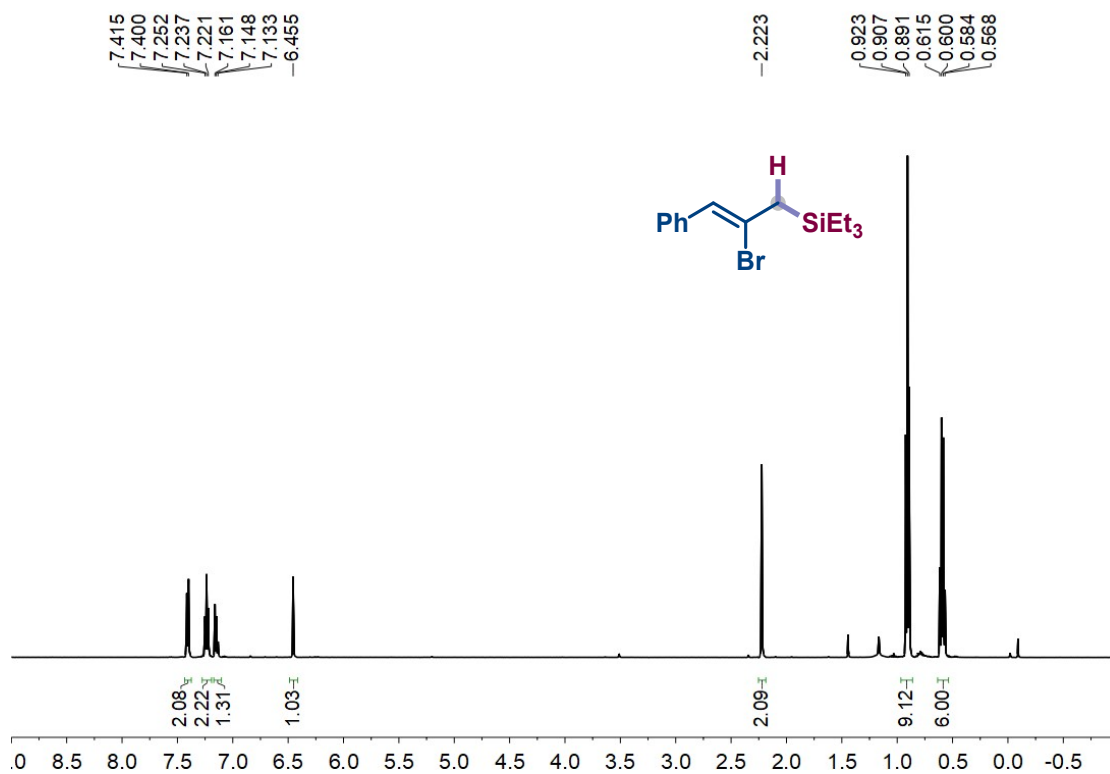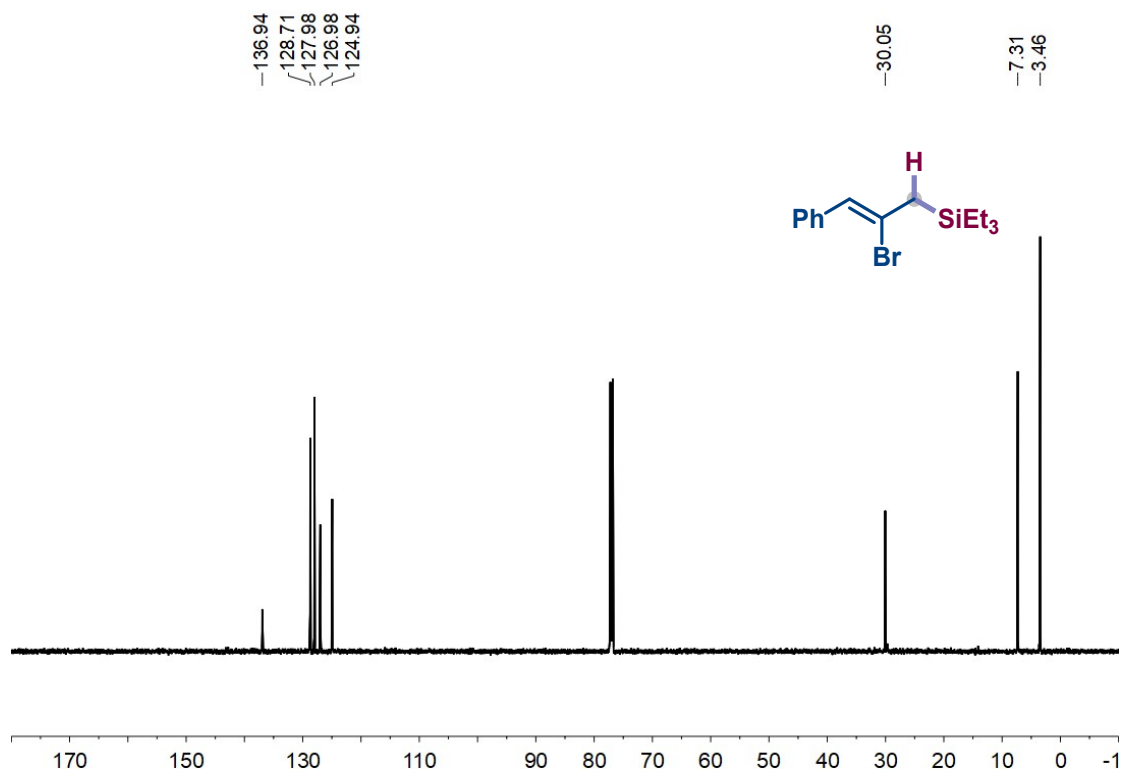



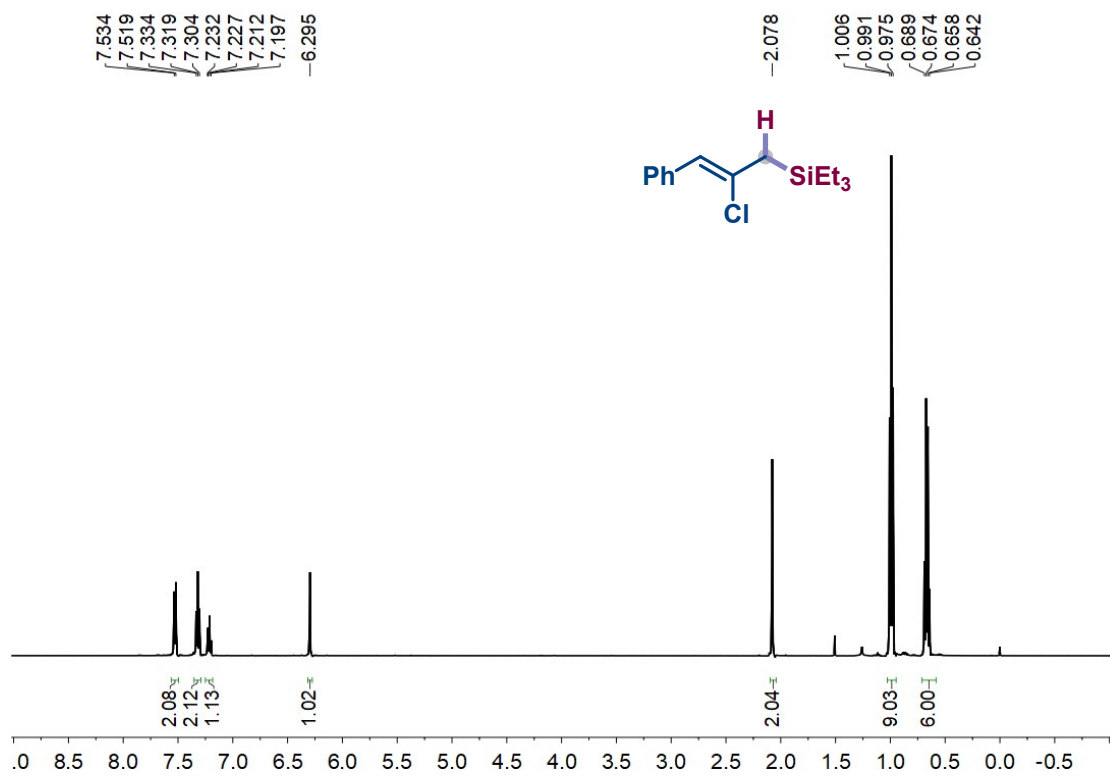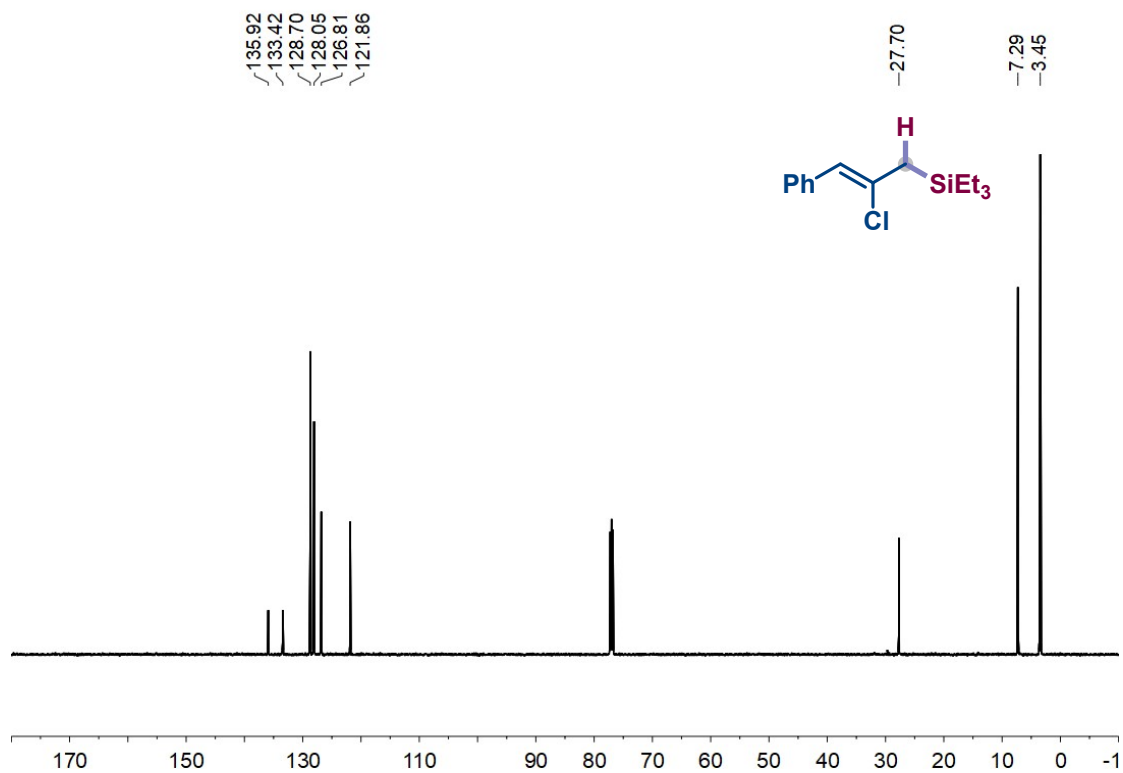

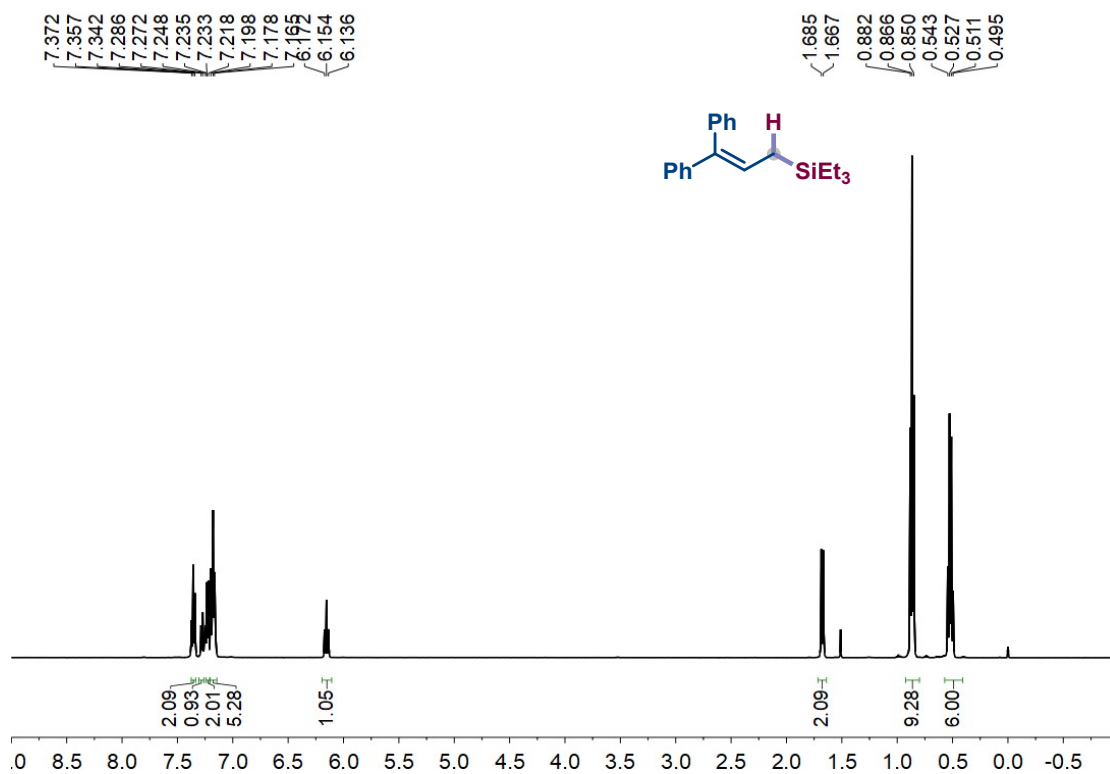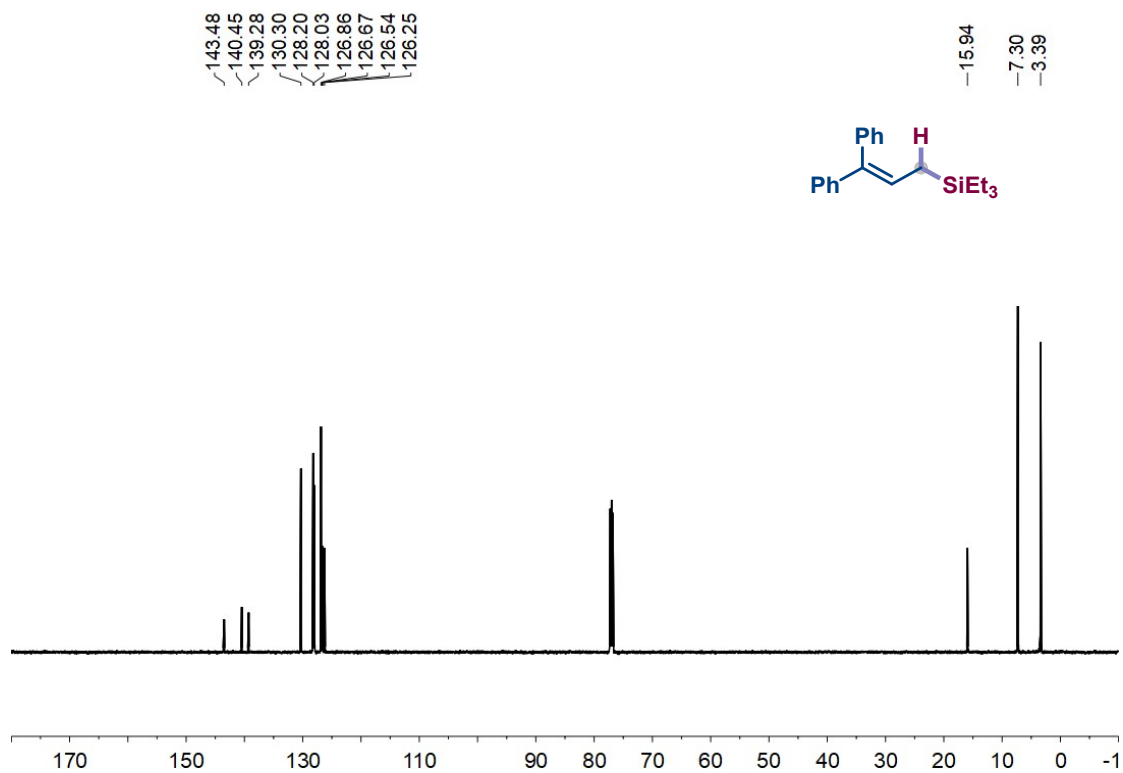

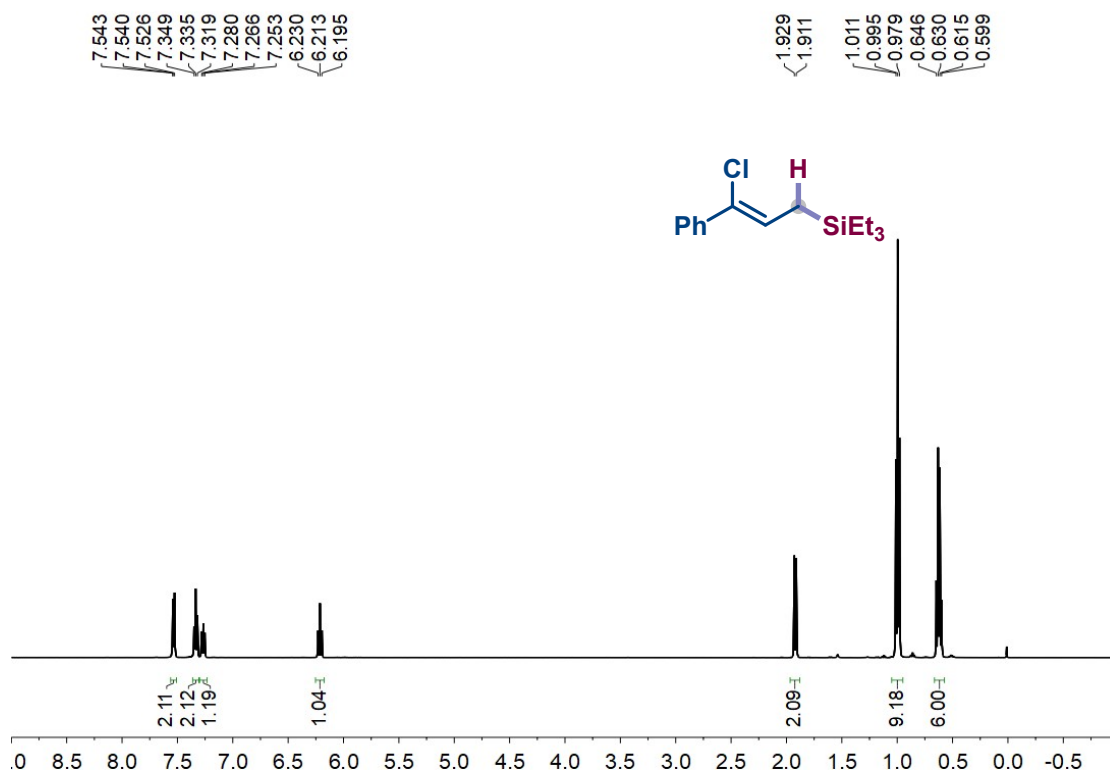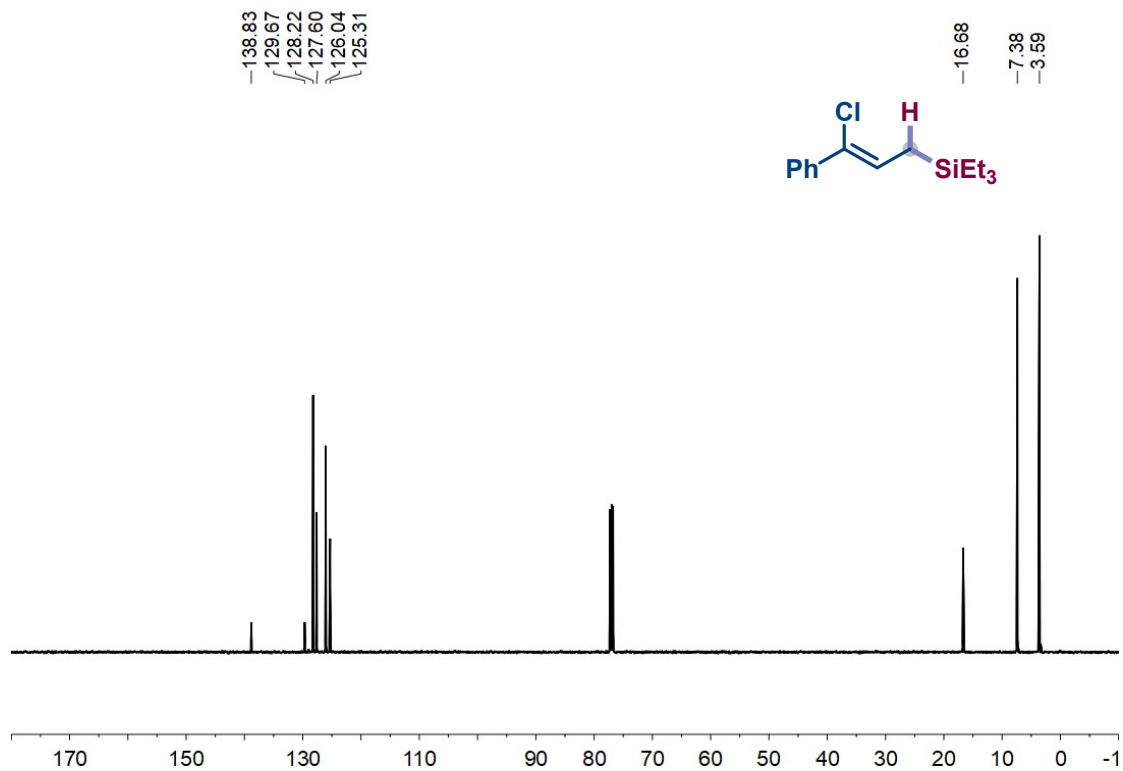

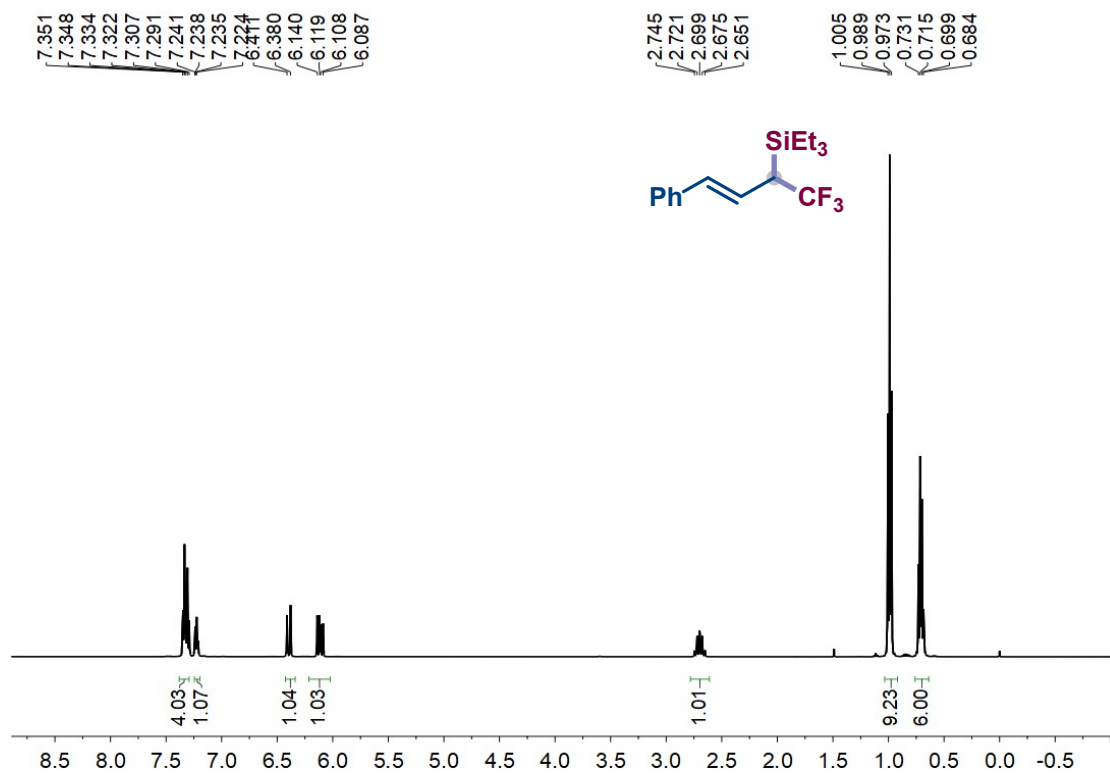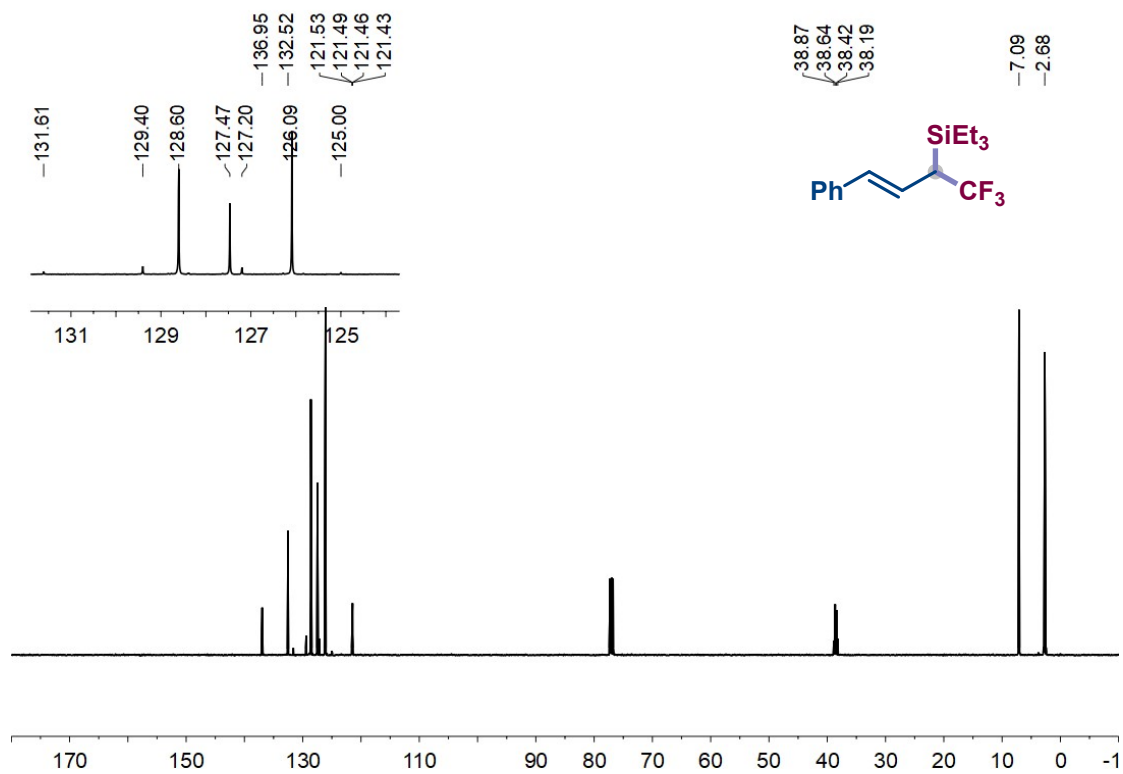

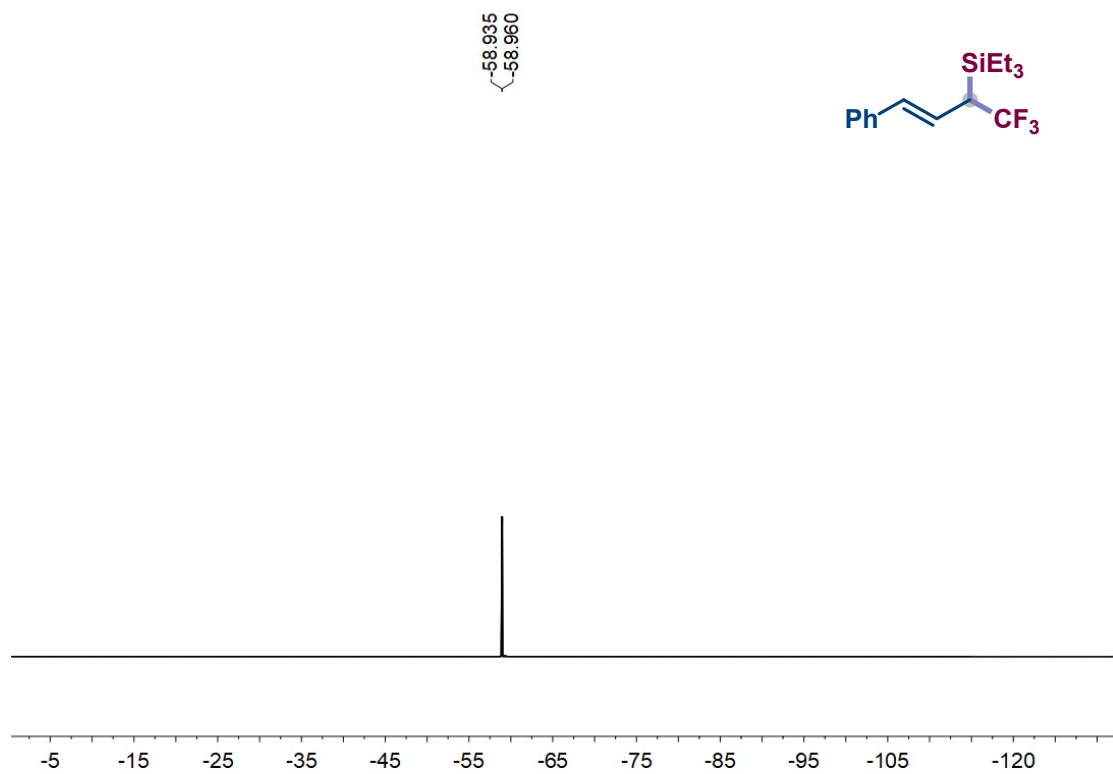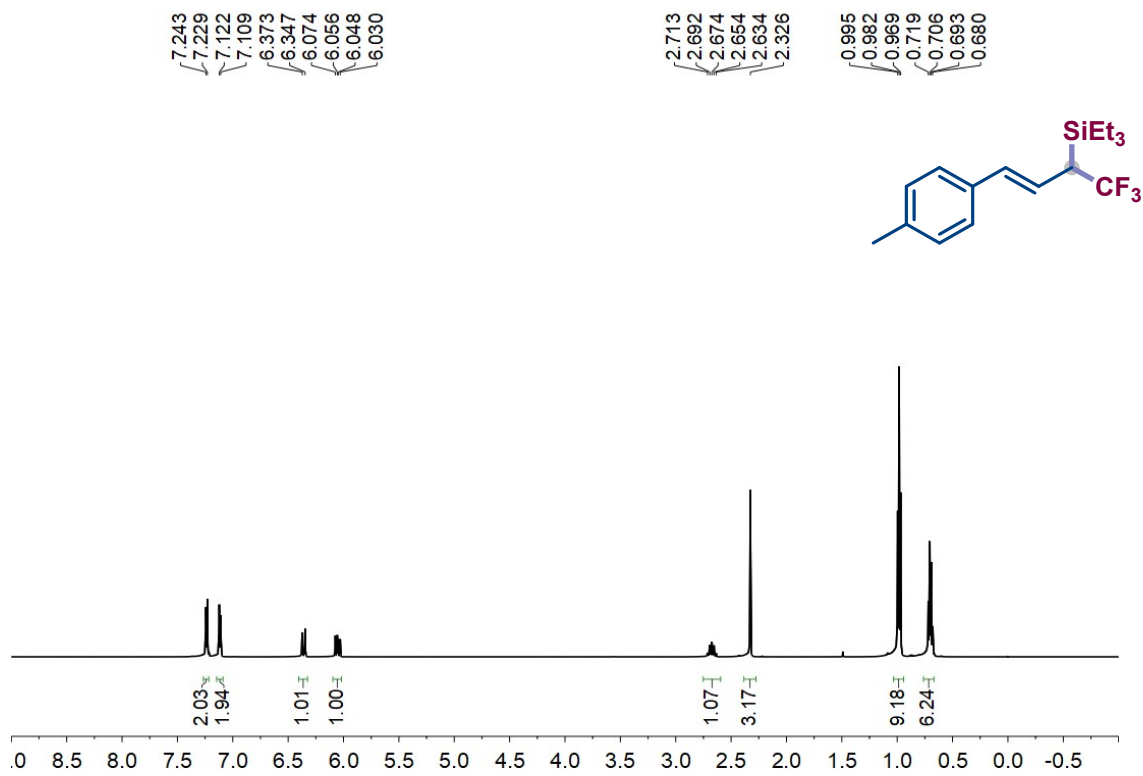

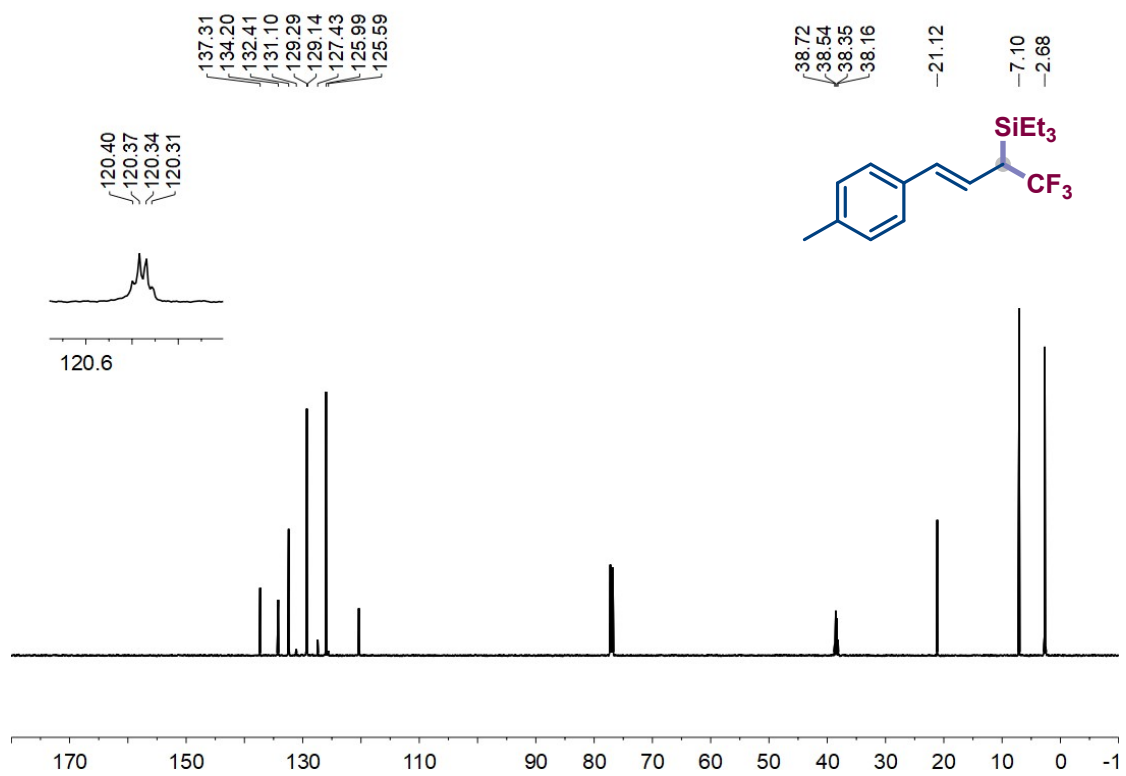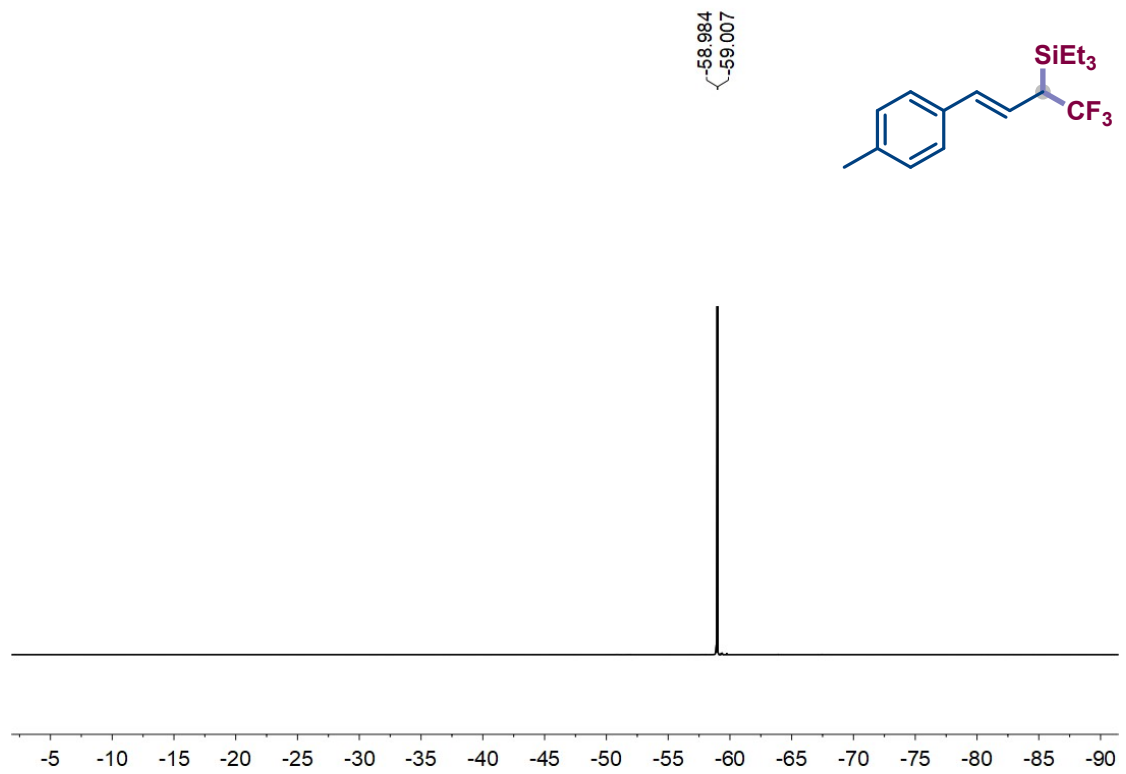

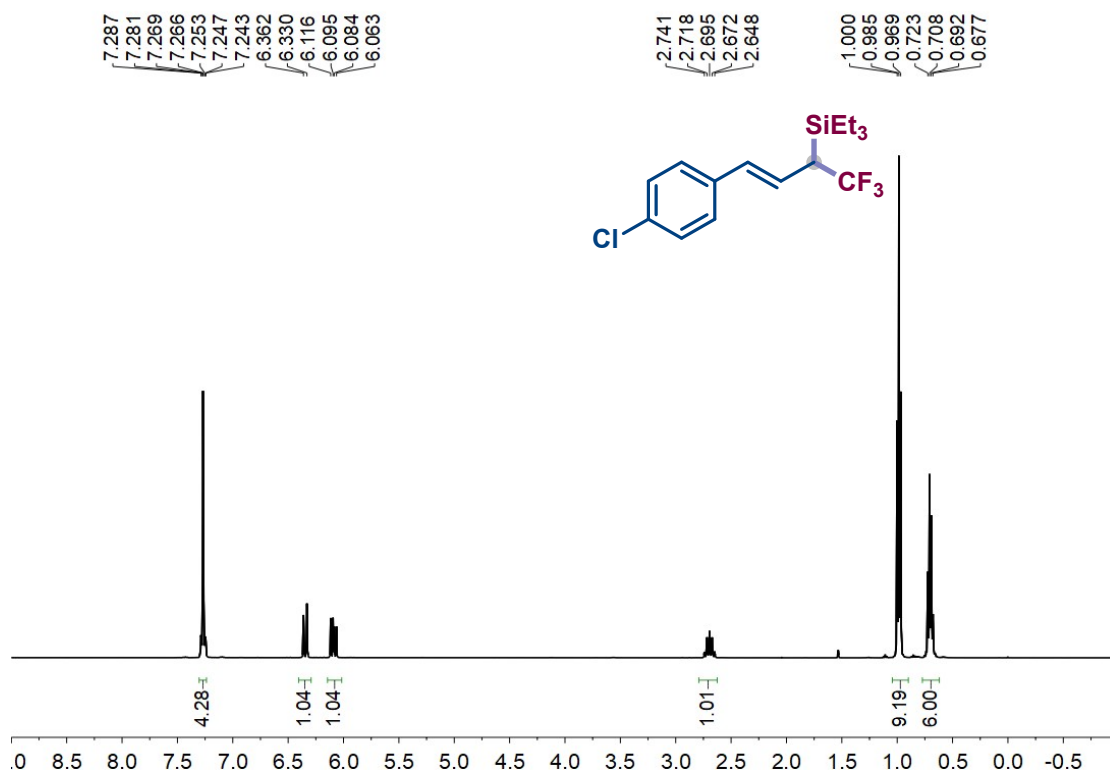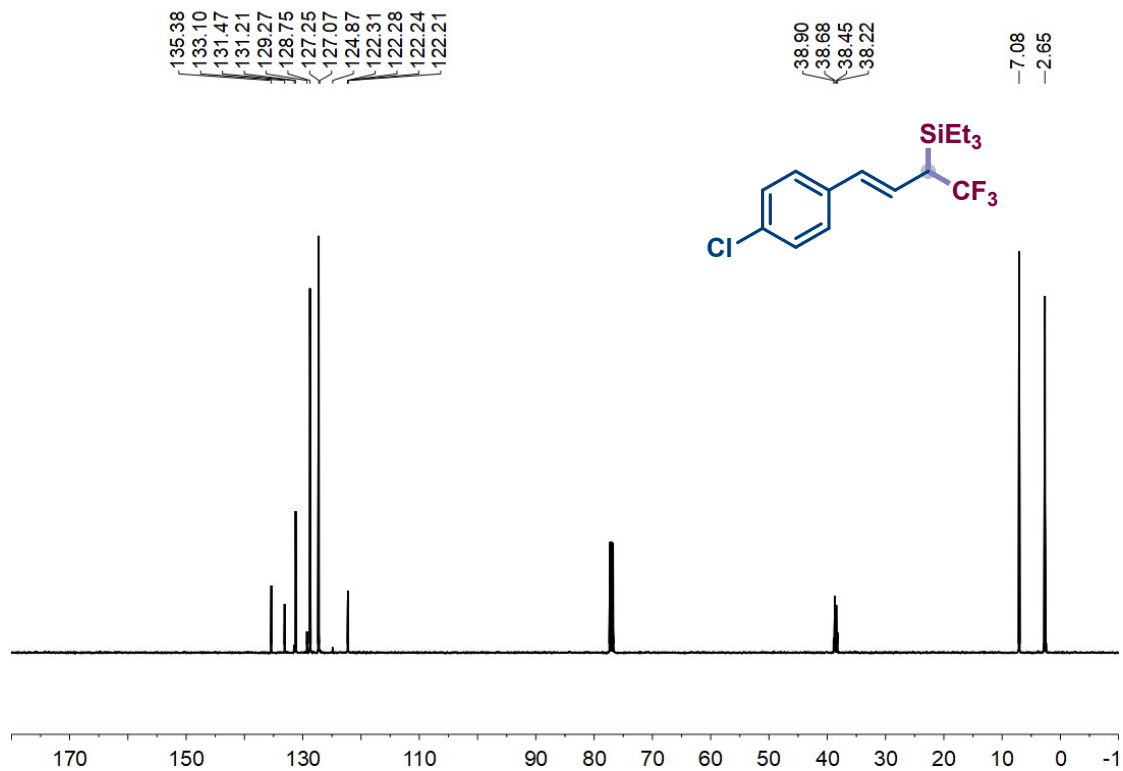

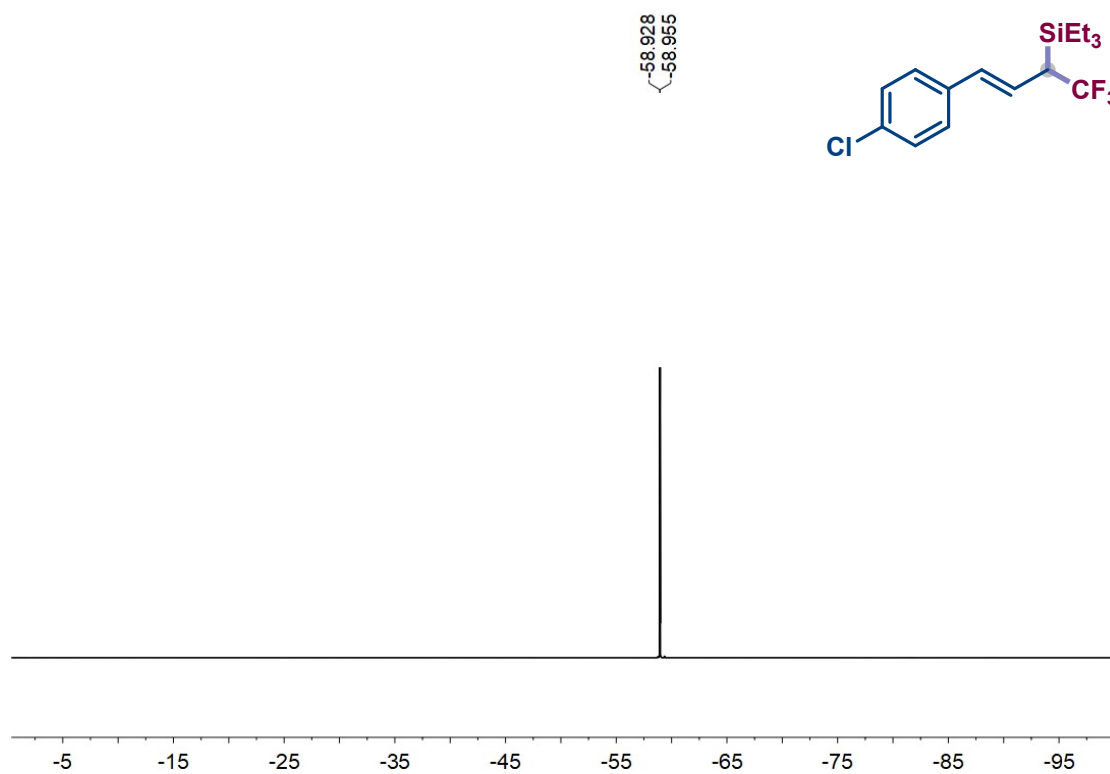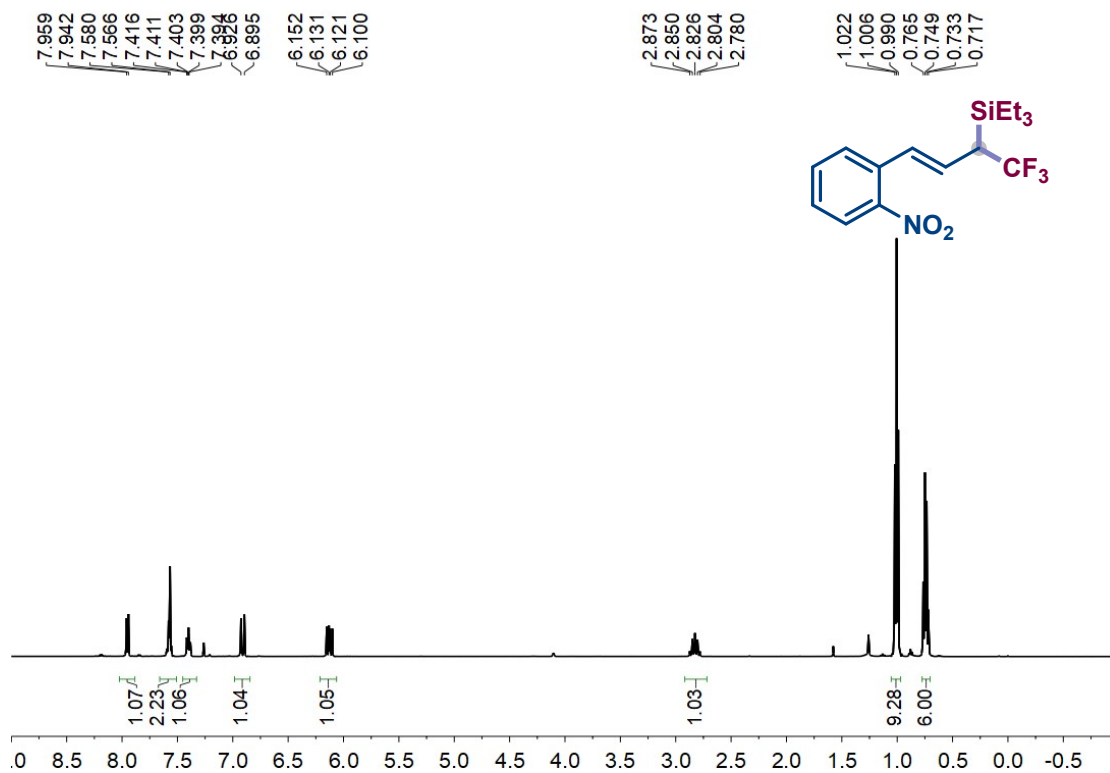



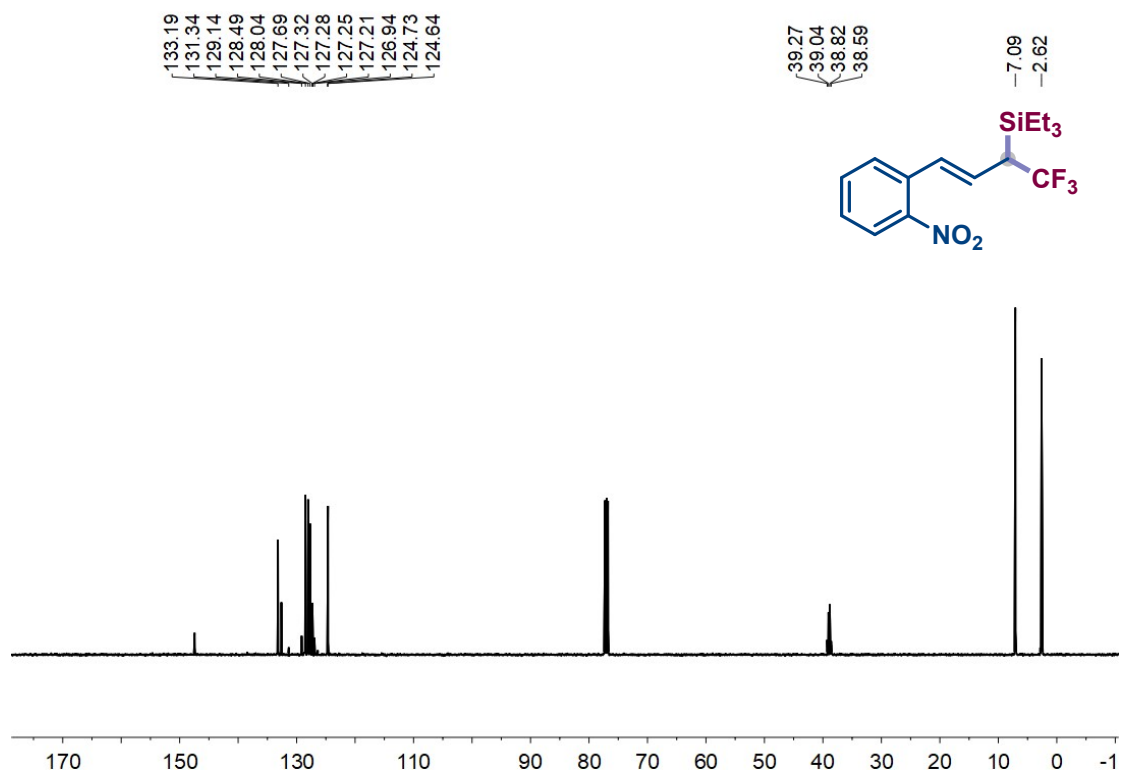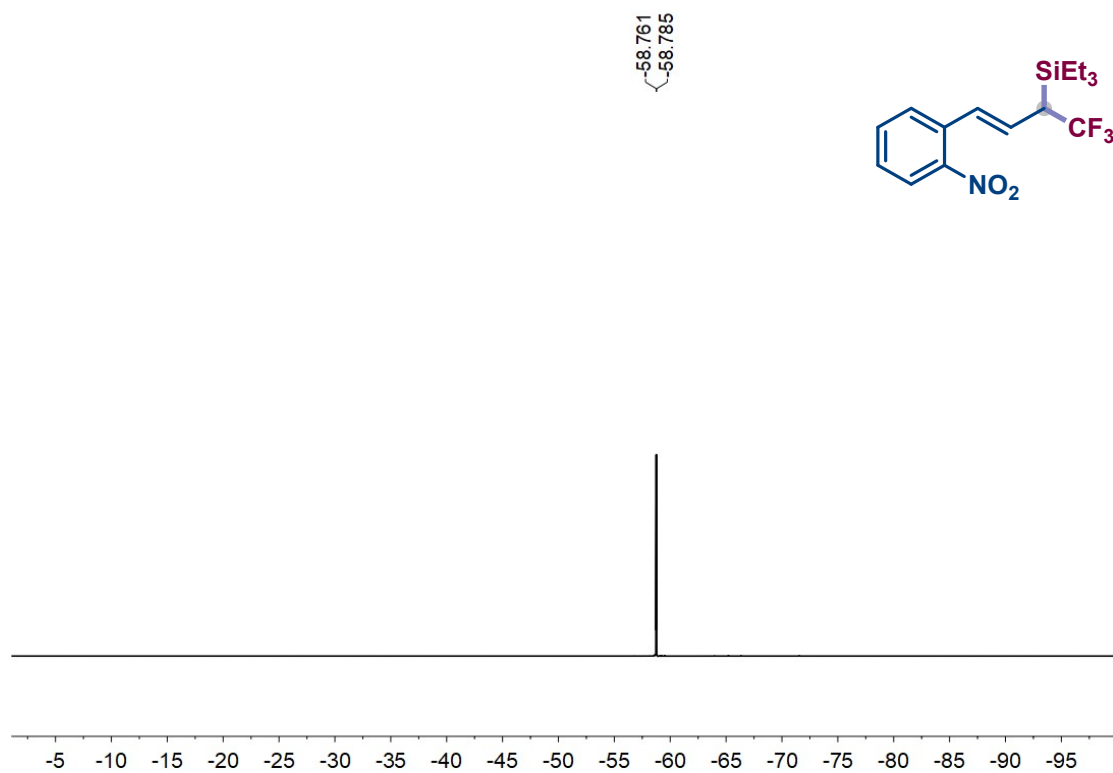

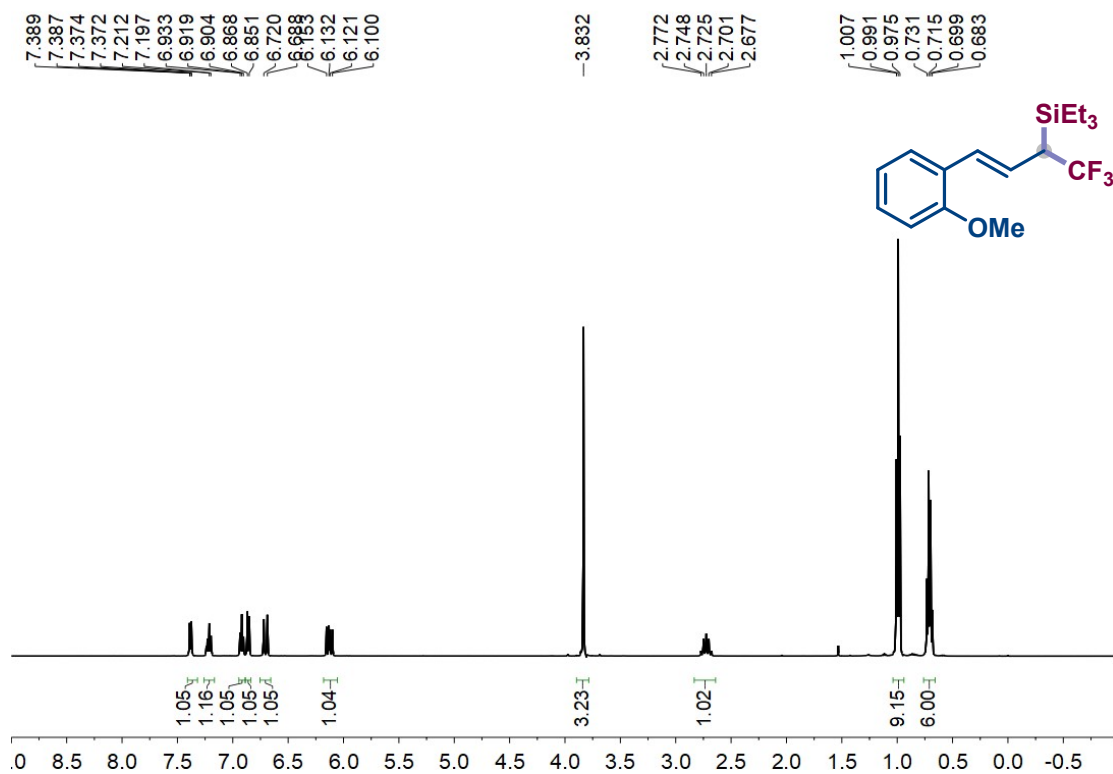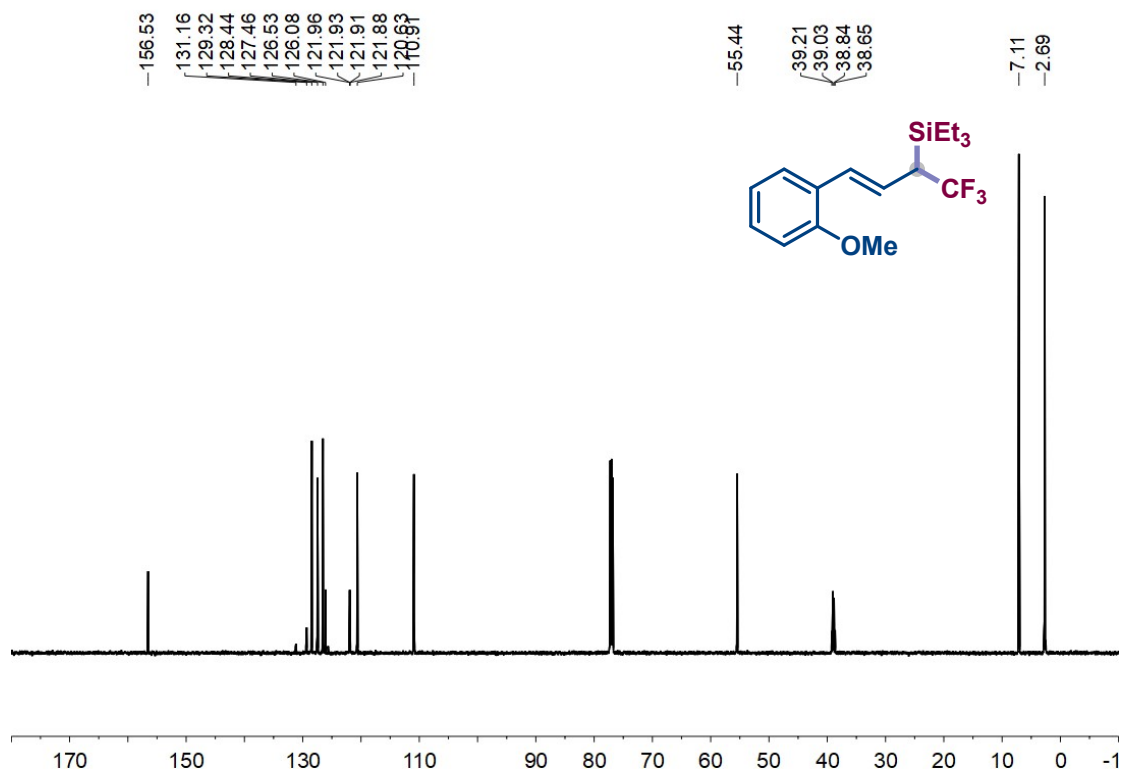

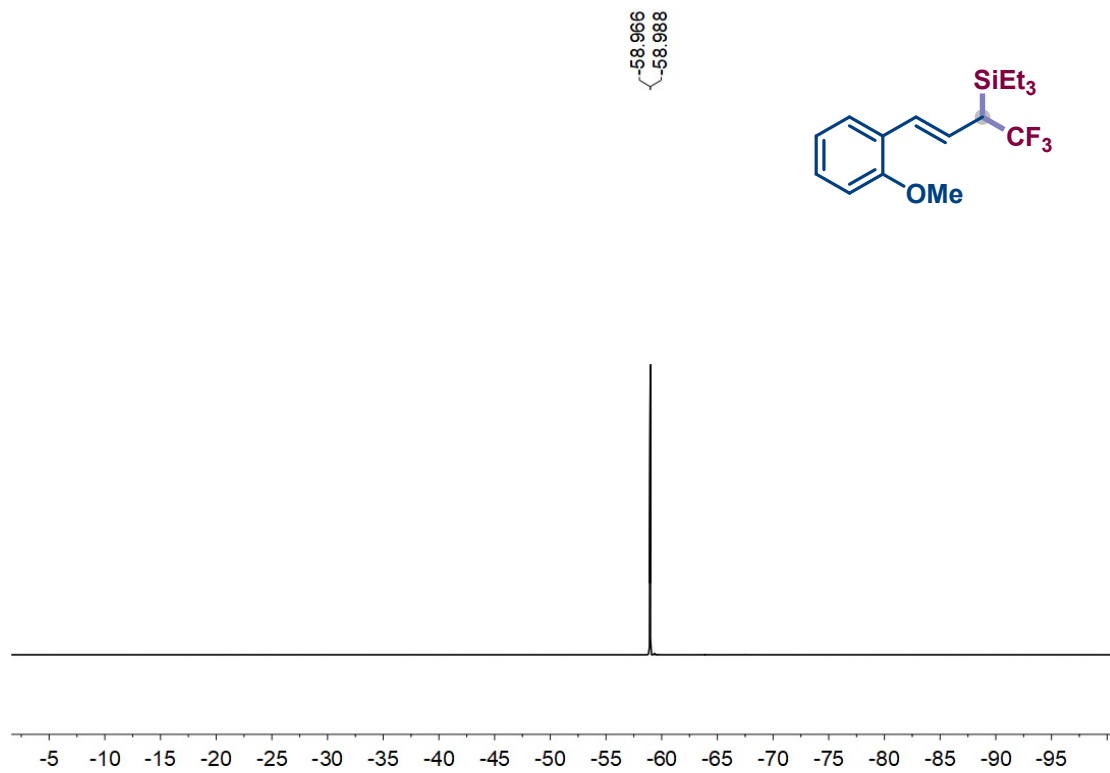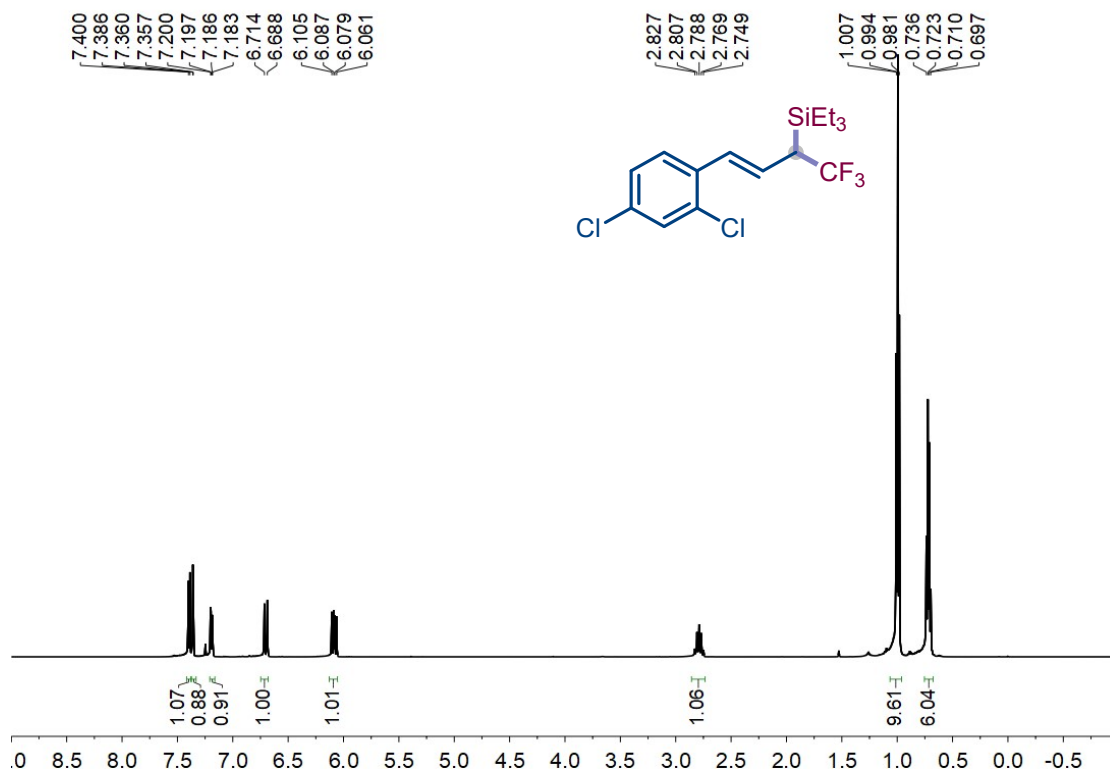

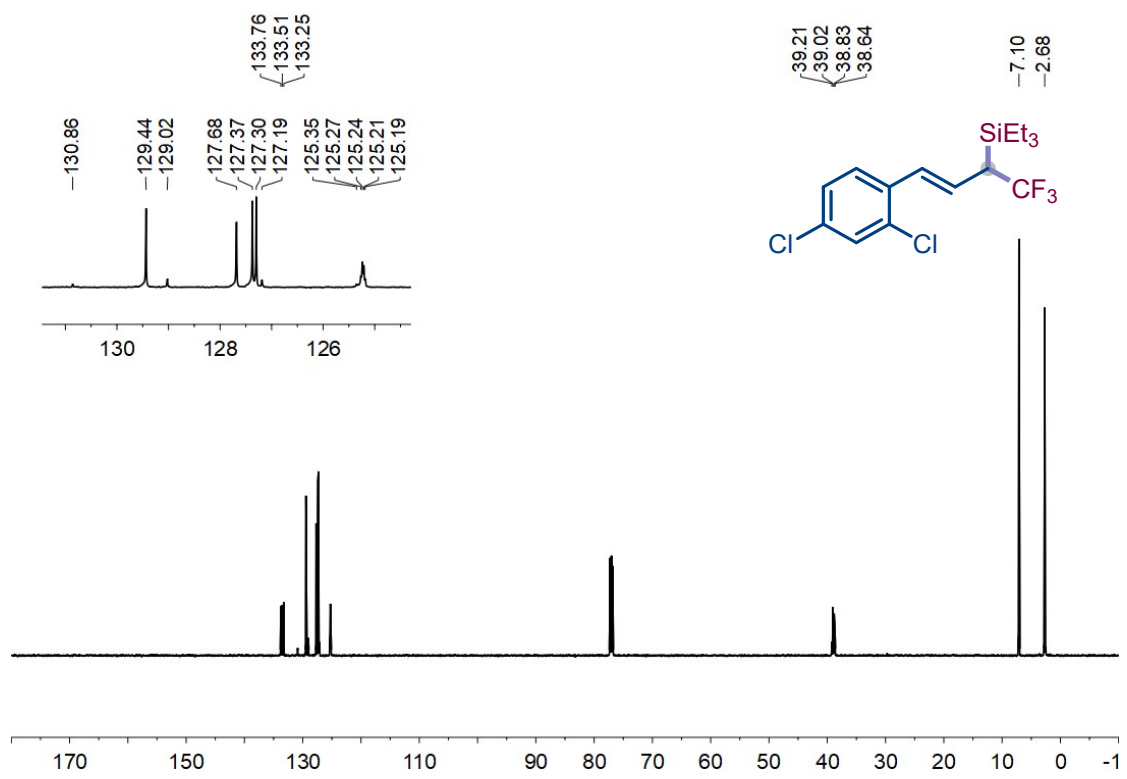

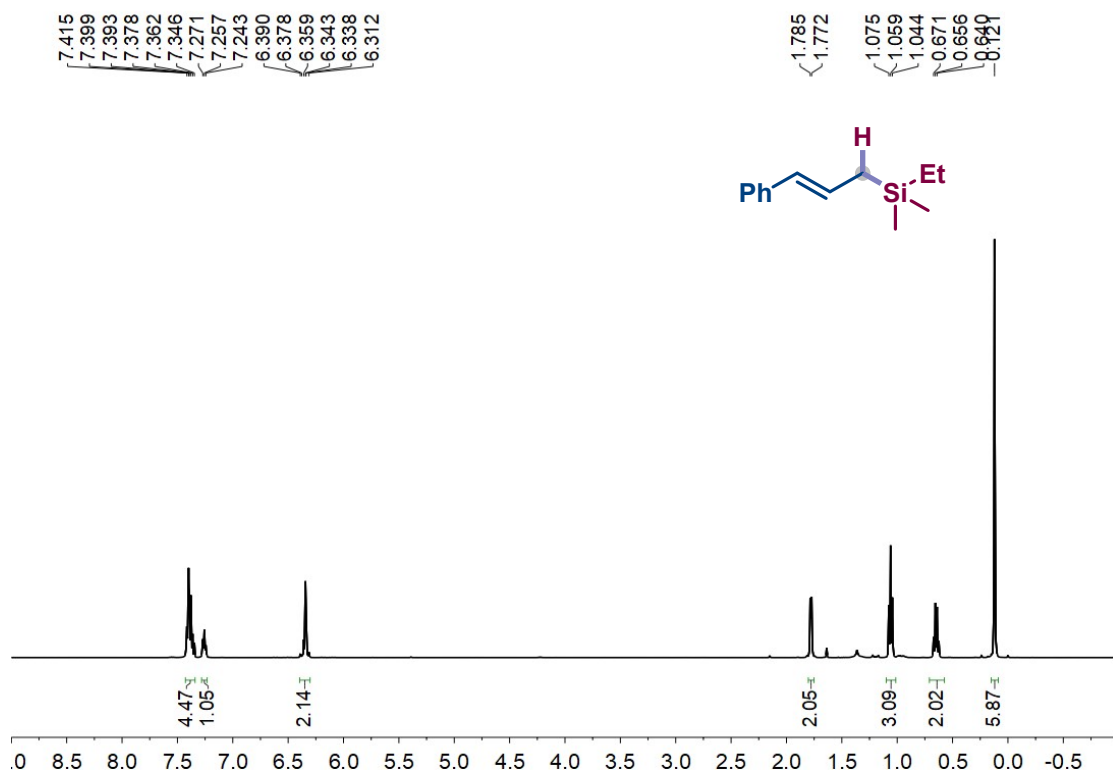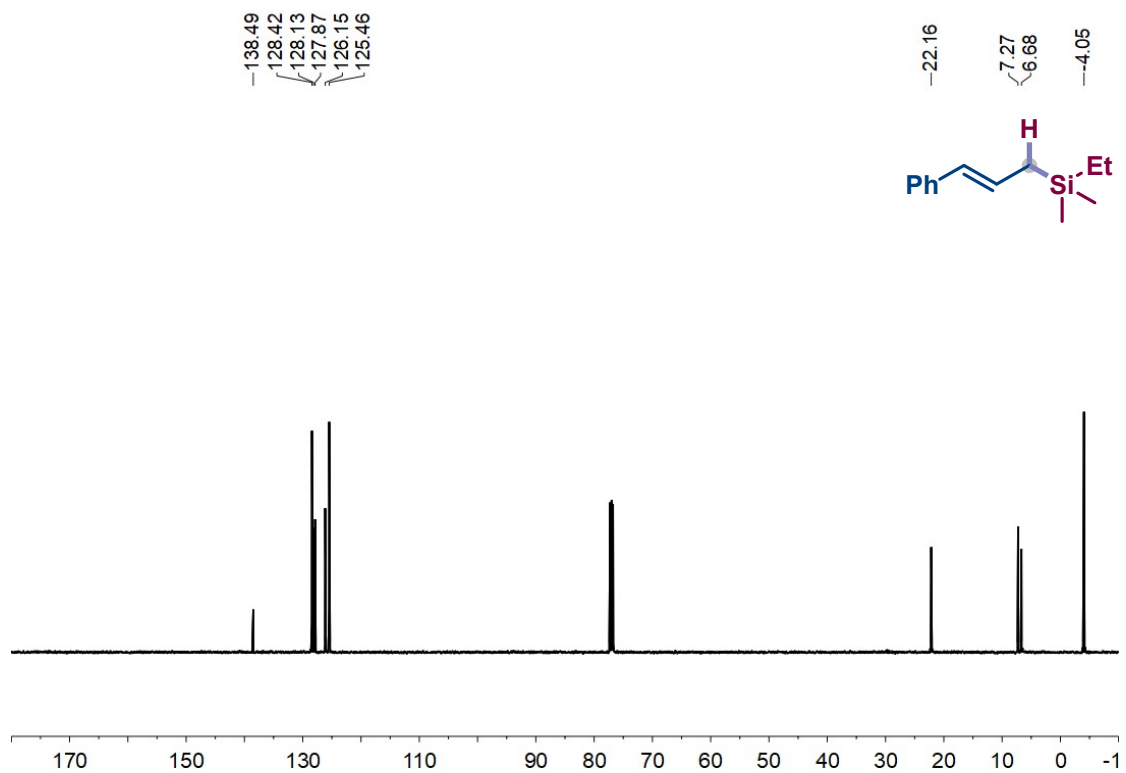

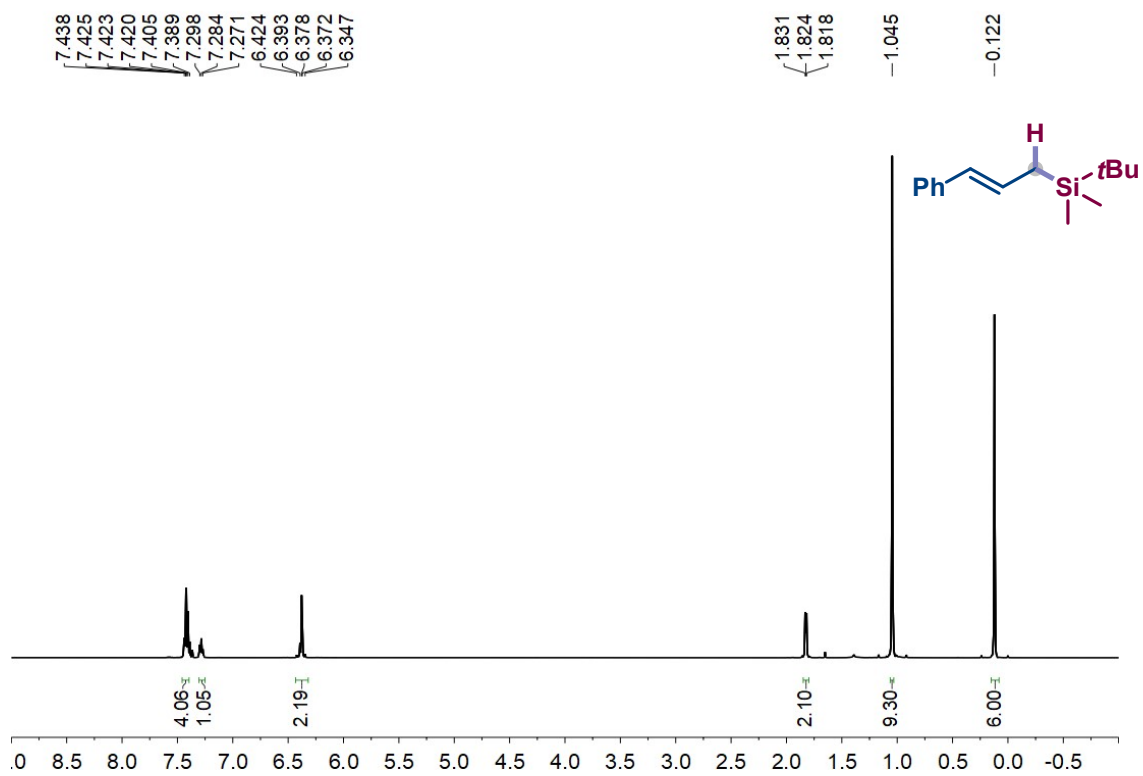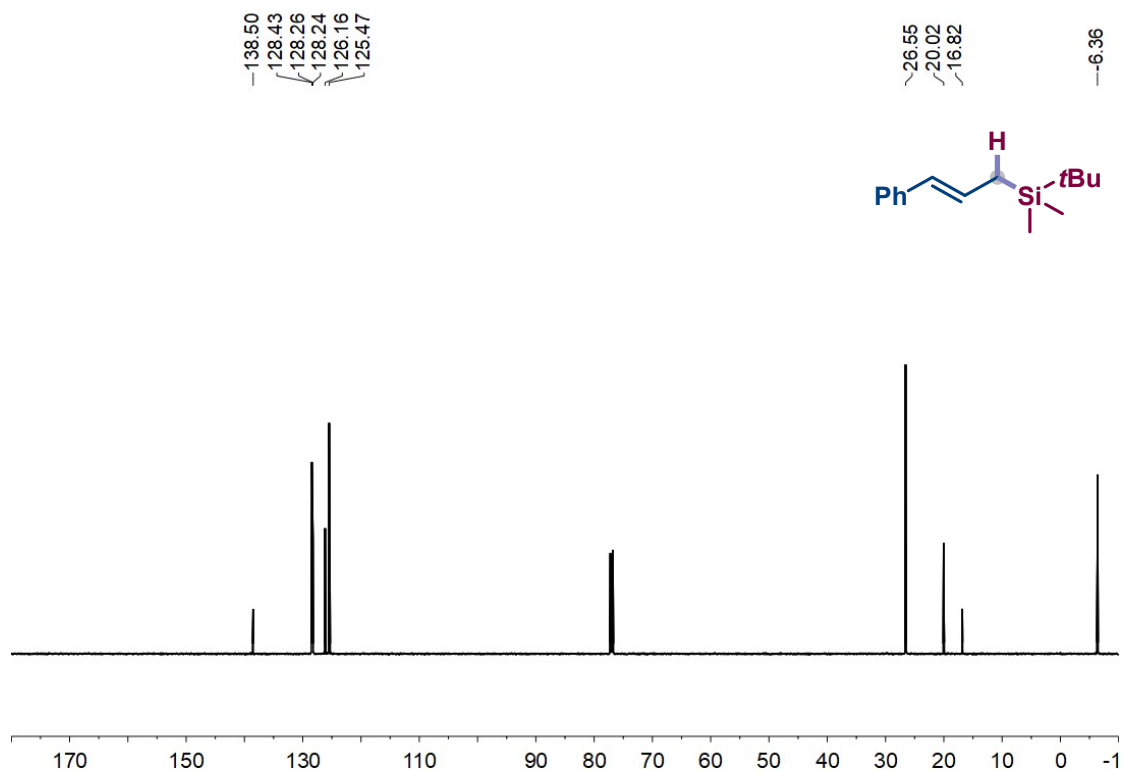

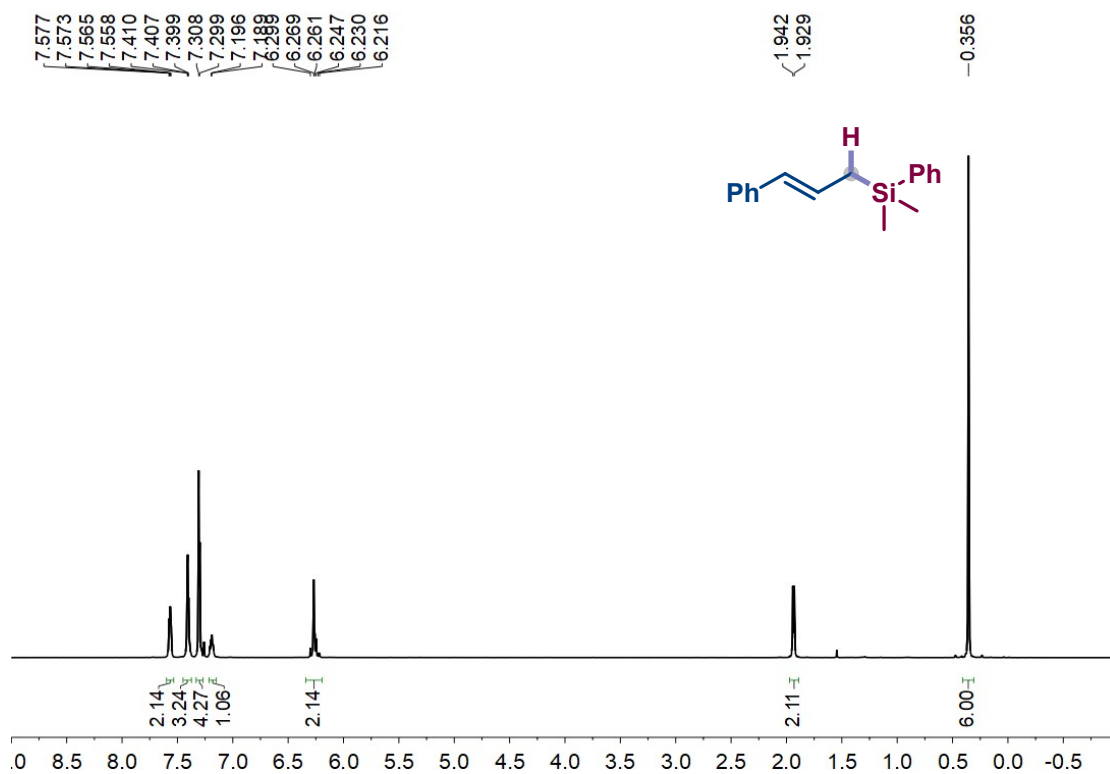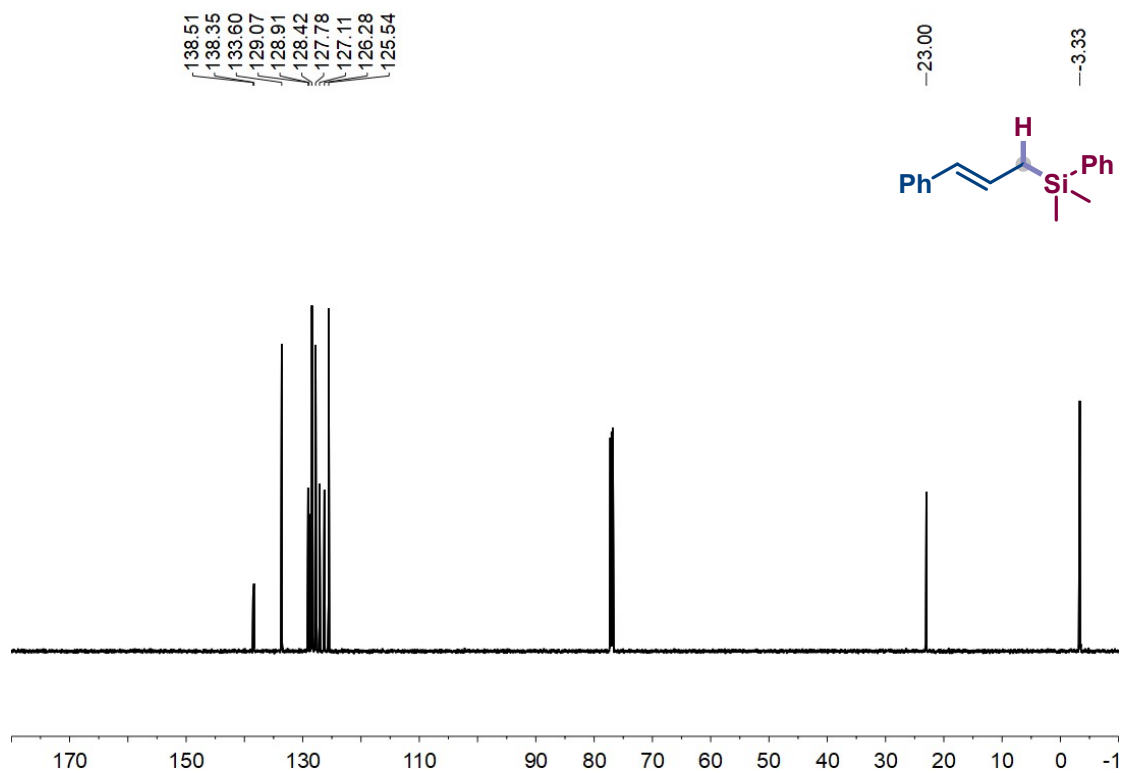

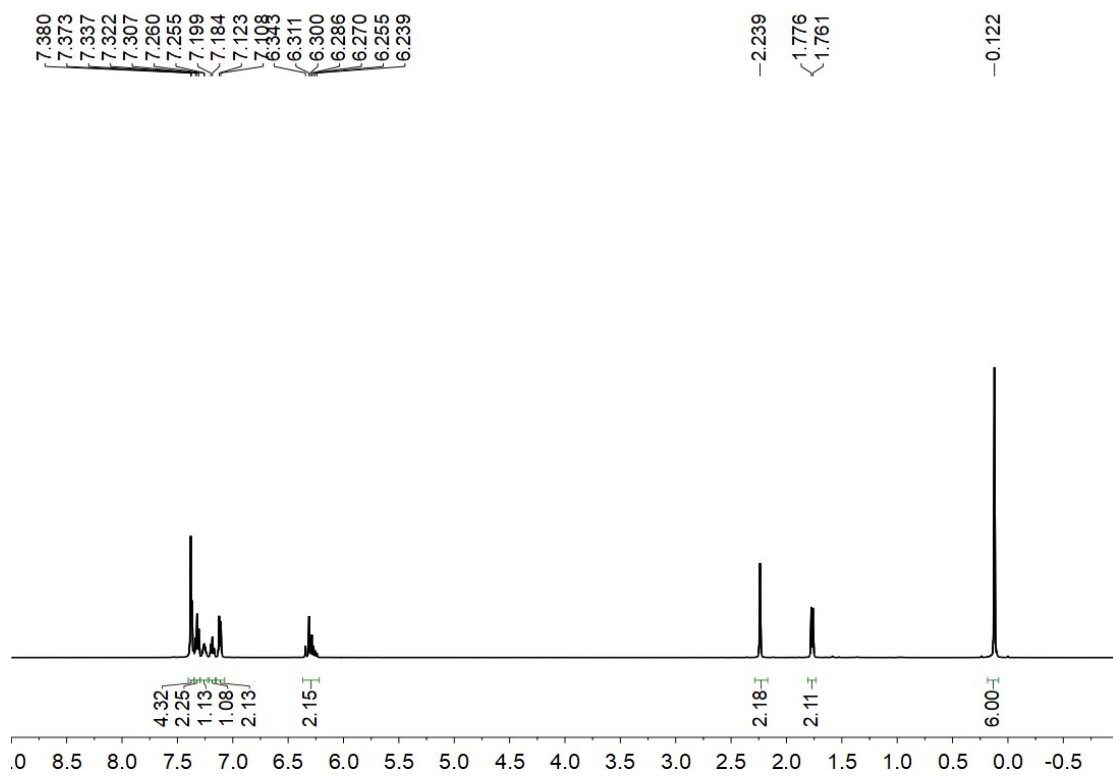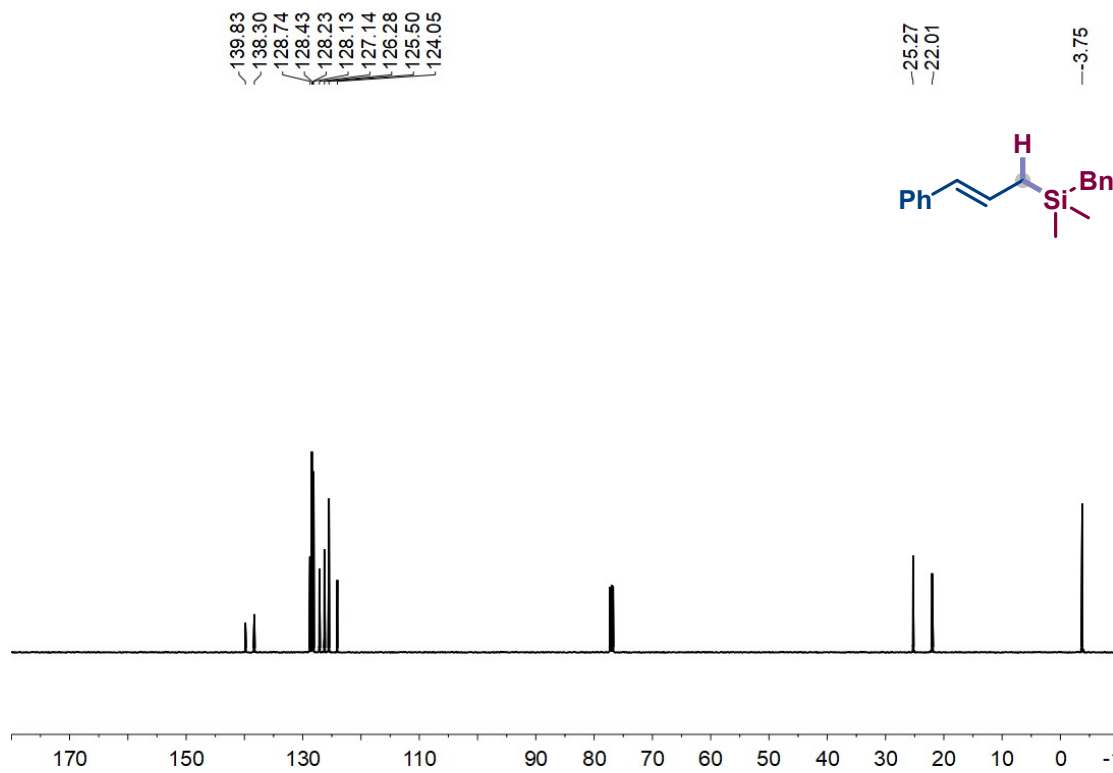



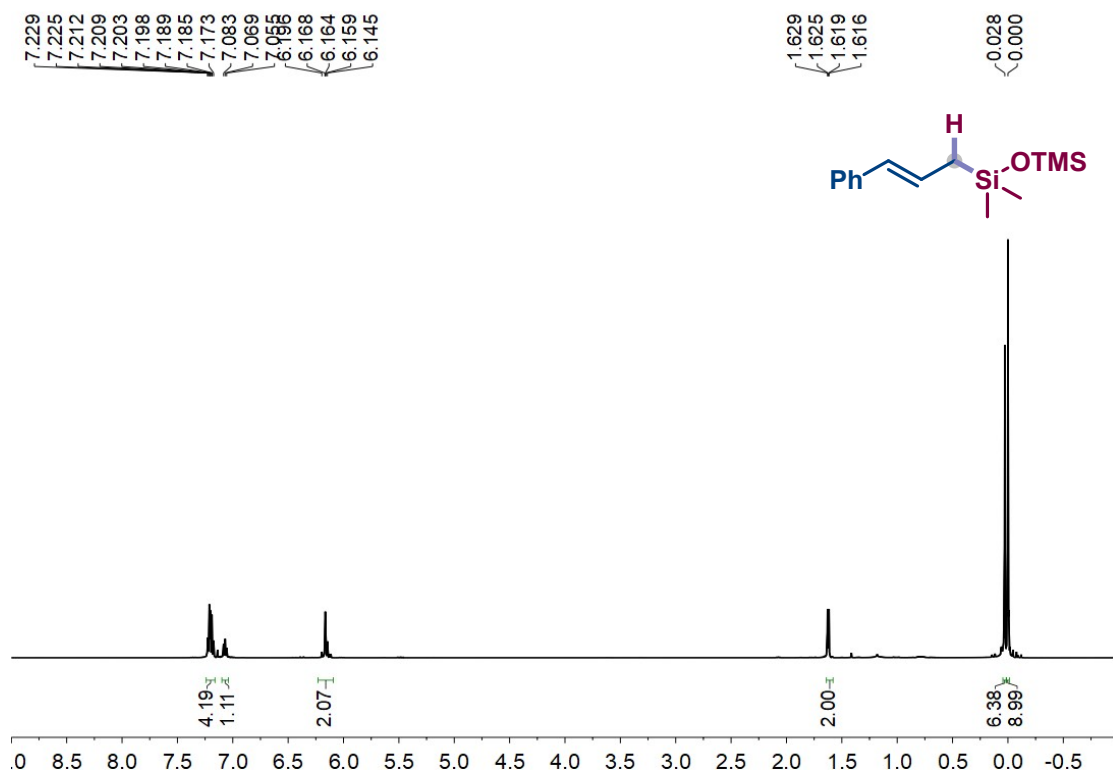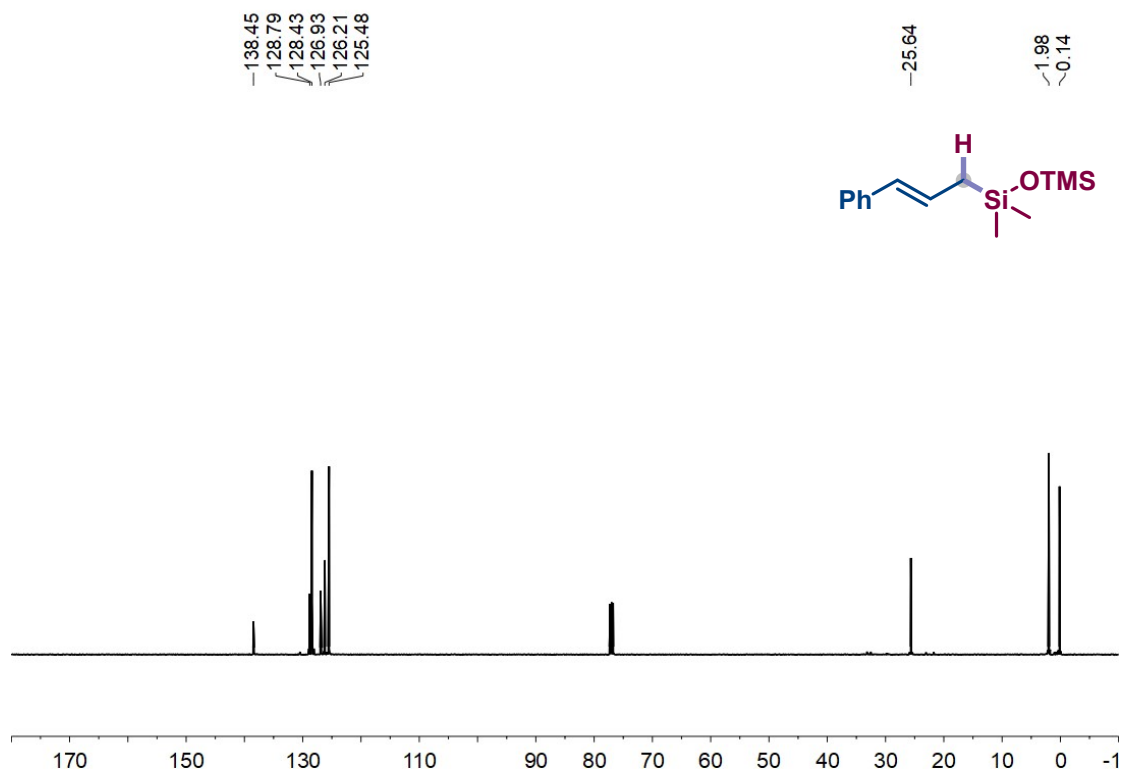

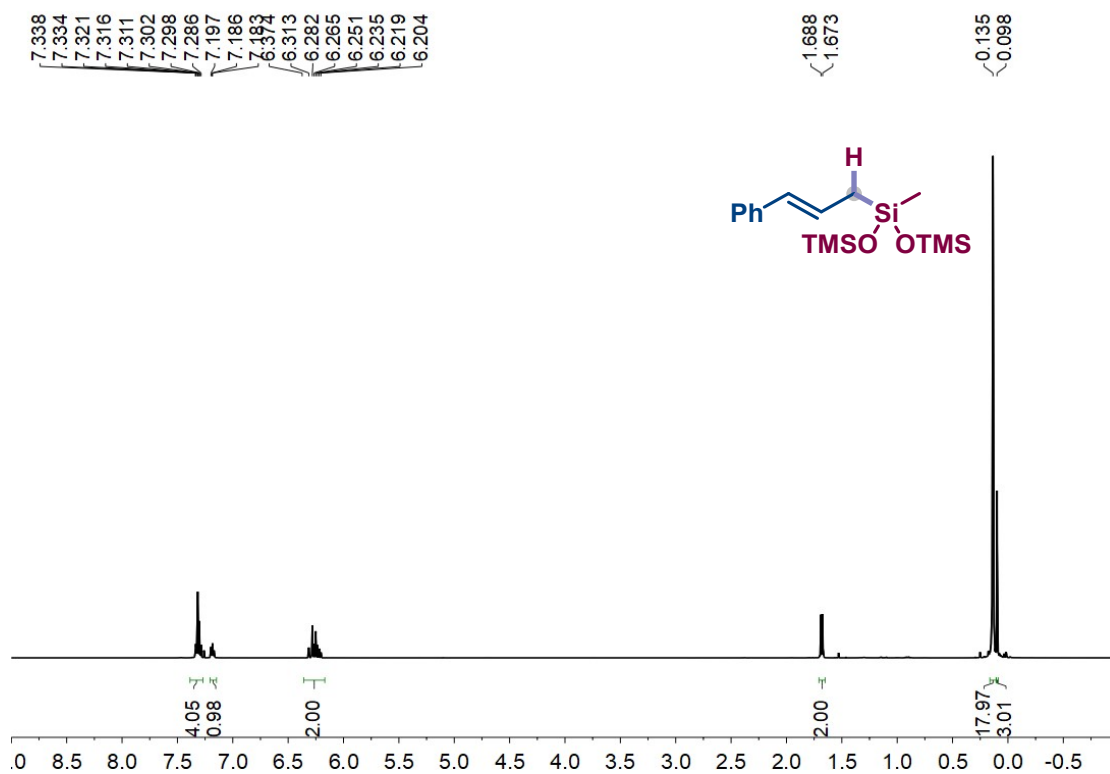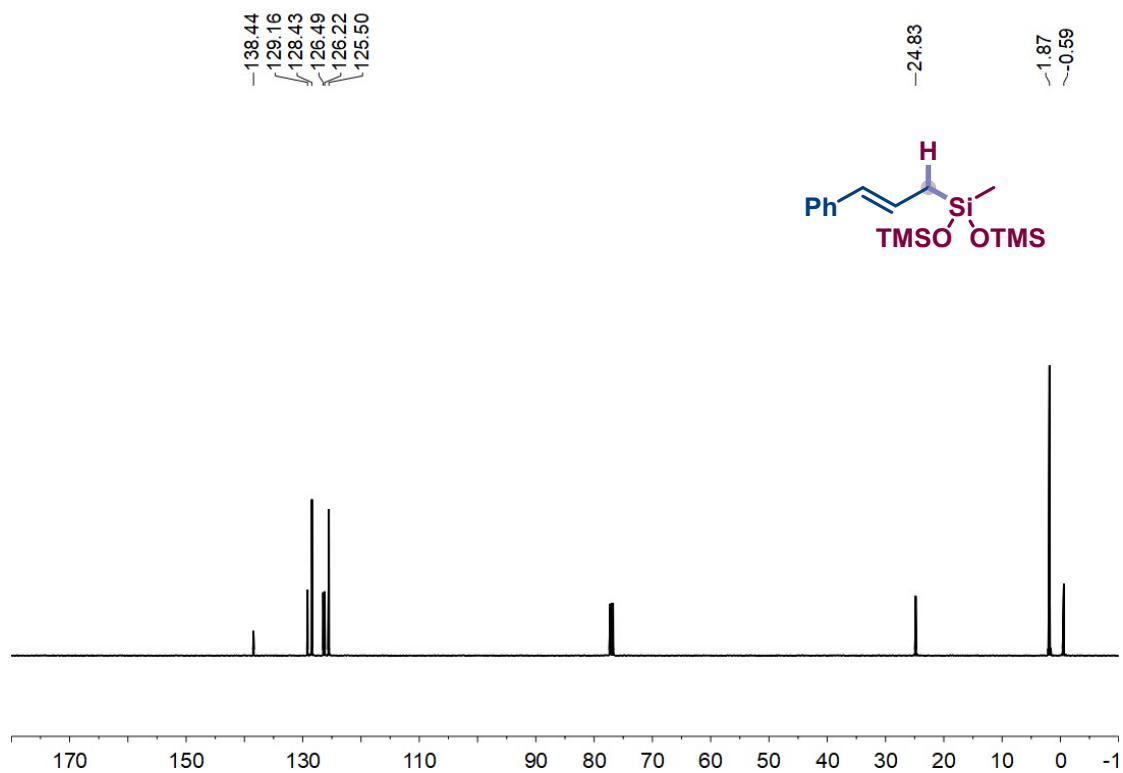

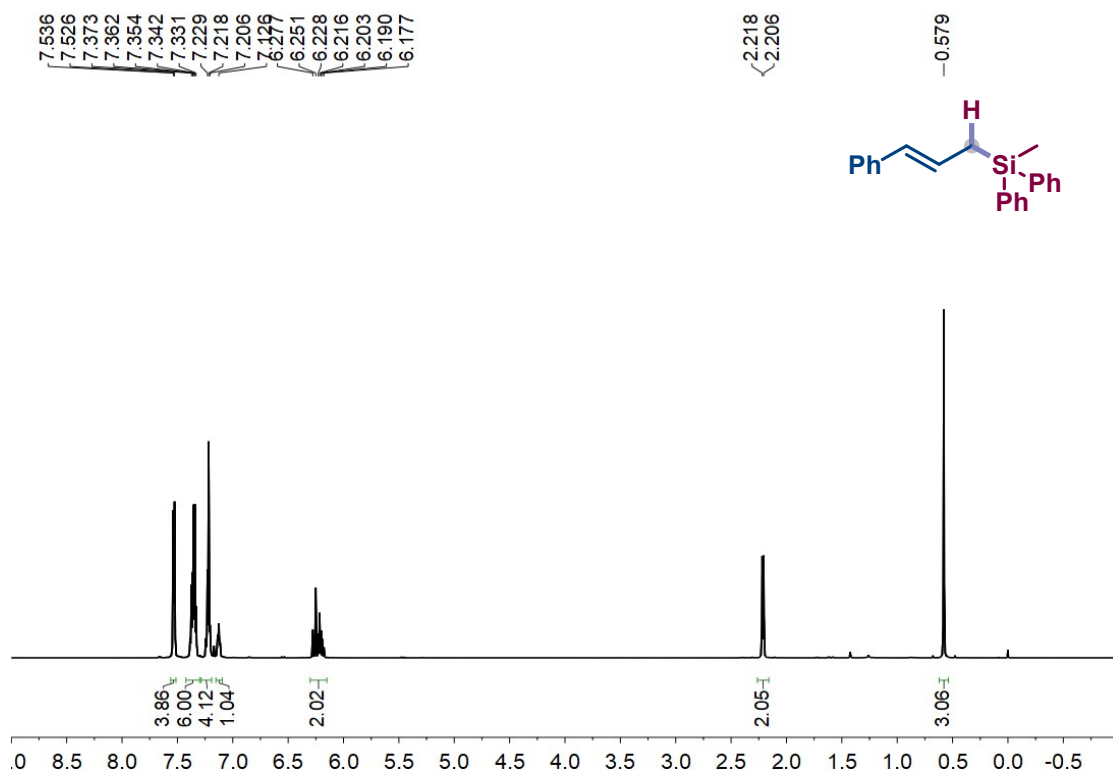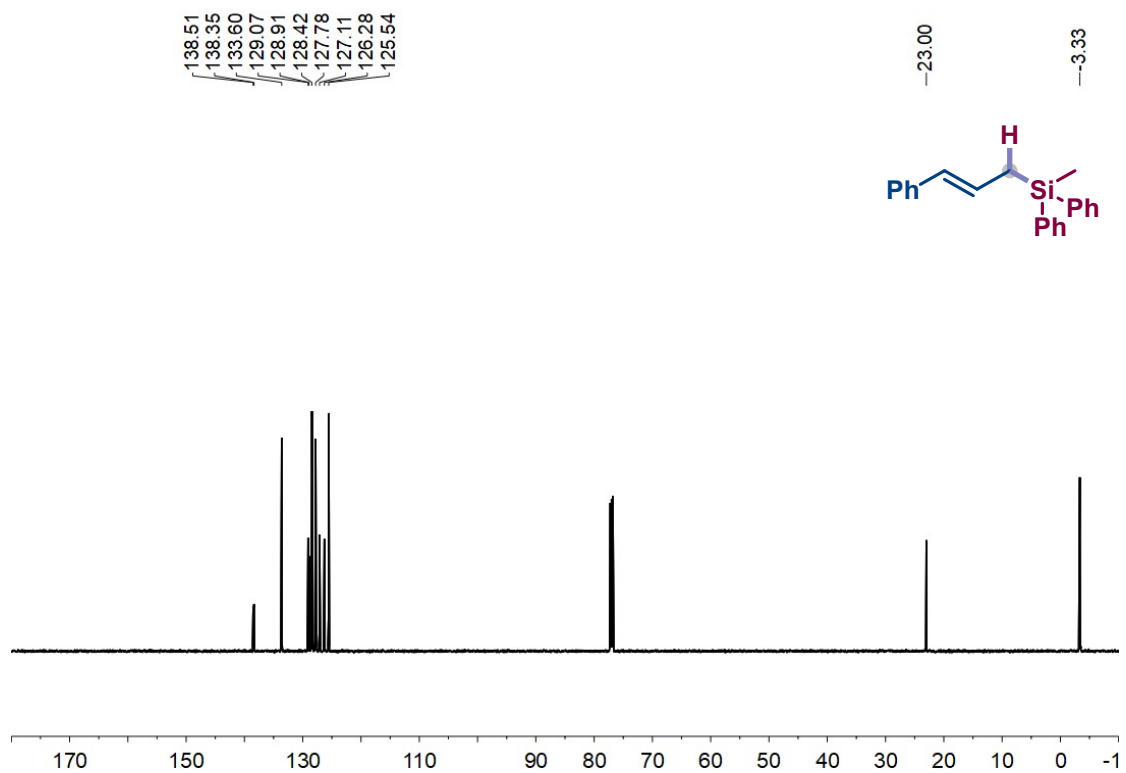

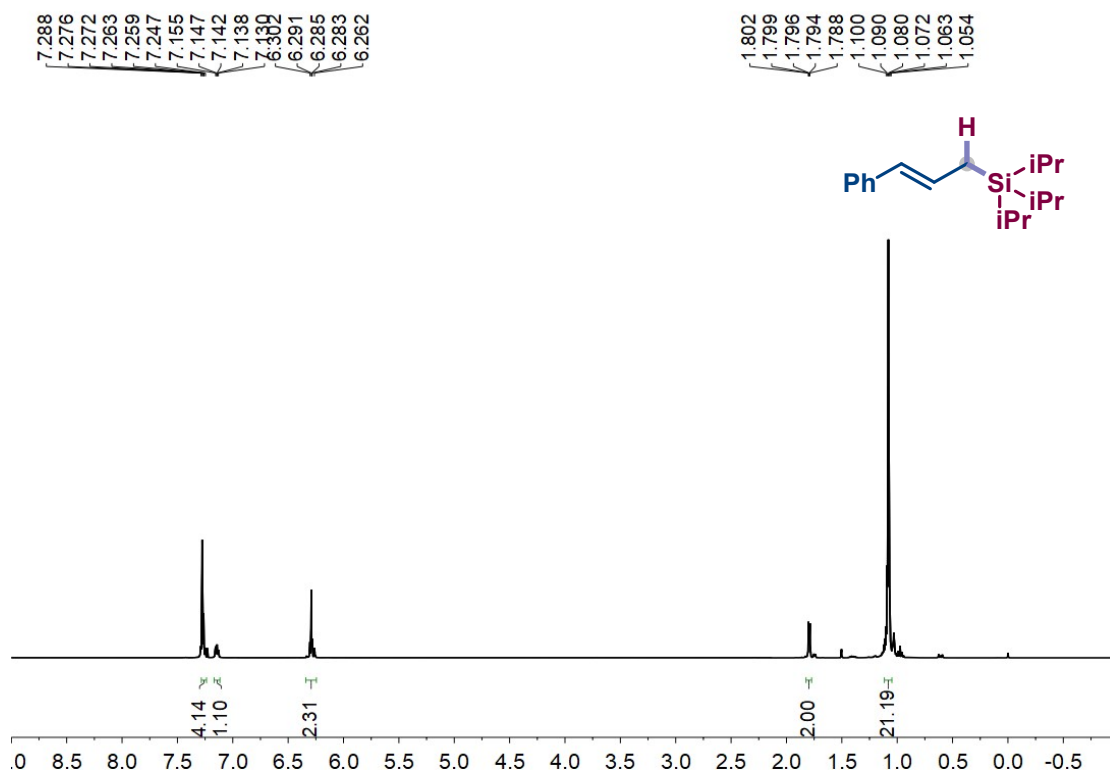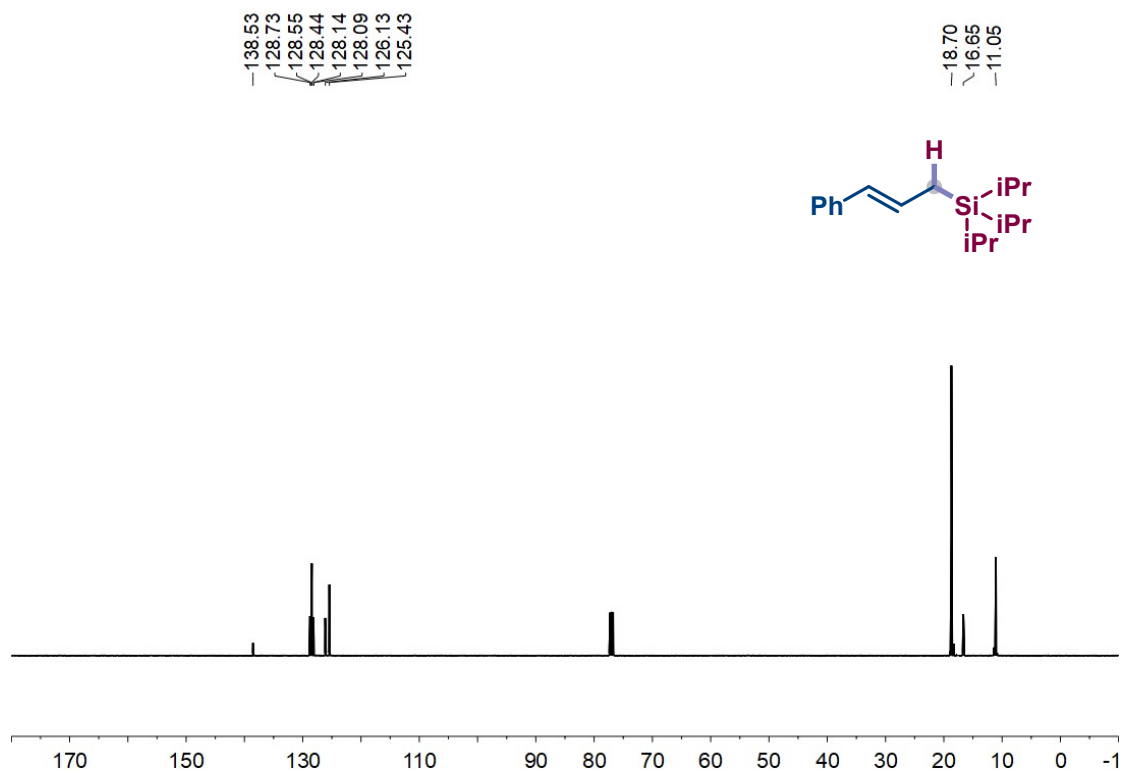

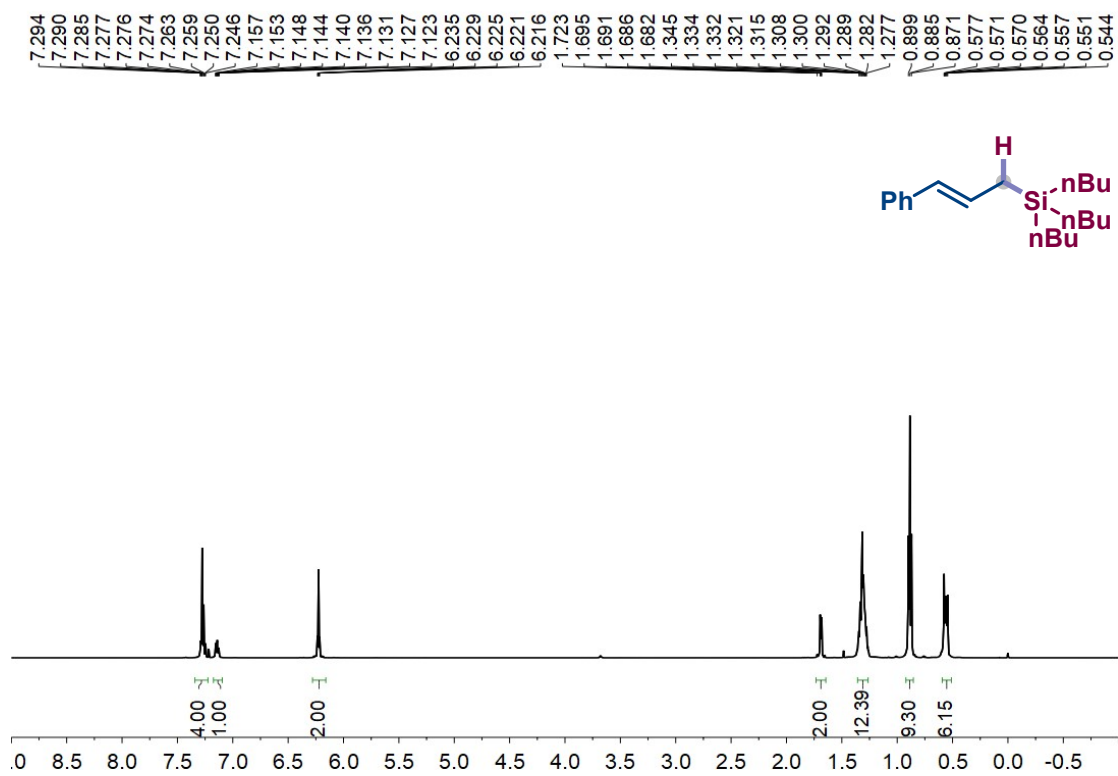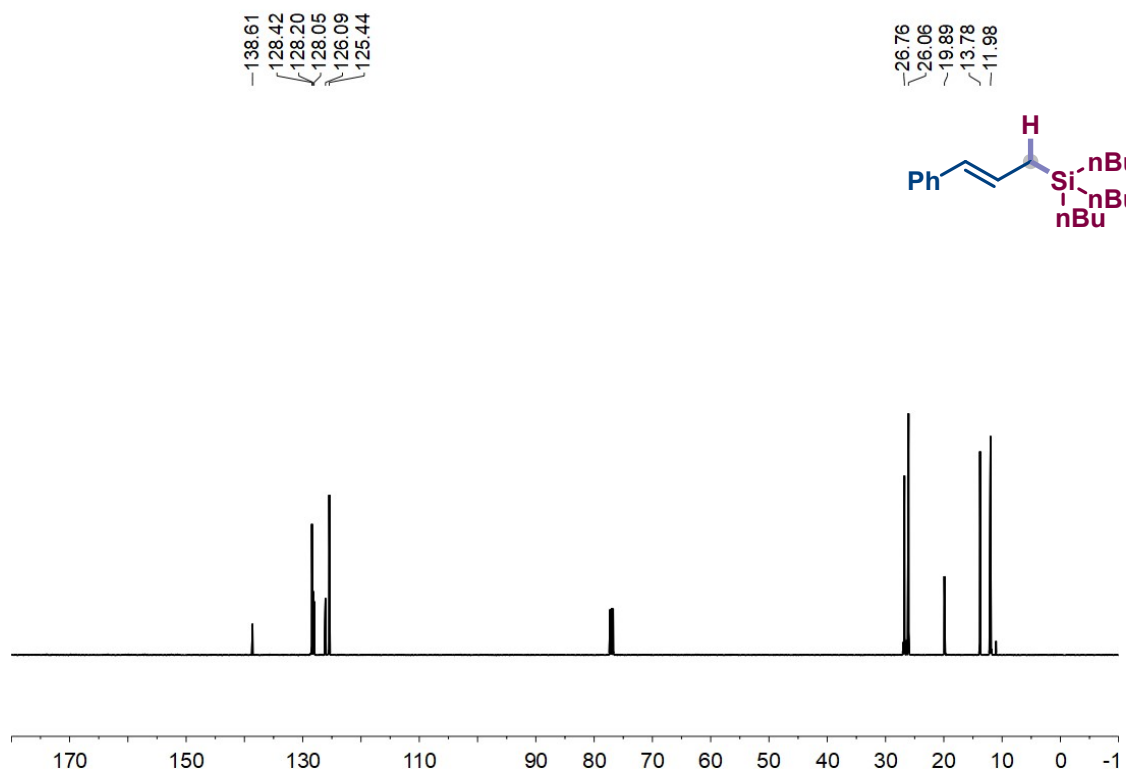

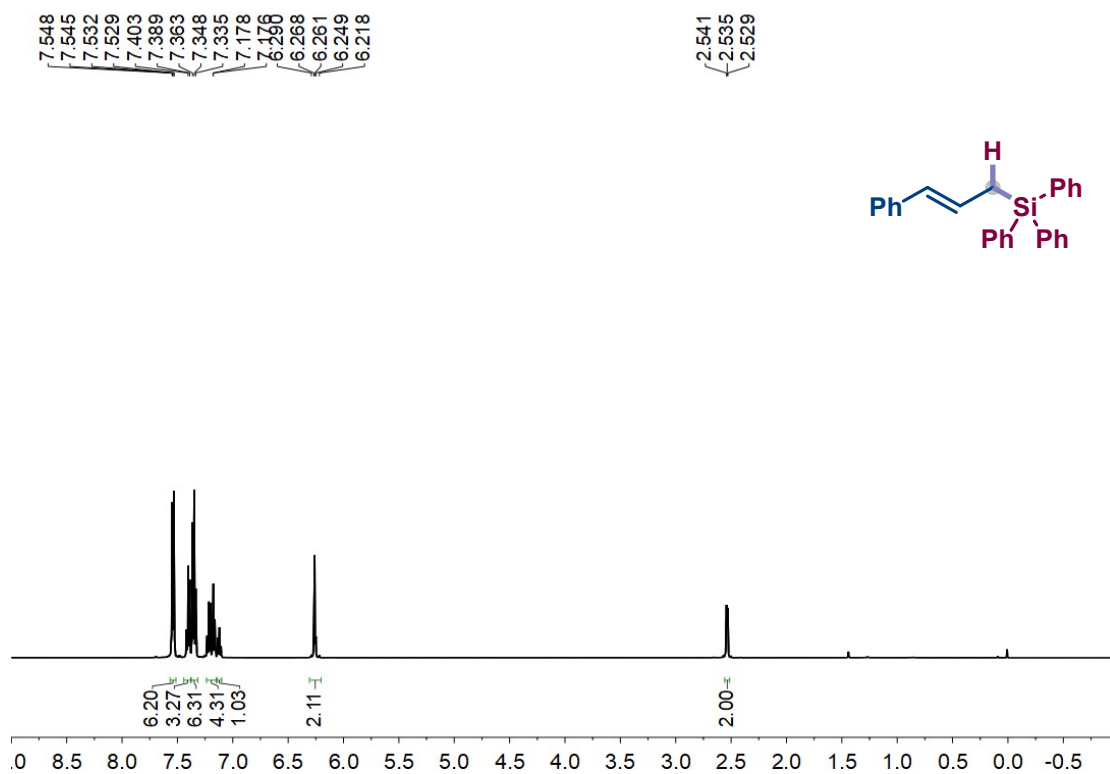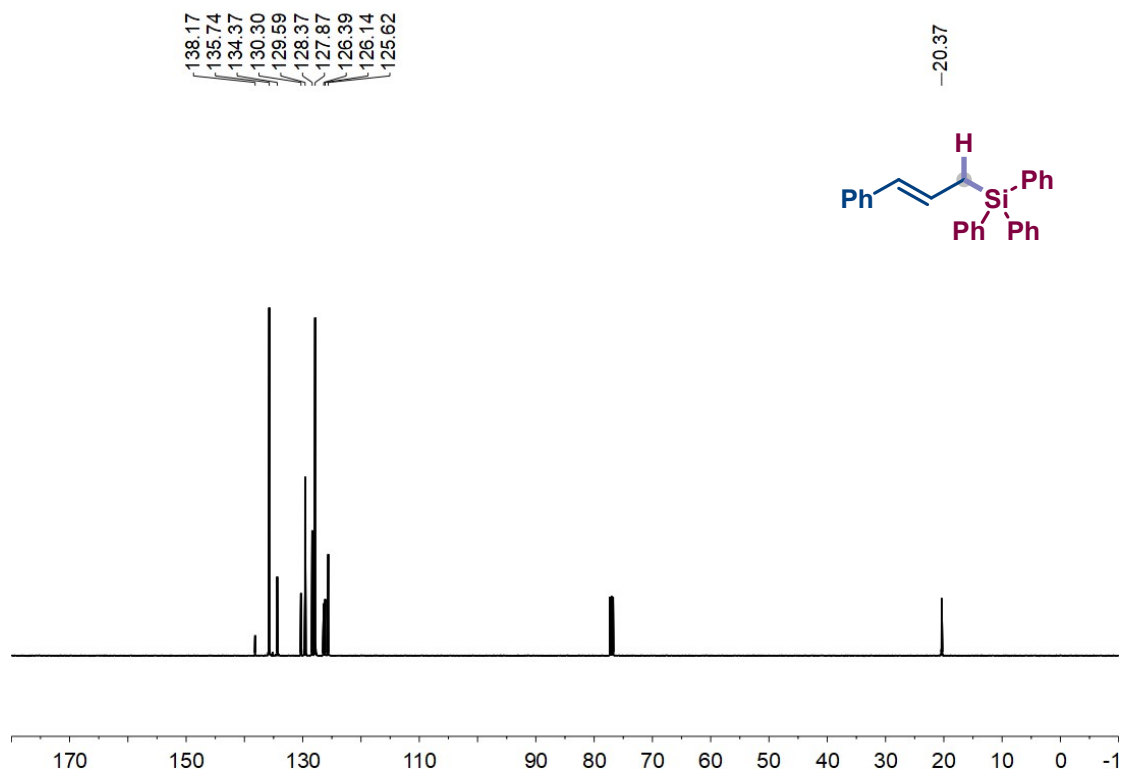

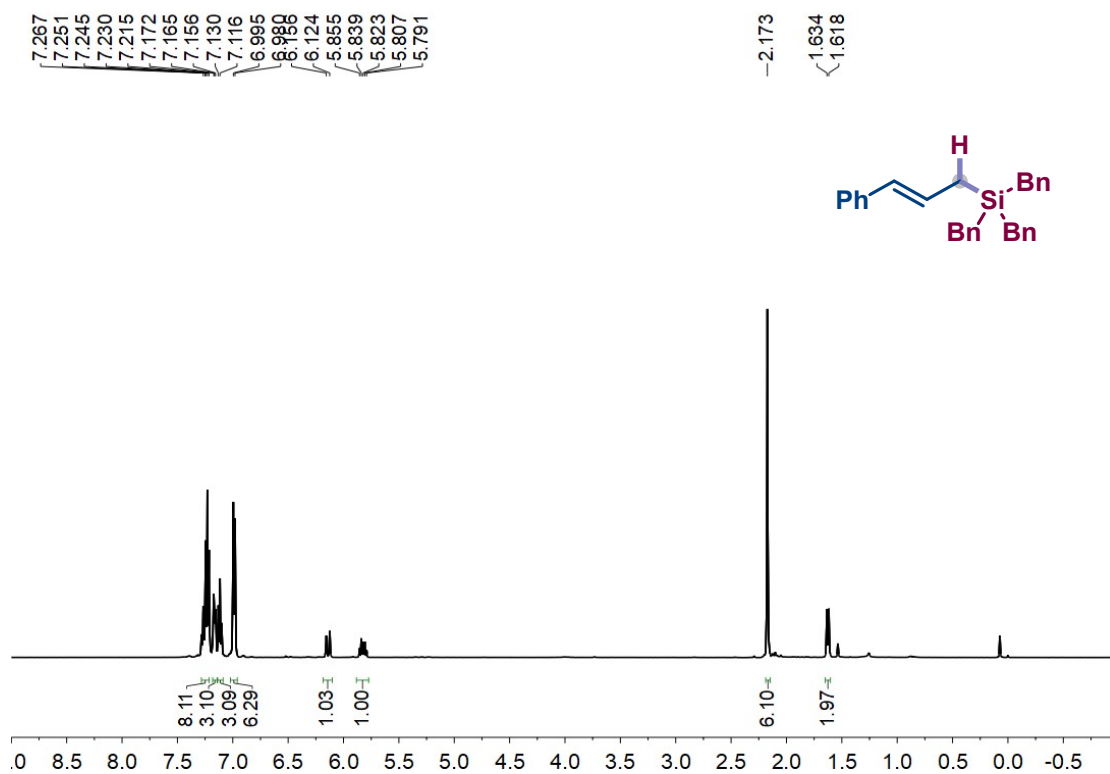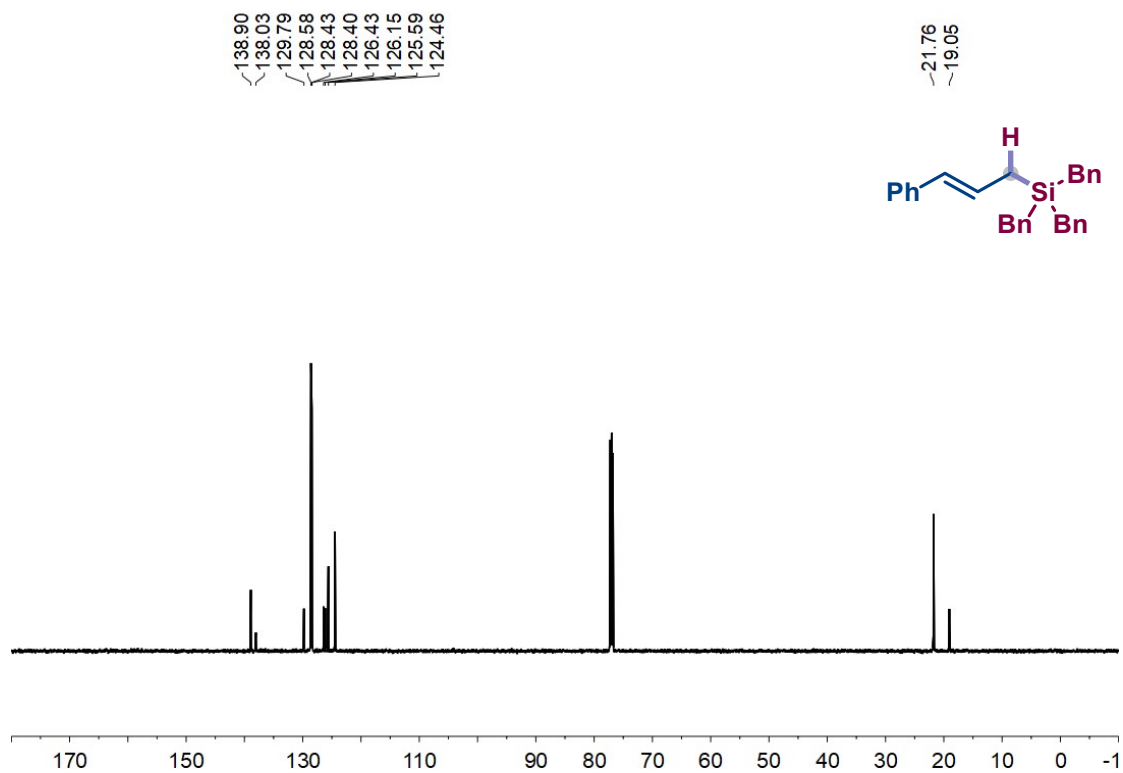

## VII. Computational studies

### 1. Theoretical methodology:

The quantum chemical calculations described in this work were carried out with Gaussian16 package.<sup>[1]</sup> Geometry optimizations were conducted in the framework of the density functional theory (DFT) at the M06<sup>[2]</sup> level. The effective core potential SDD<sup>[3]</sup> basis set was used to represent Ag and Br atoms, all the other atoms (C, H, O, N etc.) were described with 6-31G(d, p) basis set.<sup>[4-6]</sup> The nature of the local minima was established with analytical frequencies calculations and The single-point energies were subsequently obtained at the same functional and basis set with SMD(CHCl<sub>3</sub>) solvent model.<sup>[7]</sup> Intrinsic reaction coordinate (IRC)<sup>[8,9]</sup> calculations were carried out to ascertain the true nature of the transition states. 3D structures of optimized geometries were generated using CYLview visualization software.<sup>[10]</sup>

[1]. Gaussian 16 Revision C.01, M. J. Frisch, G. W. Trucks, H. B. Schlegel, G. E. Scuseria, M. A. Robb, J. R. Cheeseman, G. Scalmani, V. Barone, G. A. Petersson, H. Nakatsuji, X. Li, M. Caricato, A. V. Marenich, J. Bloino, B. G. Janesko, R. Gomperts, B. Mennucci, H. P. Hratchian, J. V. Ortiz, A. F. Izmaylov, J. L. Sonnenberg, D. Williams-Young, F. Ding, F. Lipparini, F. Egidi, J. Goings, B. Peng, A. Petrone, T. Henderson, D. Ranasinghe, V. G. Zakrzewski, J. Gao, N. Rega, G. Zheng, W. Liang, M. Hada, M. Ehara, K. Toyota, R. Fukuda, J. Hasegawa, M. Ishida, T. Nakajima, Y. Honda, O. Kitao, H. Nakai, T. Vreven, K. Throssell, J. A. Montgomery, Jr., J. E. Peralta, F. Ogliaro, M. J. Bearpark, J. J. Heyd, E. N. Brothers, K. N. Kudin, V. N. Staroverov, T. A. Keith, R. Kobayashi, J. Normand, K. Raghavachari, A. P. Rendell, J. C. Burant, S. S. Iyengar, J. Tomasi, M. Cossi, J. M. Millam, M. Klene, C. Adamo, R. Cammi, J. W. Ochterski, R. L. Martin, K. Morokuma, O. Farkas, J. B. Foresman, D. J. Fox, Gaussian, Inc. Wallingford CT, **2019**.

[2]. Y. Zhao, D. G. Truhlar, Zhao, Y. and Truhlar, D. G. (2008). The M06 suite of density functionals for main group thermochemistry, thermochemical kinetics, noncovalent interactions, excited states, and transition elements: two new functionals and systematic testing of four M06-class functionals and 12 other functionals. *Theor. Chem. Acc.* 120,215–241.

[3]. M. Dolg, U. Wedig, H. Stoll, H. Preuss, *J. Chem. Phys.* **1987**, 86, 866.

[4]. J. Andzelm, S. Huzinaga, *Gaussian Basis Sets for Molecular Calculations*, Elsevier Science, New York, **1984**.

[5]. W. J. Hehre, R. Ditchfield, J. A. Pople, *J. Chem. Phys.* **1972**, 56, 2257.



- [6]. J. D. Dill, J. A. Pople, *J. Chem. Phys.* **1975**, *62*, 2921.
- [7]. A. V. Marenich, C. J. Cramer, D. G. Truhlar, *J. Phys. Chem. B*, **2009**, *113*, 6378.
- [8]. K. Fukui, *J. Phys. Chem.* **1970**, *74*, 4161.
- [9]. K. Fukui, *Acc. Chem. Res.* **1981**, *14*, 363.
- [10]. C. Y. Legault, CYLview, 1.0b; Université de Sherbrooke: Canada, 2009. Available at: <http://www.cylview.org> (accessed September, **2014**).

## 2、 Cartesian coordinates of the computed structures

1a

|                                              |                             |
|----------------------------------------------|-----------------------------|
| Zero-point correction=                       | 0.338308 (Hartree/Particle) |
| Thermal correction to Energy=                | 0.383646                    |
| Thermal correction to Enthalpy=              | 0.384590                    |
| Thermal correction to Gibbs Free Energy=     | 0.245608                    |
| Sum of electronic and zero-point Energies=   | -1538.067034                |
| Sum of electronic and thermal Energies=      | -1538.021695                |
| Sum of electronic and thermal Enthalpies=    | -1538.020751                |
| Sum of electronic and thermal Free Energies= | -1538.159734                |

|   |            |            |             |
|---|------------|------------|-------------|
| N | 1.39944100 | 3.29730600 | -2.49219300 |
| N | 0.81499300 | 4.26830600 | -2.51914500 |
| C | 2.04115600 | 2.13018400 | -2.41612700 |
| H | 1.95841800 | 1.55863100 | -3.34368900 |
| C | 3.26424400 | 2.06322200 | -1.60587300 |
| H | 3.37956700 | 2.83035400 | -0.84209800 |
| C | 4.17287200 | 1.08706100 | -1.78781800 |
| H | 3.98094900 | 0.40282100 | -2.61909700 |
| C | 5.38447700 | 0.82242400 | -1.01301300 |
| C | 6.48209200 | 0.23944900 | -1.69276600 |
| C | 5.48164100 | 1.04728500 | 0.37972000  |

|    |             |             |             |
|----|-------------|-------------|-------------|
| C  | 7.64544100  | -0.06504400 | -0.99463400 |
| C  | 6.66717500  | 0.71563100  | 1.03770100  |
| C  | 7.76383600  | 0.17132400  | 0.37533700  |
| H  | 8.48574900  | -0.50418100 | -1.53464100 |
| H  | 6.72833800  | 0.88079000  | 2.11447800  |
| Ag | 0.74417500  | 0.84254900  | -0.98575100 |
| N  | 0.65598900  | -1.26718800 | 0.11153400  |
| N  | -0.41335500 | -1.50963000 | 0.92011700  |
| N  | -0.42906400 | 1.49283100  | 1.02337200  |
| N  | -1.52315600 | 0.75292200  | 1.34676400  |
| N  | -1.57192400 | 0.21428800  | -1.55376400 |
| N  | -2.18460200 | -0.61772300 | -0.67010400 |
| B  | -1.72425300 | -0.68866800 | 0.81194800  |
| C  | 1.57096300  | -2.17083900 | 0.41573400  |
| C  | 1.13236800  | -3.03095900 | 1.42659100  |
| C  | -0.13811800 | -2.56765100 | 1.71318800  |
| C  | -0.62526200 | 2.69341600  | 1.53650700  |
| C  | -1.84599100 | 2.77940600  | 2.21166200  |
| C  | -2.38381900 | 1.51485900  | 2.05438300  |
| C  | -2.18743000 | 0.04908400  | -2.70941600 |
| C  | -3.21773600 | -0.89207100 | -2.62252900 |
| C  | -3.17184800 | -1.28955100 | -1.29824300 |
| H  | -2.56572700 | -1.22582100 | 1.45557500  |
| Br | -4.40072800 | -1.47585300 | -3.97753700 |
| Br | -2.58523000 | 4.25929000  | 3.12685700  |
| Br | 2.04936400  | -4.48743000 | 2.20908400  |
| Br | -1.33405800 | -3.26682900 | 3.00473000  |
| Br | 3.24600300  | -2.20366600 | -0.47278000 |
| Br | -4.06177300 | 0.90051200  | 2.68197000  |
| Br | 0.66435900  | 4.06644400  | 1.29517400  |
| Br | -4.27380800 | -2.57407900 | -0.44776600 |

|    |             |             |             |
|----|-------------|-------------|-------------|
| Br | -1.65066400 | 1.04364300  | -4.23742600 |
| C  | 4.35360900  | 1.58589300  | 1.21135500  |
| H  | 4.28636200  | 2.68148100  | 1.16394100  |
| H  | 3.37586000  | 1.19200600  | 0.90114100  |
| H  | 4.50188100  | 1.32509100  | 2.26480200  |
| C  | 9.03486300  | -0.14092900 | 1.10321400  |
| H  | 8.86034600  | -0.28608200 | 2.17498200  |
| H  | 9.51260300  | -1.04507100 | 0.70858500  |
| H  | 9.76170900  | 0.67597300  | 0.99981800  |
| C  | 6.41904000  | -0.04898600 | -3.16471500 |
| H  | 5.65625600  | -0.80367500 | -3.40463800 |
| H  | 6.17337800  | 0.84566100  | -3.75062400 |
| H  | 7.37842500  | -0.43260700 | -3.52623500 |

TS1

|                                              |                             |
|----------------------------------------------|-----------------------------|
| Zero-point correction=                       | 0.335951 (Hartree/Particle) |
| Thermal correction to Energy=                | 0.380576                    |
| Thermal correction to Enthalpy=              | 0.381521                    |
| Thermal correction to Gibbs Free Energy=     | 0.244737                    |
| Sum of electronic and zero-point Energies=   | -1538.045406                |
| Sum of electronic and thermal Energies=      | -1538.000781                |
| Sum of electronic and thermal Enthalpies=    | -1537.999837                |
| Sum of electronic and thermal Free Energies= | -1538.136621                |

|   |            |            |             |
|---|------------|------------|-------------|
| N | 2.09261200 | 0.72544700 | -3.83014400 |
| N | 1.66814400 | 1.58129900 | -4.40046800 |

|    |             |             |             |
|----|-------------|-------------|-------------|
| C  | 2.51827900  | -0.18567000 | -2.36123300 |
| H  | 2.67711300  | -1.15120100 | -2.85534100 |
| C  | 3.72007700  | 0.42169000  | -1.84700300 |
| H  | 3.62838500  | 1.41342500  | -1.40882900 |
| C  | 4.82993800  | -0.34862000 | -1.68908100 |
| H  | 4.76585100  | -1.33170100 | -2.16007400 |
| C  | 6.03217600  | -0.12898600 | -0.90405700 |
| C  | 6.77603700  | -1.27843300 | -0.52054300 |
| C  | 6.50077500  | 1.15239000  | -0.51592700 |
| C  | 7.92266300  | -1.12856600 | 0.25004300  |
| C  | 7.66373500  | 1.24750000  | 0.24377900  |
| C  | 8.38308700  | 0.12565400  | 0.65084800  |
| H  | 8.47936700  | -2.01812600 | 0.54671500  |
| H  | 8.02357000  | 2.23770100  | 0.52577600  |
| Ag | 0.71481600  | 0.04732200  | -1.20276900 |
| N  | 0.22130400  | -0.61526400 | 1.09539000  |
| N  | -0.99952800 | -0.33082400 | 1.62227500  |
| N  | -0.87680500 | 1.69226600  | -0.54651500 |
| N  | -2.04931900 | 1.33287600  | 0.03875700  |
| N  | -1.50412900 | -1.06876100 | -1.54230900 |
| N  | -2.24052600 | -1.17042100 | -0.40569500 |
| B  | -2.21293400 | -0.06760700 | 0.68600900  |
| C  | 1.05774200  | -0.69910100 | 2.11395600  |
| C  | 0.41201300  | -0.47838000 | 3.33532400  |
| C  | -0.89966100 | -0.24316800 | 2.96402300  |
| C  | -1.02654000 | 2.93210100  | -0.96890700 |
| C  | -2.29757900 | 3.43098400  | -0.66834200 |
| C  | -2.91058800 | 2.37115400  | -0.02389500 |
| C  | -1.66242100 | -2.20647900 | -2.19275200 |
| C  | -2.49997700 | -3.08969900 | -1.50445900 |
| C  | -2.83540100 | -2.38051400 | -0.36425500 |

|    |             |             |             |
|----|-------------|-------------|-------------|
| H  | -3.22174900 | -0.09912100 | 1.31762400  |
| Br | -3.05707600 | -4.82680100 | -2.00472100 |
| Br | -3.00834000 | 5.14345700  | -1.03997300 |
| Br | 1.14657300  | -0.50160700 | 5.07819400  |
| Br | -2.36127600 | 0.16514500  | 4.09795300  |
| Br | 2.90148000  | -1.05166800 | 1.82323500  |
| Br | -4.66697500 | 2.33254300  | 0.68238300  |
| Br | 0.39639600  | 3.81307600  | -1.86839500 |
| Br | -3.91243800 | -2.96255500 | 1.08171300  |
| Br | -0.79058200 | -2.48992800 | -3.85914000 |
| C  | 5.82339900  | 2.42863100  | -0.91274900 |
| H  | 5.52783100  | 2.43270700  | -1.96841000 |
| H  | 4.91760800  | 2.61141700  | -0.31843300 |
| H  | 6.49082400  | 3.28028000  | -0.74687900 |
| C  | 9.60504700  | 0.25882300  | 1.50333300  |
| H  | 10.10279600 | 1.22212300  | 1.34820200  |
| H  | 9.34594000  | 0.19583700  | 2.56870600  |
| H  | 10.32598200 | -0.54089900 | 1.30070000  |
| C  | 6.35510100  | -2.66701000 | -0.90892400 |
| H  | 5.34934400  | -2.91612000 | -0.54784700 |
| H  | 6.34784300  | -2.80695400 | -1.99769600 |
| H  | 7.04627700  | -3.40573000 | -0.49197500 |

Int1

|                                 |                             |
|---------------------------------|-----------------------------|
| Zero-point correction=          | 0.329178 (Hartree/Particle) |
| Thermal correction to Energy=   | 0.372442                    |
| Thermal correction to Enthalpy= | 0.373386                    |

|                                              |              |
|----------------------------------------------|--------------|
| Thermal correction to Gibbs Free Energy=     | 0.236970     |
| Sum of electronic and zero-point Energies=   | -1428.622582 |
| Sum of electronic and thermal Energies=      | -1428.579319 |
| Sum of electronic and thermal Enthalpies=    | -1428.578375 |
| Sum of electronic and thermal Free Energies= | -1428.714790 |

|    |             |             |             |
|----|-------------|-------------|-------------|
| C  | 3.00062500  | -0.22889900 | 1.16989900  |
| H  | 3.17236300  | -0.69073900 | 2.15446600  |
| C  | 4.19205500  | 0.07526500  | 0.52140800  |
| H  | 4.14983900  | 0.53073100  | -0.46235100 |
| C  | 5.40991600  | -0.20099200 | 1.14574600  |
| H  | 5.27424600  | -0.65769000 | 2.12740600  |
| C  | 6.76823800  | -0.00863500 | 0.77317200  |
| C  | 7.75973500  | -0.43147400 | 1.72189300  |
| C  | 7.19885000  | 0.56399100  | -0.46764700 |
| C  | 9.10165000  | -0.27719800 | 1.41985700  |
| C  | 8.55745200  | 0.69001900  | -0.71105500 |
| C  | 9.52403100  | 0.28297100  | 0.21164400  |
| H  | 9.85002300  | -0.60249000 | 2.14165400  |
| H  | 8.88350200  | 1.12112900  | -1.65701700 |
| Ag | 1.06398500  | 0.08778000  | 0.44949700  |
| N  | -0.52808200 | 1.74569400  | -0.08793400 |
| N  | -1.72360700 | 1.44650000  | -0.66398000 |
| N  | -0.10816800 | -0.81750900 | -1.57510300 |
| N  | -1.45267900 | -0.96445600 | -1.44418300 |
| N  | -1.10138400 | -0.93234800 | 1.40794800  |
| N  | -2.26878500 | -0.48252000 | 0.87675100  |
| B  | -2.30581100 | 0.01099100  | -0.59476000 |
| C  | -0.33479000 | 3.03940000  | -0.26757000 |
| C  | -1.39748500 | 3.62946700  | -0.95858300 |

|    |             |             |             |
|----|-------------|-------------|-------------|
| C  | -2.25785700 | 2.57126200  | -1.18594400 |
| C  | 0.31383400  | -1.87369200 | -2.24747500 |
| C  | -0.73223900 | -2.74556000 | -2.56530600 |
| C  | -1.83891500 | -2.12058600 | -2.02015800 |
| C  | -1.35929100 | -1.22087600 | 2.66946700  |
| C  | -2.69524200 | -0.97005300 | 3.00310200  |
| C  | -3.23133300 | -0.49494800 | 1.82041800  |
| H  | -3.42552200 | 0.02489000  | -1.00136200 |
| Br | -3.57162000 | -1.22912400 | 4.66054700  |
| Br | -0.66452000 | -4.37827500 | -3.51878100 |
| Br | -1.61599300 | 5.44149700  | -1.45497800 |
| Br | -3.93160000 | 2.64155800  | -2.07036000 |
| Br | 1.23765500  | 3.88636700  | 0.37531500  |
| Br | -3.62851700 | -2.74533000 | -2.00568400 |
| Br | 2.15486900  | -2.07533000 | -2.67615200 |
| Br | -5.01052100 | 0.07763500  | 1.50662200  |
| Br | 0.00478800  | -1.89753100 | 3.80803400  |
| C  | 6.26249400  | 1.03770800  | -1.53265800 |
| H  | 5.61669800  | 0.23130200  | -1.90126000 |
| H  | 5.60967300  | 1.84366700  | -1.17568800 |
| H  | 6.82693600  | 1.42431400  | -2.38607500 |
| C  | 10.97569400 | 0.46614000  | -0.07648000 |
| H  | 11.17878300 | 0.44953700  | -1.15219000 |
| H  | 11.31699500 | 1.43871700  | 0.30338600  |
| H  | 11.58378100 | -0.30191000 | 0.41273600  |
| C  | 7.40156600  | -1.04602000 | 3.04244200  |
| H  | 6.80461200  | -0.36953100 | 3.66588200  |
| H  | 6.82800000  | -1.97325300 | 2.92398000  |
| H  | 8.30791800  | -1.29191100 | 3.60263500  |

Int2

|                                              |                             |
|----------------------------------------------|-----------------------------|
| Zero-point correction=                       | 0.535697 (Hartree/Particle) |
| Thermal correction to Energy=                | 0.591441                    |
| Thermal correction to Enthalpy=              | 0.592385                    |
| Thermal correction to Gibbs Free Energy=     | 0.431776                    |
| Sum of electronic and zero-point Energies=   | -1956.001969                |
| Sum of electronic and thermal Energies=      | -1955.946225                |
| Sum of electronic and thermal Enthalpies=    | -1955.945281                |
| Sum of electronic and thermal Free Energies= | -1956.105891                |

|    |             |             |             |
|----|-------------|-------------|-------------|
| C  | 2.30893700  | -2.32359400 | -0.88329200 |
| H  | 2.53658400  | -2.89864700 | -1.79425000 |
| C  | 3.46353400  | -2.00444700 | -0.17539300 |
| H  | 3.37598200  | -1.43186200 | 0.74445700  |
| C  | 4.71196200  | -2.36412800 | -0.68098200 |
| H  | 4.64621600  | -2.87055200 | -1.64572000 |
| C  | 6.03827500  | -2.15880200 | -0.20586600 |
| C  | 7.10317900  | -2.41003200 | -1.13396300 |
| C  | 6.36217100  | -1.73200500 | 1.12041400  |
| C  | 8.41185600  | -2.19209800 | -0.74162800 |
| C  | 7.69493600  | -1.54619500 | 1.45820100  |
| C  | 8.73184200  | -1.75739100 | 0.54826500  |
| H  | 9.21677600  | -2.36530200 | -1.45554600 |
| H  | 7.93913400  | -1.22885700 | 2.47147800  |
| Ag | 0.36421300  | -1.65116300 | -0.51010600 |
| N  | -1.95505100 | -2.01167000 | -0.24440700 |
| N  | -2.85569100 | -0.99499700 | -0.14919500 |
| N  | -0.36410500 | -0.09966400 | 1.41354500  |
| N  | -1.53427500 | 0.58547000  | 1.32957300  |



|    |             |             |             |
|----|-------------|-------------|-------------|
| N  | -0.70290800 | 0.19232400  | -1.80407300 |
| N  | -1.61717300 | 0.98033100  | -1.18177000 |
| B  | -2.41411900 | 0.47862300  | 0.05461900  |
| C  | -2.65165600 | -3.12708000 | -0.35249700 |
| C  | -4.02792600 | -2.88177300 | -0.32914800 |
| C  | -4.10533700 | -1.50831600 | -0.19615400 |
| C  | 0.14104300  | 0.17493400  | 2.59910800  |
| C  | -0.67076400 | 1.05288600  | 3.32626800  |
| C  | -1.73162300 | 1.28283800  | 2.47015000  |
| C  | -0.18554300 | 0.91472800  | -2.77968700 |
| C  | -0.73716200 | 2.20012400  | -2.82251000 |
| C  | -1.64545000 | 2.19051900  | -1.77928000 |
| H  | -3.37884800 | 1.15887900  | 0.19586500  |
| Br | -0.35013300 | 3.61921200  | -4.01363600 |
| Br | -0.39109200 | 1.76073200  | 5.05842200  |
| Br | -5.44563000 | -4.12845300 | -0.44585300 |
| Br | -5.68959000 | -0.47428500 | -0.08211200 |
| Br | -1.77775900 | -4.80370300 | -0.51261300 |
| Br | -3.23848400 | 2.38334100  | 2.80133000  |
| Br | 1.77886400  | -0.60911500 | 3.16318000  |
| Br | -2.74844300 | 3.62405000  | -1.21497600 |
| Br | 1.13184900  | 0.18255600  | -3.93675000 |
| C  | 5.34176600  | -1.51170500 | 2.19194600  |
| H  | 4.75987000  | -0.59657900 | 2.01346100  |
| H  | 4.63630100  | -2.34806000 | 2.26442100  |
| H  | 5.83399600  | -1.39910700 | 3.16272100  |
| C  | 10.15625000 | -1.55675800 | 0.94366100  |
| H  | 10.24441100 | -0.99620600 | 1.87922600  |
| H  | 10.65368500 | -2.52543200 | 1.08550800  |
| H  | 10.71319400 | -1.02780000 | 0.16183500  |
| C  | 6.85171800  | -2.87547400 | -2.53741700 |

|    |            |             |             |
|----|------------|-------------|-------------|
| H  | 6.33152300 | -3.84116100 | -2.56421100 |
| H  | 6.24391500 | -2.16219200 | -3.10691000 |
| H  | 7.79886900 | -3.00031100 | -3.06947100 |
| Si | 2.49336100 | 2.18153300  | -0.36625700 |
| H  | 2.08662700 | 0.81338900  | -0.81728100 |
| C  | 3.08548900 | 3.14600200  | -1.88450500 |
| C  | 3.12066900 | 4.66274400  | -1.71583100 |
| H  | 2.41449900 | 2.88549600  | -2.71790600 |
| H  | 4.07708000 | 2.76727000  | -2.17714000 |
| H  | 3.43070300 | 5.17020600  | -2.63869400 |
| H  | 2.13214400 | 5.06089700  | -1.44999100 |
| H  | 3.81560100 | 4.97531100  | -0.92557100 |
| C  | 3.91208700 | 1.94059400  | 0.86724800  |
| C  | 4.76501300 | 3.16994600  | 1.16718700  |
| H  | 4.54905700 | 1.14207700  | 0.45084900  |
| H  | 3.49180800 | 1.53052800  | 1.79911600  |
| H  | 5.56560000 | 2.94853900  | 1.88490500  |
| H  | 5.24593400 | 3.55546600  | 0.25867800  |
| H  | 4.16964100 | 3.98861400  | 1.59180800  |
| C  | 0.97217600 | 3.02460000  | 0.39320500  |
| C  | 1.20571900 | 3.88866900  | 1.62847600  |
| H  | 0.24920900 | 2.23169500  | 0.63070400  |
| H  | 0.49814900 | 3.62356200  | -0.40104400 |
| H  | 0.26321200 | 4.29549100  | 2.02169900  |
| H  | 1.67170200 | 3.31457100  | 2.44191700  |
| H  | 1.86308400 | 4.74312600  | 1.41826700  |

TS2

|                                              |                             |
|----------------------------------------------|-----------------------------|
| Zero-point correction=                       | 0.533544 (Hartree/Particle) |
| Thermal correction to Energy=                | 0.588709                    |
| Thermal correction to Enthalpy=              | 0.589653                    |
| Thermal correction to Gibbs Free Energy=     | 0.430353                    |
| Sum of electronic and zero-point Energies=   | -1955.995235                |
| Sum of electronic and thermal Energies=      | -1955.940070                |
| Sum of electronic and thermal Enthalpies=    | -1955.939126                |
| Sum of electronic and thermal Free Energies= | -1956.098426                |

|    |             |             |             |
|----|-------------|-------------|-------------|
| C  | -2.57137300 | 0.61331600  | -0.83147300 |
| H  | -2.91773100 | 0.17863900  | -1.78085300 |
| C  | -3.63951500 | 1.14324500  | -0.05615800 |
| H  | -3.40127000 | 1.59510300  | 0.90320300  |
| C  | -4.90493500 | 1.20822400  | -0.58182900 |
| H  | -4.99853800 | 0.73585800  | -1.56282900 |
| C  | -6.10787500 | 1.84727500  | -0.10184400 |
| C  | -7.12601200 | 2.11900700  | -1.06144500 |
| C  | -6.34109200 | 2.17827500  | 1.26124300  |
| C  | -8.30384400 | 2.73073500  | -0.65650600 |
| C  | -7.54785700 | 2.77463400  | 1.61351100  |
| C  | -8.53539100 | 3.07347100  | 0.67665000  |
| H  | -9.07059100 | 2.94733600  | -1.40076900 |
| H  | -7.72676700 | 3.01056600  | 2.66278100  |
| Ag | -0.50805200 | 0.98048800  | -0.55142900 |
| N  | 1.57802000  | 1.87651900  | -0.51977400 |
| N  | 2.70975300  | 1.11937000  | -0.54550500 |
| N  | 0.63241800  | -0.42541100 | 1.36342700  |
| N  | 1.98786300  | -0.45470300 | 1.28806000  |
| N  | 1.12205800  | -0.62463000 | -2.08282700 |
| N  | 1.86591100  | -1.20489000 | -1.10752300 |
| B  | 2.68663800  | -0.36564400 | -0.09351400 |

|    |              |             |             |
|----|--------------|-------------|-------------|
| C  | 1.92839900   | 3.09810500  | -0.88422700 |
| C  | 3.29619400   | 3.18080400  | -1.15491400 |
| C  | 3.74736100   | 1.89371100  | -0.92460800 |
| C  | 0.33970300   | -0.41071500 | 2.64992800  |
| C  | 1.48521800   | -0.43390000 | 3.45316900  |
| C  | 2.51396700   | -0.45589600 | 2.52947200  |
| C  | 0.54693800   | -1.61629600 | -2.73757500 |
| C  | 0.88888000   | -2.86810500 | -2.21199000 |
| C  | 1.73321900   | -2.54478300 | -1.16405900 |
| H  | 3.80523200   | -0.77545200 | -0.00835400 |
| Br | 0.37690600   | -4.58896400 | -2.81476700 |
| Br | 1.60625000   | -0.44616000 | 5.34153300  |
| Br | 4.29457000   | 4.69030900  | -1.70076000 |
| Br | 5.52612000   | 1.27167300  | -1.10266700 |
| Br | 0.63886300   | 4.48243200  | -0.99726100 |
| Br | 4.37624100   | -0.47091700 | 2.87705100  |
| Br | -1.47178000  | -0.36179200 | 3.22806900  |
| Br | 2.59302600   | -3.71494700 | 0.05474800  |
| Br | -0.58050100  | -1.25160500 | -4.22710000 |
| C  | -5.37136700  | 1.87788300  | 2.36327800  |
| H  | -4.97876900  | 0.85530800  | 2.30187700  |
| H  | -4.51067700  | 2.55958000  | 2.35299100  |
| H  | -5.85851900  | 1.99195200  | 3.33675500  |
| C  | -9.80355900  | 3.75358900  | 1.08107700  |
| H  | -10.00923900 | 3.62536400  | 2.14891200  |
| H  | -9.74340100  | 4.83273900  | 0.88648300  |
| H  | -10.66086700 | 3.37481200  | 0.51329000  |
| C  | -6.96029000  | 1.78728500  | -2.51602000 |
| H  | -6.08443400  | 2.27872700  | -2.95657000 |
| H  | -6.84456700  | 0.70859600  | -2.68476100 |
| H  | -7.83947700  | 2.10959000  | -3.08179200 |

|    |             |             |             |
|----|-------------|-------------|-------------|
| Si | -2.85116100 | -2.34205200 | -0.01107900 |
| H  | -2.28711500 | -0.90861500 | -0.19065600 |
| C  | -3.38024400 | -2.91178300 | -1.72814300 |
| C  | -3.54811600 | -4.42554700 | -1.85409500 |
| H  | -2.61493500 | -2.56505000 | -2.44094400 |
| H  | -4.30952900 | -2.39106700 | -2.00804600 |
| H  | -3.78790300 | -4.72180500 | -2.88292800 |
| H  | -2.62639000 | -4.95301600 | -1.57427500 |
| H  | -4.34951900 | -4.80799100 | -1.20942500 |
| C  | -4.32009800 | -2.16232100 | 1.15666600  |
| C  | -5.29479400 | -3.33972900 | 1.15355800  |
| H  | -4.85415400 | -1.24437700 | 0.86125800  |
| H  | -3.94589300 | -1.97847300 | 2.17443200  |
| H  | -6.12682200 | -3.17271900 | 1.84868500  |
| H  | -5.73254800 | -3.49673400 | 0.15949000  |
| H  | -4.80916600 | -4.27823900 | 1.44974500  |
| C  | -1.41241600 | -3.35869000 | 0.66212700  |
| C  | -1.80106400 | -4.50205400 | 1.59574400  |
| H  | -0.72176000 | -2.67037100 | 1.17026100  |
| H  | -0.85509800 | -3.74447400 | -0.20533300 |
| H  | -0.91590200 | -5.05274300 | 1.93938300  |
| H  | -2.31996400 | -4.13366400 | 2.49064200  |
| H  | -2.46382600 | -5.22858100 | 1.10733400  |

Pr

|                                            |                             |
|--------------------------------------------|-----------------------------|
| Zero-point correction=                     | 0.429389 (Hartree/Particle) |
| Thermal correction to Energy=              | 0.453256                    |
| Thermal correction to Enthalpy=            | 0.454200                    |
| Thermal correction to Gibbs Free Energy=   | 0.375749                    |
| Sum of electronic and zero-point Energies= | -992.533027                 |

|                                              |             |
|----------------------------------------------|-------------|
| Sum of electronic and thermal Energies=      | -992.509160 |
| Sum of electronic and thermal Enthalpies=    | -992.508216 |
| Sum of electronic and thermal Free Energies= | -992.586667 |

|   |             |             |             |
|---|-------------|-------------|-------------|
| C | -1.43657500 | 1.37533800  | -1.10619300 |
| H | -1.42005000 | 2.35667600  | -0.60755300 |
| C | -0.09617100 | 0.73461000  | -1.06904200 |
| H | 0.05600100  | -0.09586800 | -1.76203000 |
| C | 0.90188400  | 1.07953100  | -0.24138100 |
| H | 0.73487100  | 1.95270100  | 0.39736700  |
| C | 2.22451900  | 0.44766600  | -0.12364000 |
| C | 3.34394900  | 1.28909000  | 0.08228400  |
| C | 2.42393500  | -0.94859900 | -0.16473300 |
| C | 4.61396300  | 0.73850800  | 0.21050800  |
| C | 3.71786200  | -1.45772000 | -0.02361300 |
| C | 4.82710800  | -0.63913300 | 0.15555900  |
| H | 5.46616700  | 1.40410400  | 0.35863300  |
| H | 3.85690200  | -2.53995100 | -0.04585900 |
| C | 1.30241700  | -1.93547000 | -0.32135700 |
| H | 0.39095200  | -1.61174300 | 0.19618000  |
| H | 1.03128900  | -2.09469500 | -1.37366600 |
| H | 1.59615800  | -2.91164000 | 0.08029000  |
| C | 6.20806900  | -1.20742800 | 0.27899200  |
| H | 6.18474200  | -2.28672100 | 0.46472500  |
| H | 6.79035400  | -1.04485300 | -0.63771300 |
| H | 6.76627900  | -0.73460400 | 1.09602100  |
| C | 3.18318700  | 2.77980600  | 0.14788200  |
| H | 2.66725500  | 3.17453700  | -0.73626700 |
| H | 2.59341300  | 3.09221000  | 1.02055900  |

|    |             |             |             |
|----|-------------|-------------|-------------|
| H  | 4.15745900  | 3.27455800  | 0.21870900  |
| Si | -2.75730100 | 0.31278900  | -0.23409100 |
| H  | -1.76990300 | 1.53873600  | -2.14217100 |
| C  | -2.20051200 | 0.08563400  | 1.55980200  |
| C  | -3.28688300 | -0.29994500 | 2.55998600  |
| H  | -1.73967500 | 1.03816400  | 1.86755600  |
| H  | -1.38165000 | -0.64952500 | 1.58533600  |
| H  | -2.88852100 | -0.39815600 | 3.57791000  |
| H  | -4.08382200 | 0.45405000  | 2.59986800  |
| H  | -3.76031900 | -1.25737300 | 2.30709300  |
| C  | -2.89471800 | -1.33279100 | -1.16160500 |
| C  | -3.42304800 | -2.51451200 | -0.35343400 |
| H  | -1.89717400 | -1.57828000 | -1.55718600 |
| H  | -3.52512800 | -1.16510500 | -2.04901300 |
| H  | -3.48842200 | -3.42862900 | -0.95728800 |
| H  | -2.76796600 | -2.73950400 | 0.49870700  |
| H  | -4.42590400 | -2.32354800 | 0.05049700  |
| C  | -4.38413100 | 1.27574300  | -0.32933000 |
| C  | -5.65772100 | 0.46328900  | -0.11233100 |
| H  | -4.41601600 | 1.75116300  | -1.32229700 |
| H  | -4.33314100 | 2.10749100  | 0.39068000  |
| H  | -6.55966300 | 1.08266100  | -0.19902500 |
| H  | -5.75089000 | -0.34215100 | -0.85261800 |
| H  | -5.68419000 | -0.00545100 | 0.87970500  |
